# Supplementary material for: Synthesis, characterization and biological activities of 3-aryl-1,4-naphthoquinones – green palladium-catalysed Suzuki cross coupling
Source: Royal Society of Chemistry journal article supplement (doi:10.1039/c6nj00872k), 2016-01-01
Supplement: c6nj00872k1.pdf [file c6nj00872k1.pdf]

## Supporting Information

### Synthesis, characterization and biological activities of 3-aryl-1,4-naphthoquinones – Green palladium-catalysed Suzuki cross couplings

Aline da Rocha Louvis,<sup>a</sup> Nayane A. A. Silva,<sup>a</sup> Felipe Silva Semaan,<sup>b</sup> Fernando de C. da Silva,<sup>a</sup> Gabriela Saramago,<sup>c</sup> Laís C. S. Velasco de Souza,<sup>c</sup> Bruno L. A. Ferreira,<sup>c</sup> Helena C. Castro,<sup>c</sup> Juliana P. Salles,<sup>e</sup> André Luís A. Sousa,<sup>d</sup> Robson X. Faria,<sup>e</sup> Daniela de L. Martins,<sup>a\*</sup> Vitor F. Ferreira<sup>a\*</sup>

<sup>a</sup> Departamento de Química Orgânica, Universidade Federal Fluminense, Campus do Valonguinho, Centro, Niterói 24020-141, Brazil. dlmartins@id.uff.br

<sup>b</sup> Departamento de Química Analítica, Universidade Federal Fluminense, Campus do Valonguinho, Centro, Niterói 24020-141, Brazil.

<sup>c</sup> LABioMol – Laboratório de Antibióticos, Bioquímica e Modelagem Molecular, Instituto de Biologia, Universidade Federal Fluminense, Niterói 24210-130, Brazil.

<sup>d</sup> Laboratory of Biochemistry of Peptides, Oswaldo Cruz Institute- Fiocruz, Brazil.

<sup>e</sup> Laboratory of Toxoplasmosis and other Protozooses – Oswaldo Cruz Institute- Fiocruz, Brazil.

#### IV, <sup>1</sup>H and <sup>13</sup>C NMR Spectra of the Products

##### 2-Hydroxy-3-iodonaphthalene-1,4-dione (6)

Agilent Resolutions Pro

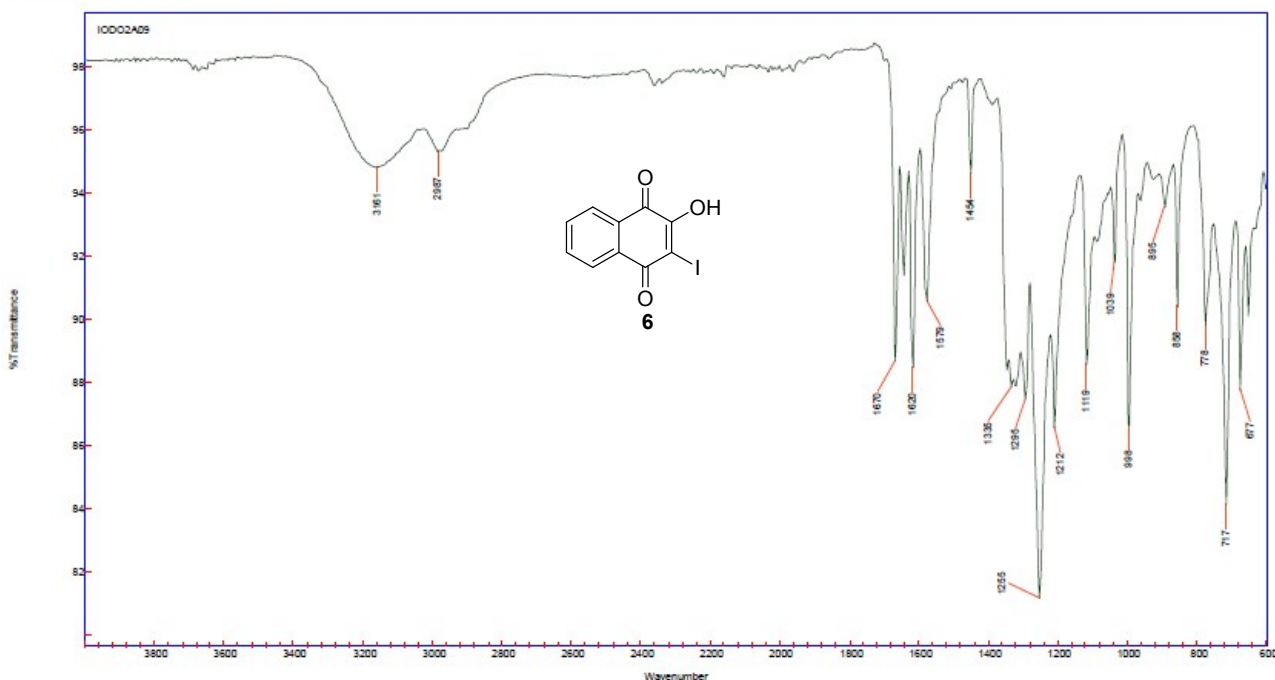

Figure S1 - Infrared spectrum of 2-hydroxy-3-iodonaphthalene-1,4-dione (6)

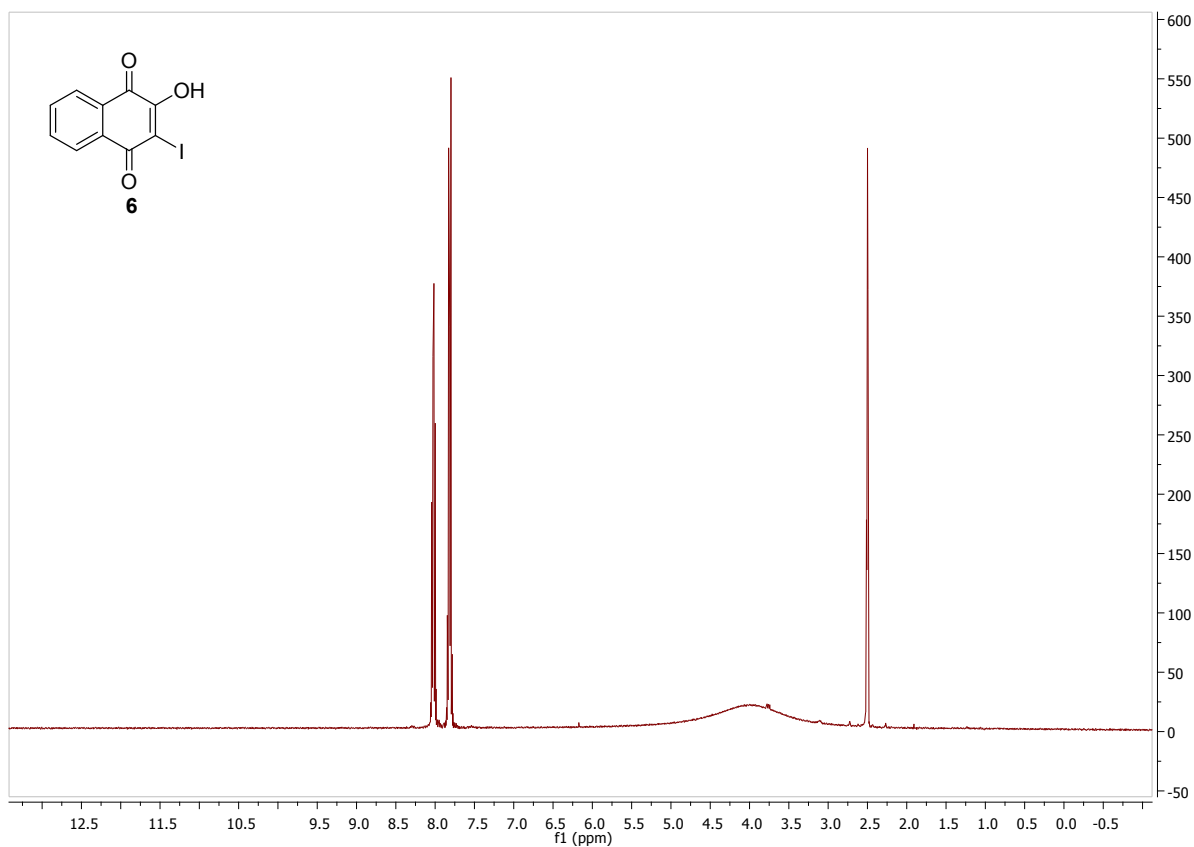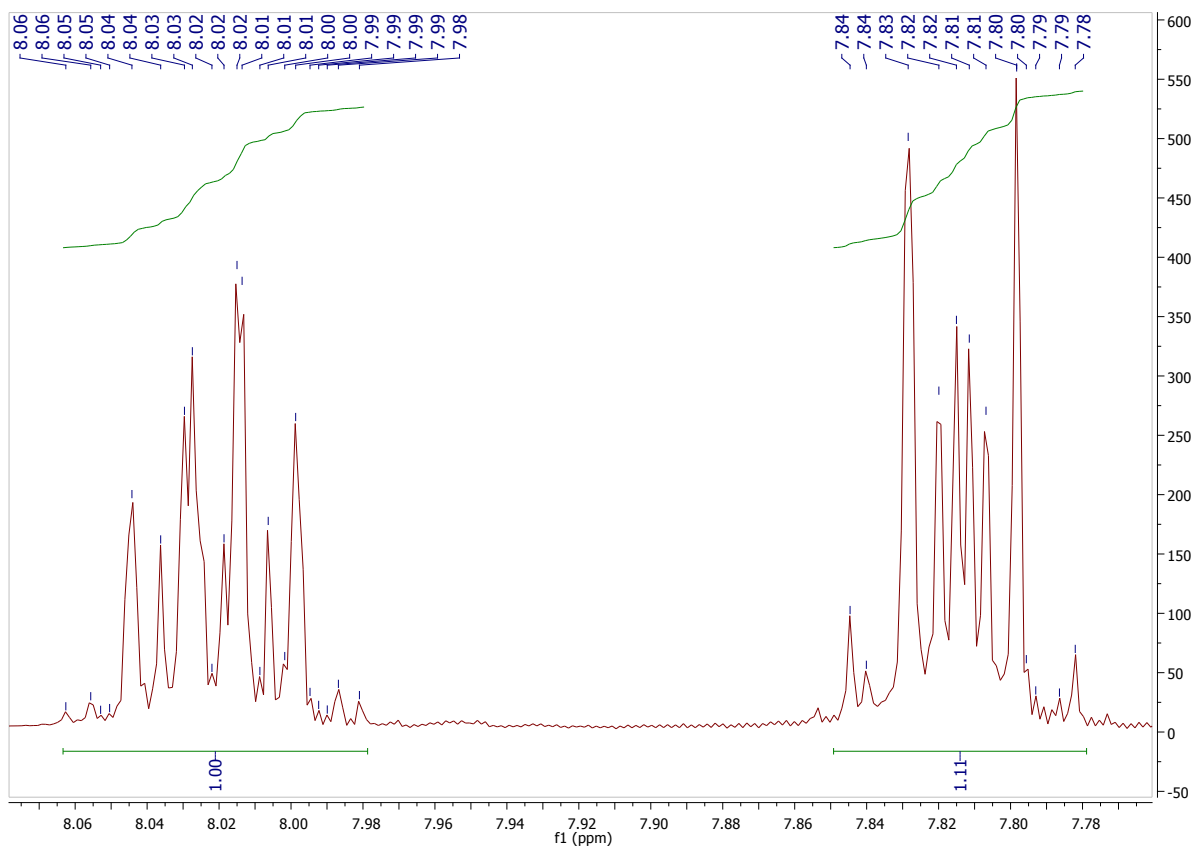

**Figure S2** -  $^1\text{H}$  NMR Spectra of 2-hydroxy-3-iodonaphthalene-1,4-dione (**6**)

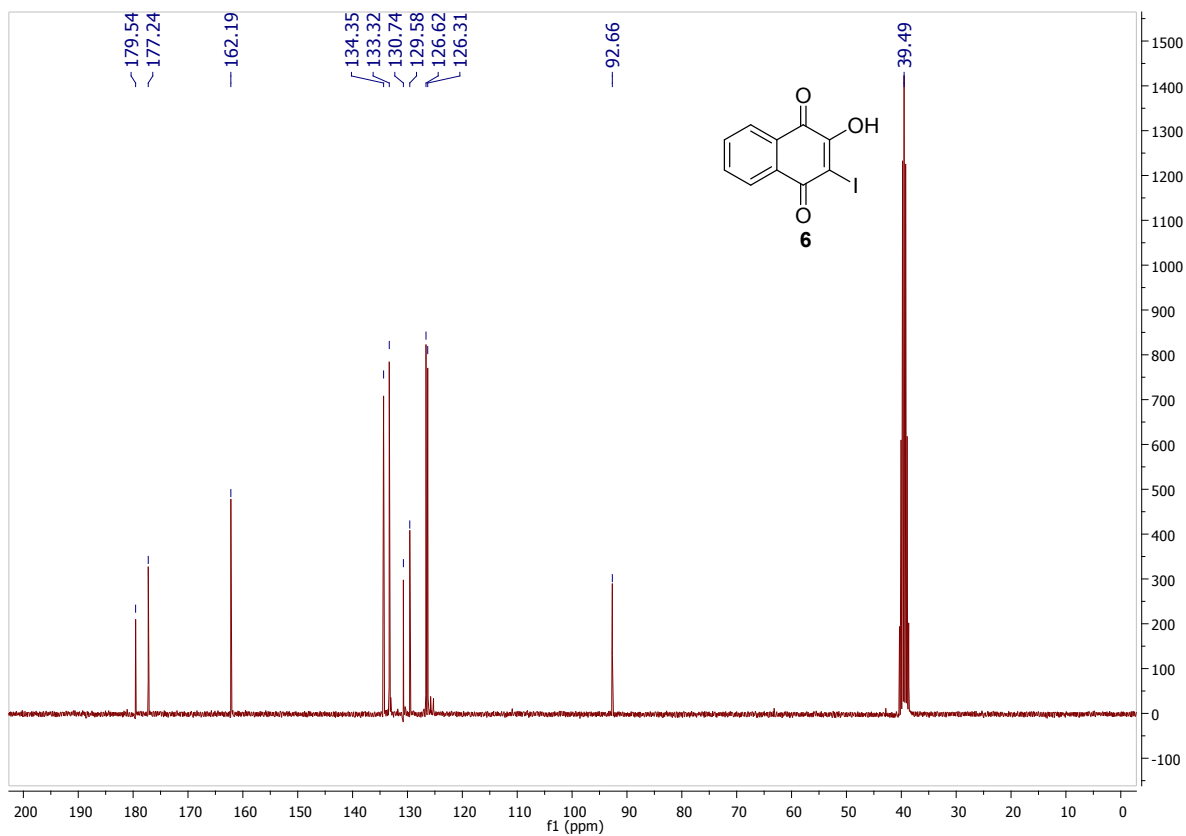

Figure S3 -  $^{13}\text{C}$  NMR Spectra of 2-hydroxy-3-iodonaphthalene-1,4-dione (6)

2-Amino-3-iodonaphthalene-1,4-dione (7)

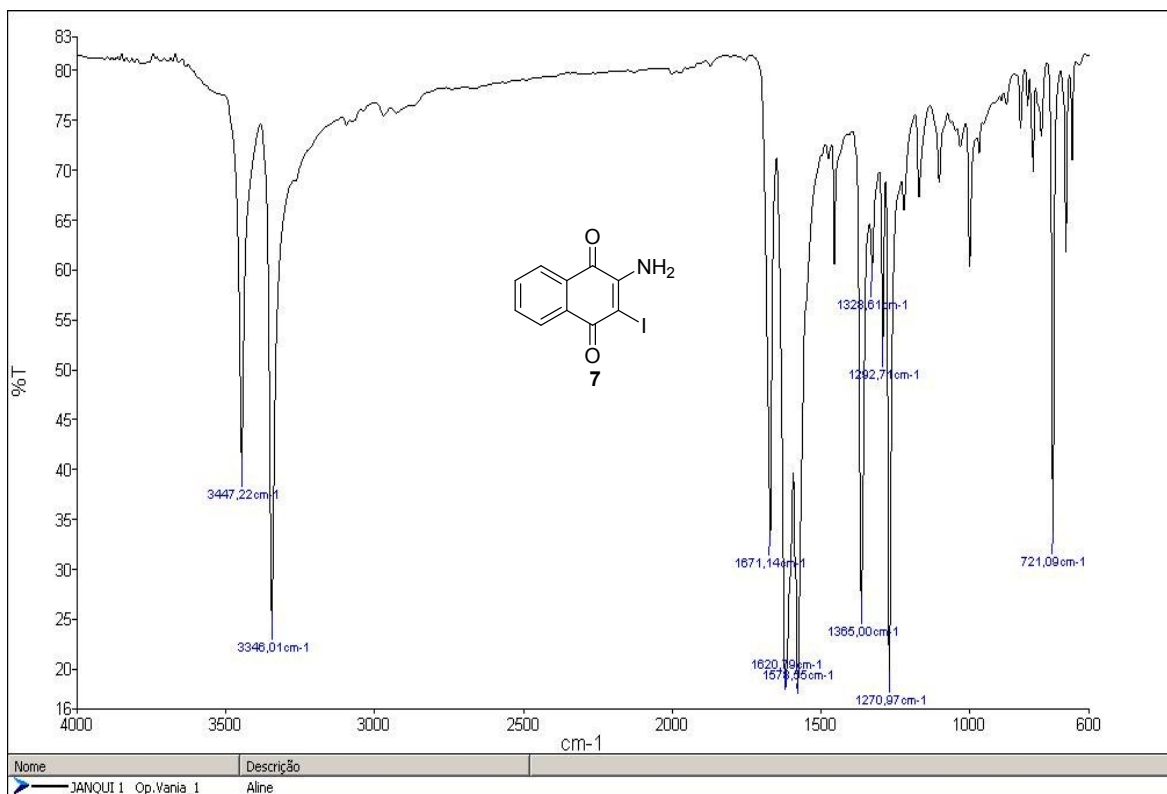

Figure S4 - Infrared spectrum of 2-amino-3-iodonaphthalene-1,4-dione (7)

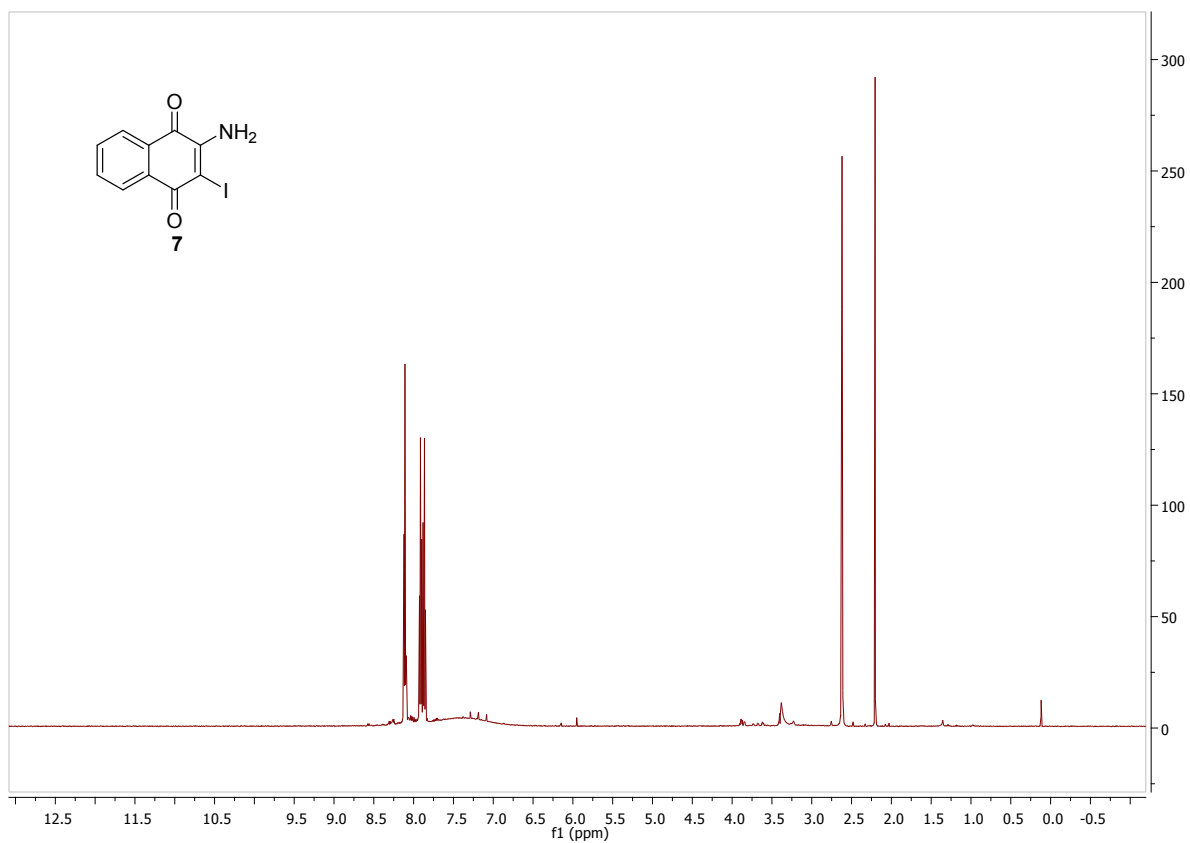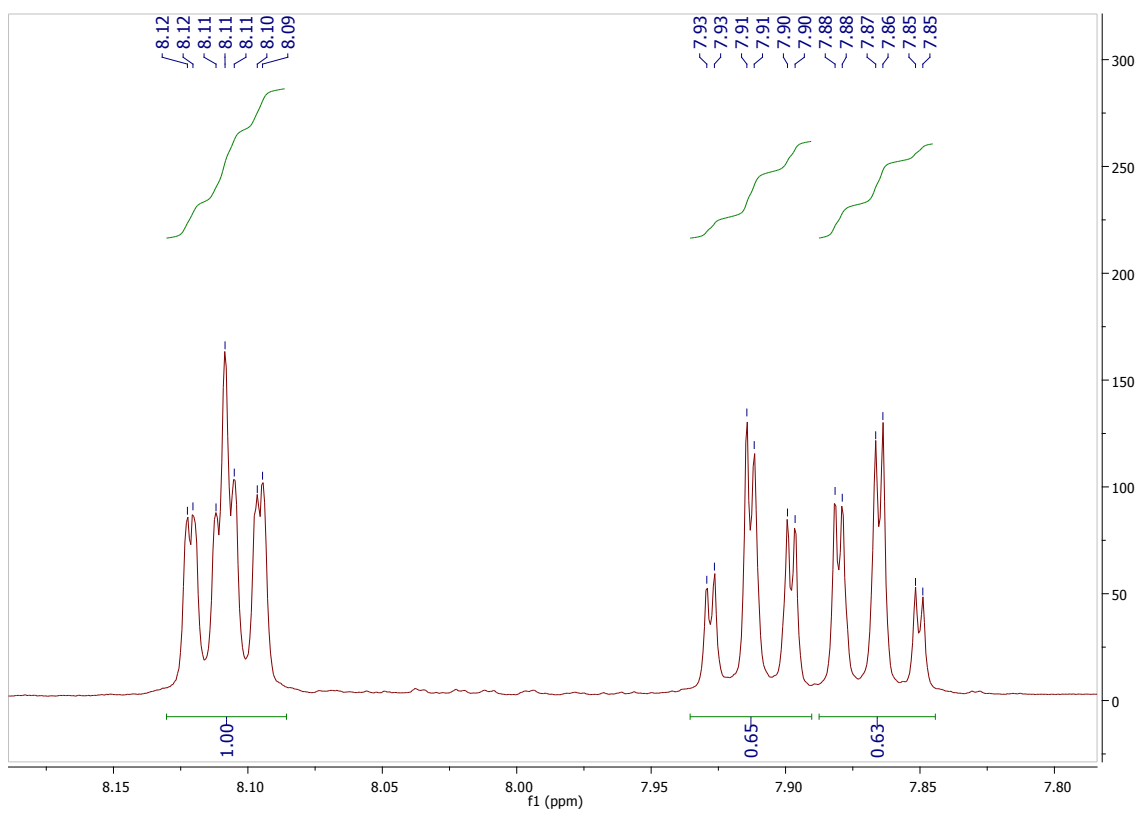

Figure S5 -  $^1\text{H}$  NMR Spectra of 2-amino-3-iodonaphthalene-1,4-dione (**7**)

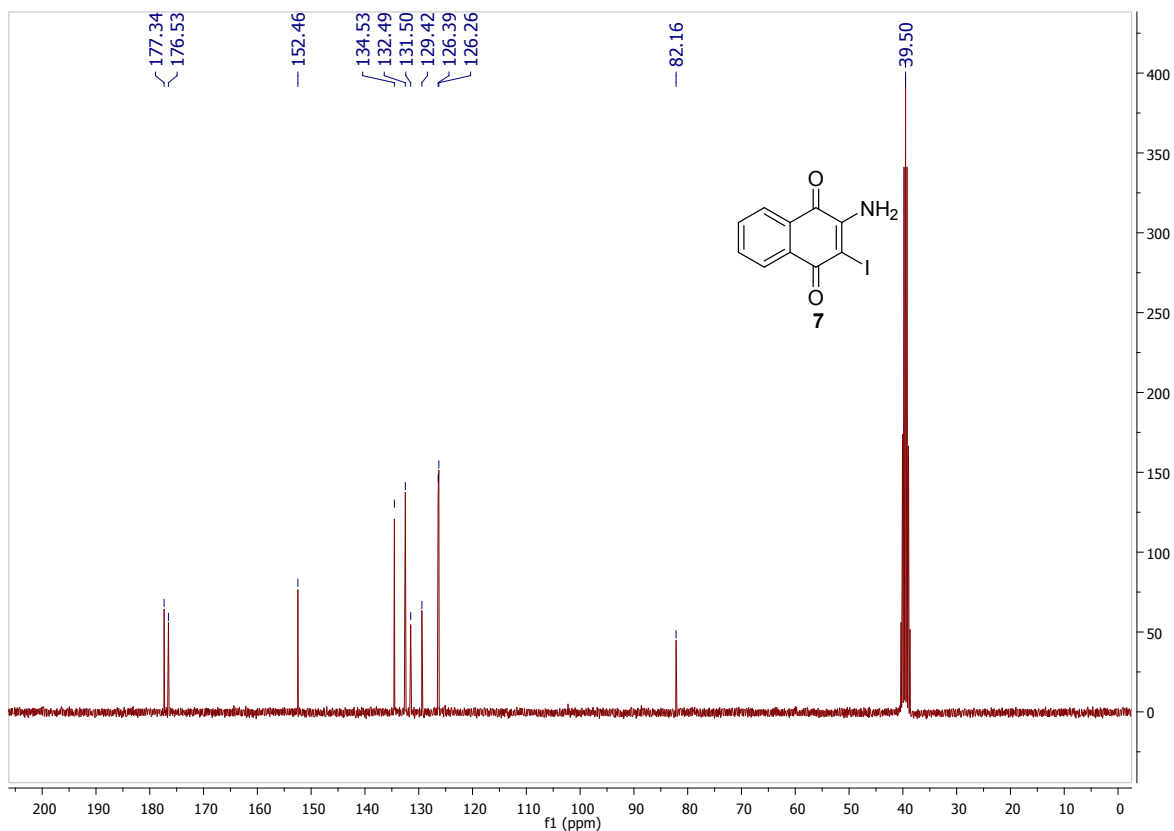

Figure S6 -  $^{13}\text{C}$  NMR Spectra of 2-amino-3-iodonaphthalene-1,4-dione (7)

### 2-Bromo-3-hydroxynaphthalene-1,4-dione (8)

Agilent Resolutions Pro

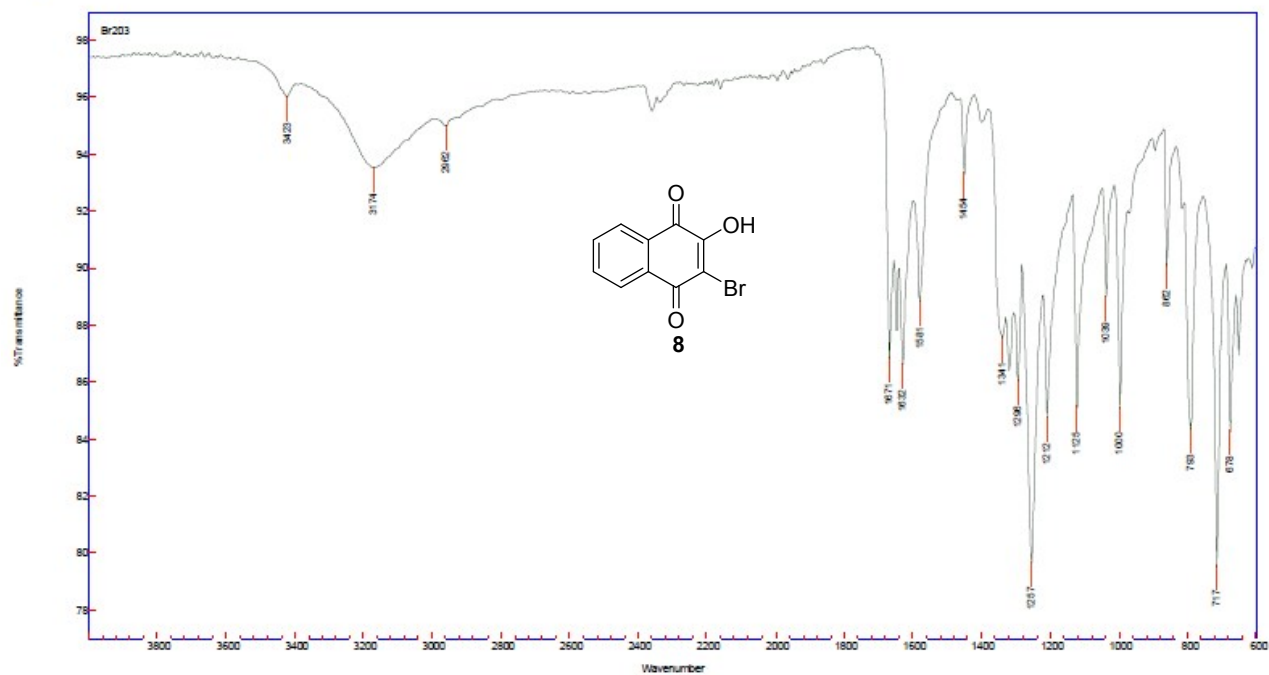

Figure S7 - Infrared spectrum of 2-bromo-3-hydroxynaphthalene-1,4-dione (8)

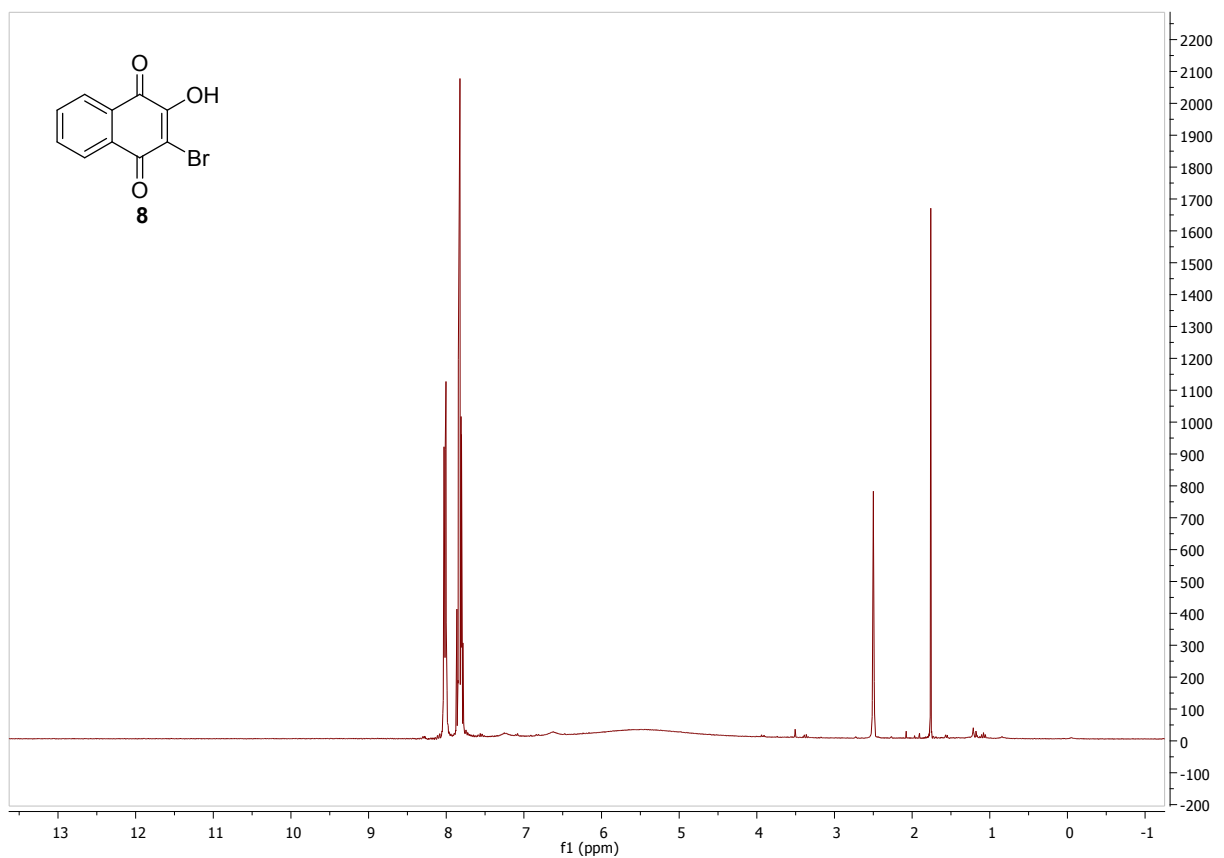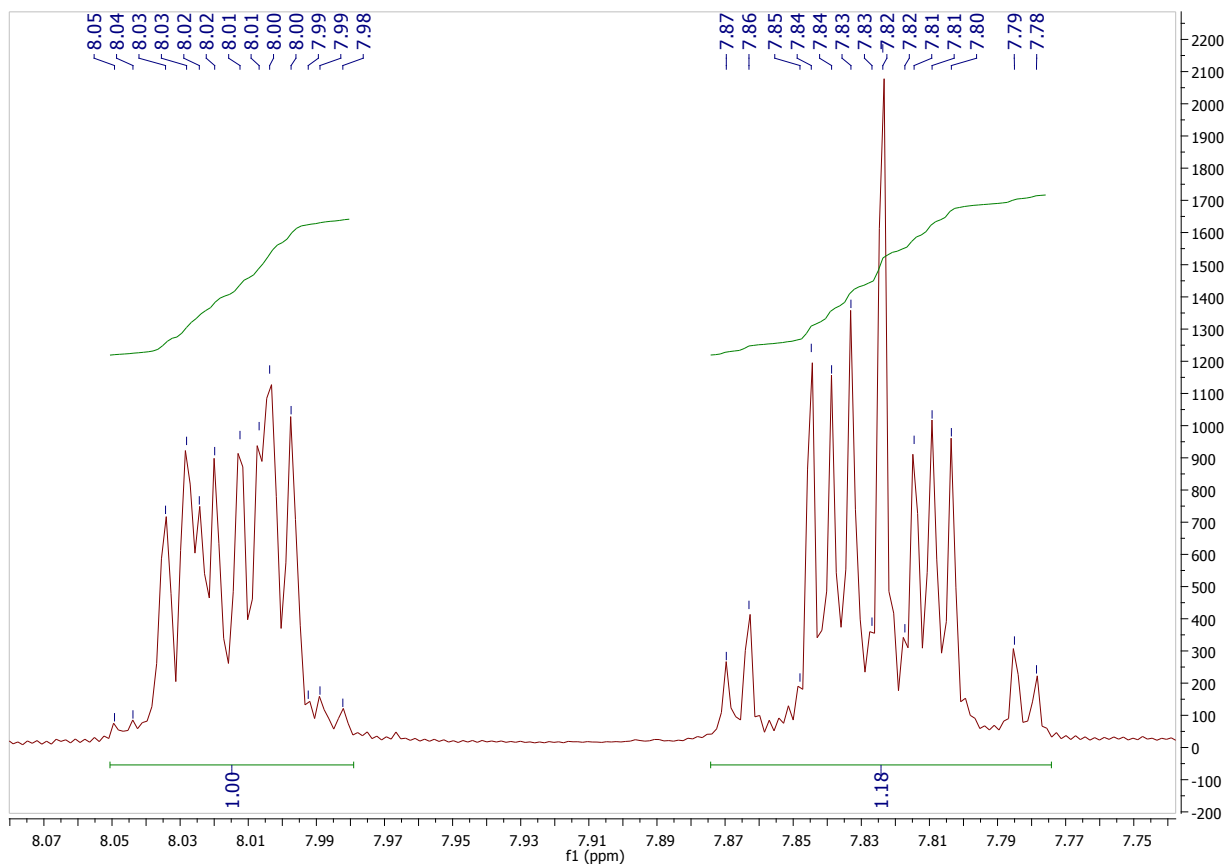

Figure S8 -  $^1\text{H}$  NMR Spectra of 2-bromo-3-hydroxynaphthalene-1,4-dione (**8**)

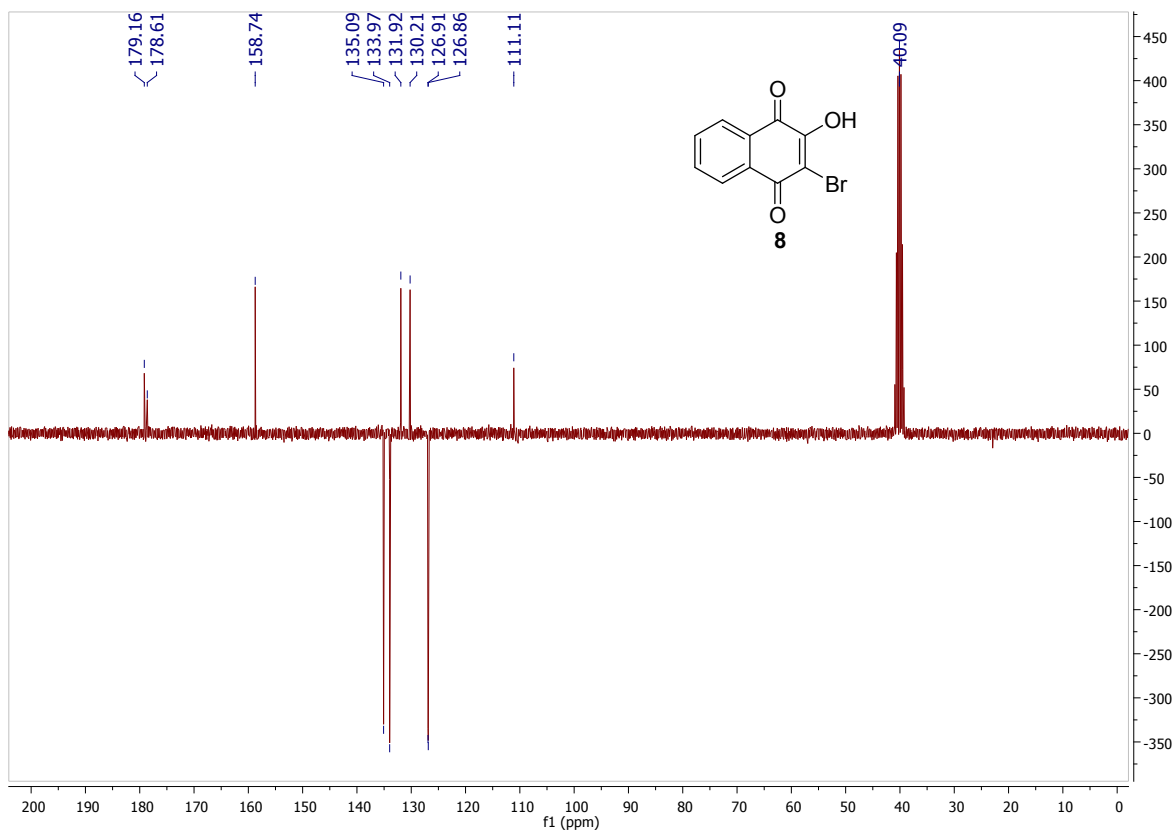

Figure S9 -  $^{13}\text{C}$  NMR Spectra of 2-bromo-3-hydroxynaphthalene-1,4-dione (**8**)

### 2-Hydroxi-3-phenylnaphthalene-1,4-dione (**10a**)

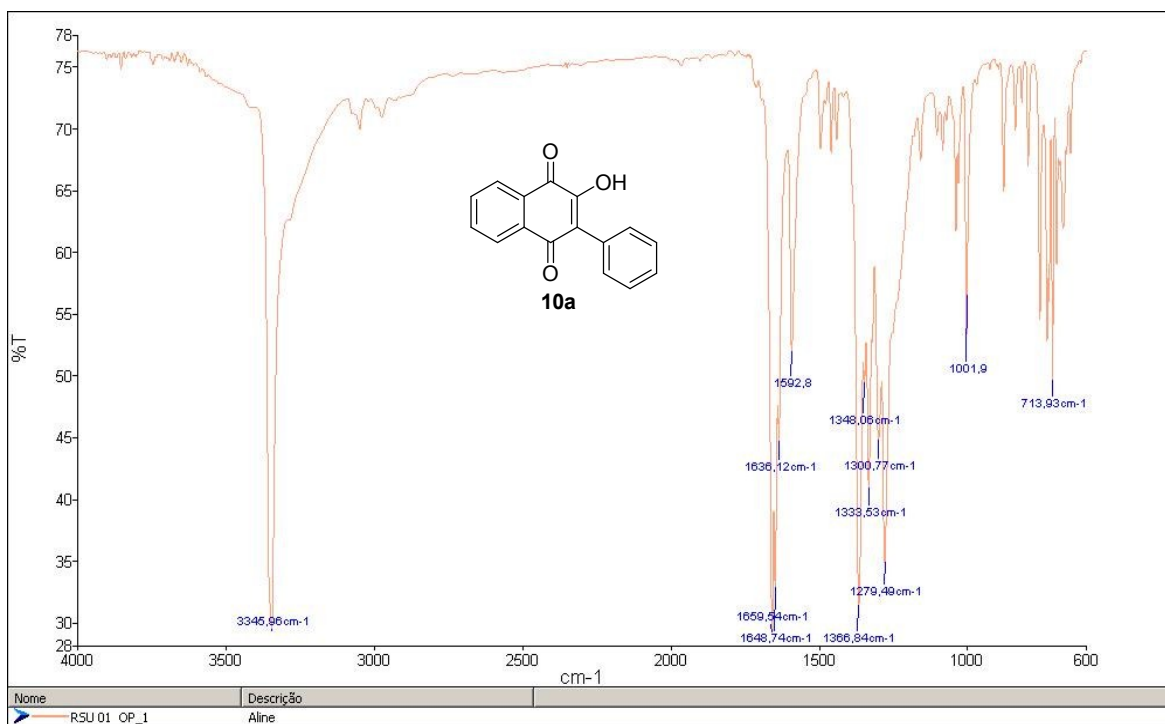

Figure S10 - Infrared Spectrum of 2-hydroxi-3-phenylnaphthalene-1,4-dione (**10a**)

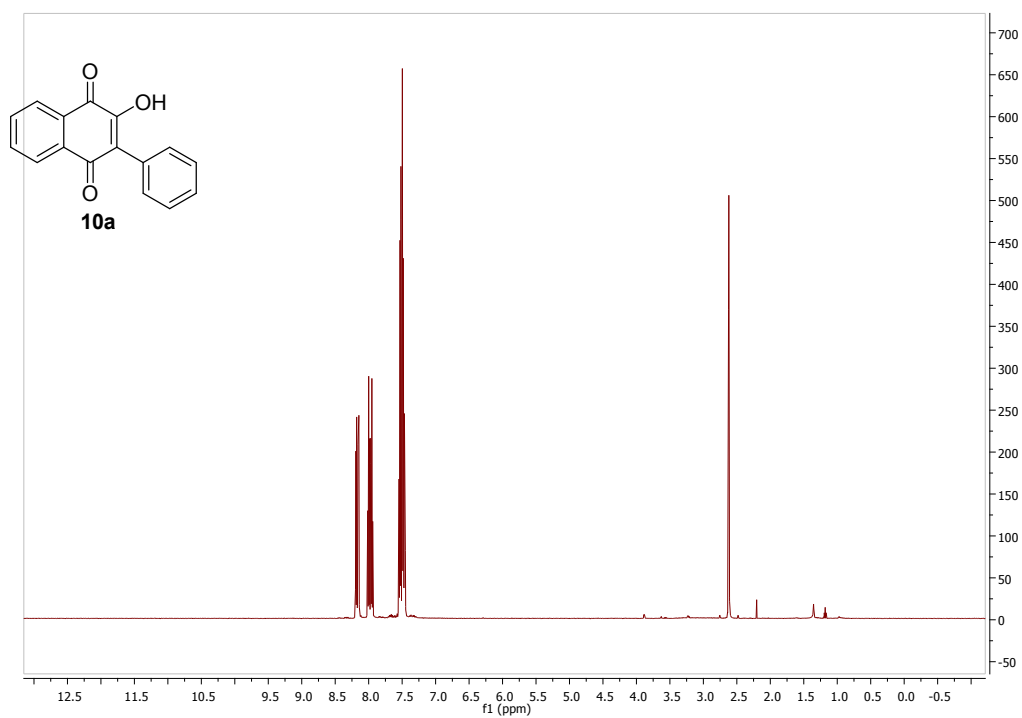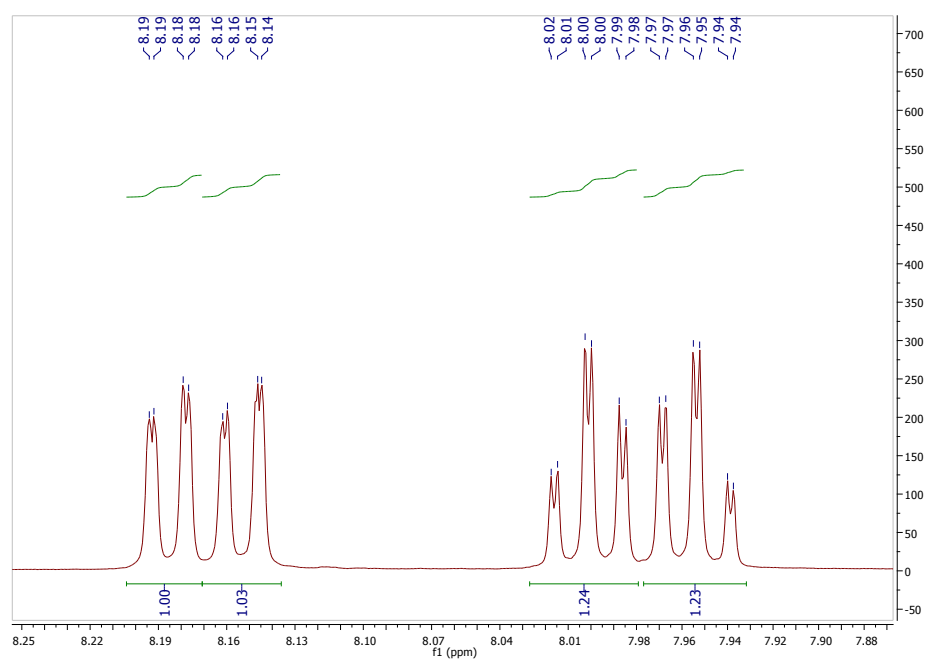

**Figure S11** –  $^1\text{H}$  NMR Spectrum of 2-hydroxy-3-phenylnaphthalene-1,4-dione (**10a**)



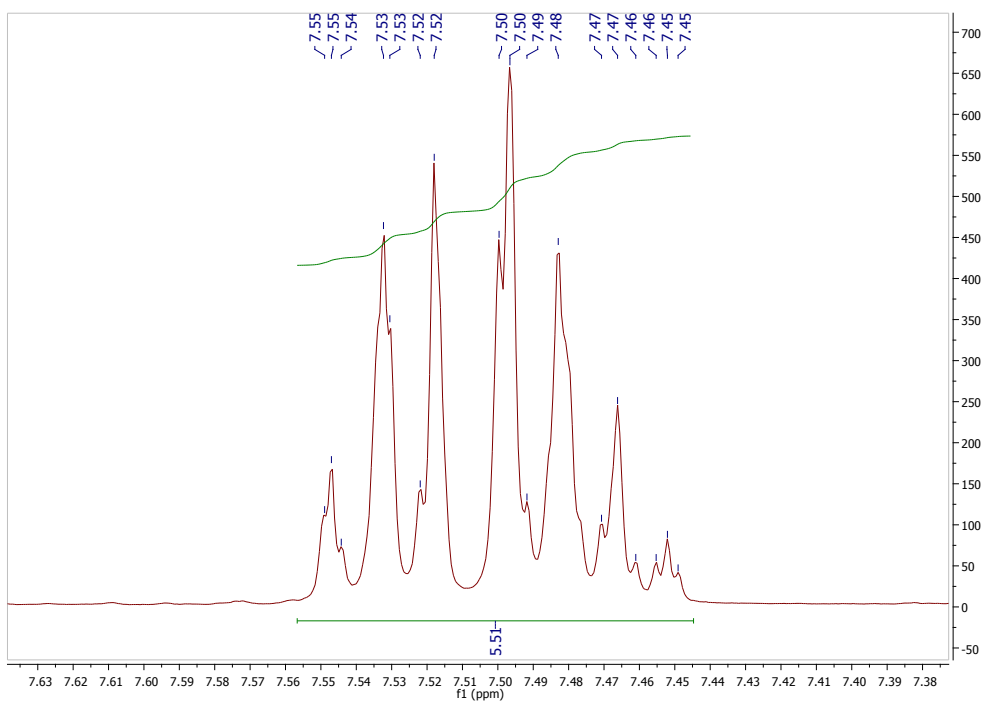

Figure S12  $^1\text{H}$  NMR Spectra of 2-hydroxy-3-phenylnaphthalene-1,4-dione (**10a**)

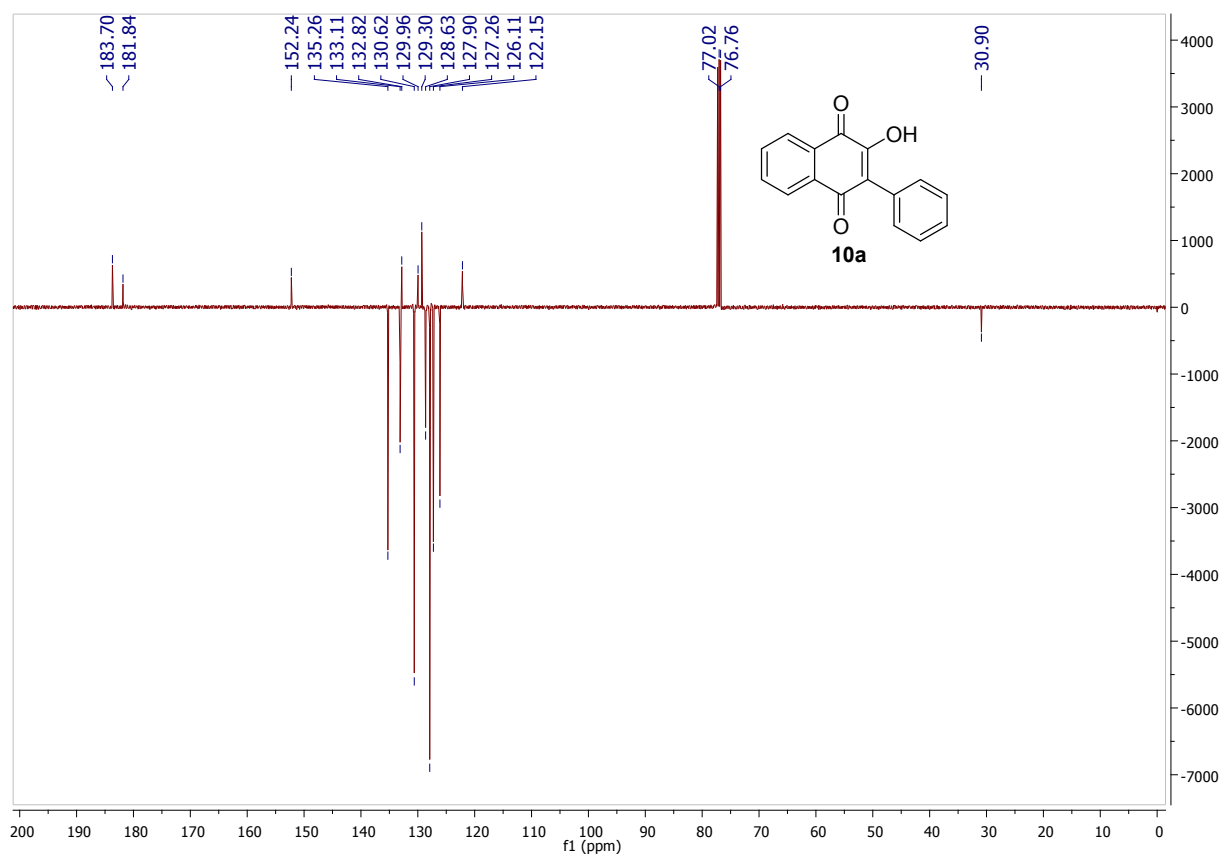

Figure S13  $^{13}\text{C}$  NMR Spectra of 2-hydroxy-3-phenylnaphthalene-1,4-dione (**10a**)

## 2-(4-Fluorophenyl)-3-phenylnaphthalene-1,4-dione (10b)

Agilent Resolutions Pro

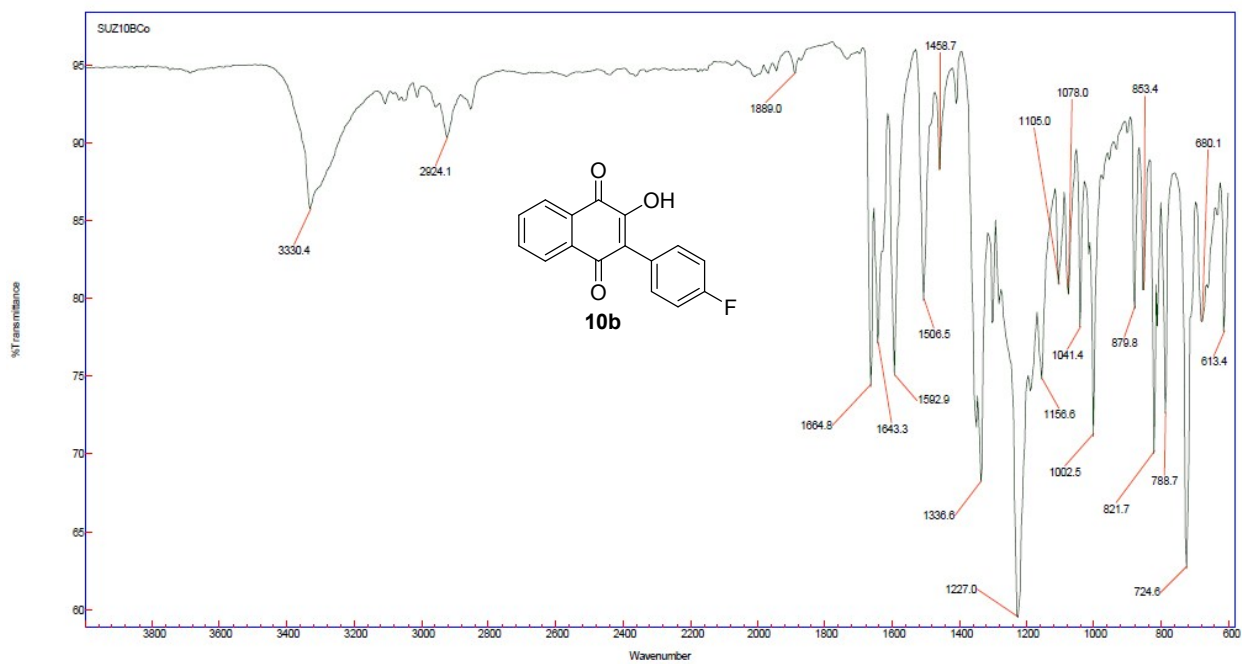

Figure S14 Infrared spectrum of 2-(4-fluorophenyl)-3-phenylnaphthalene-1,4-dione (10b)

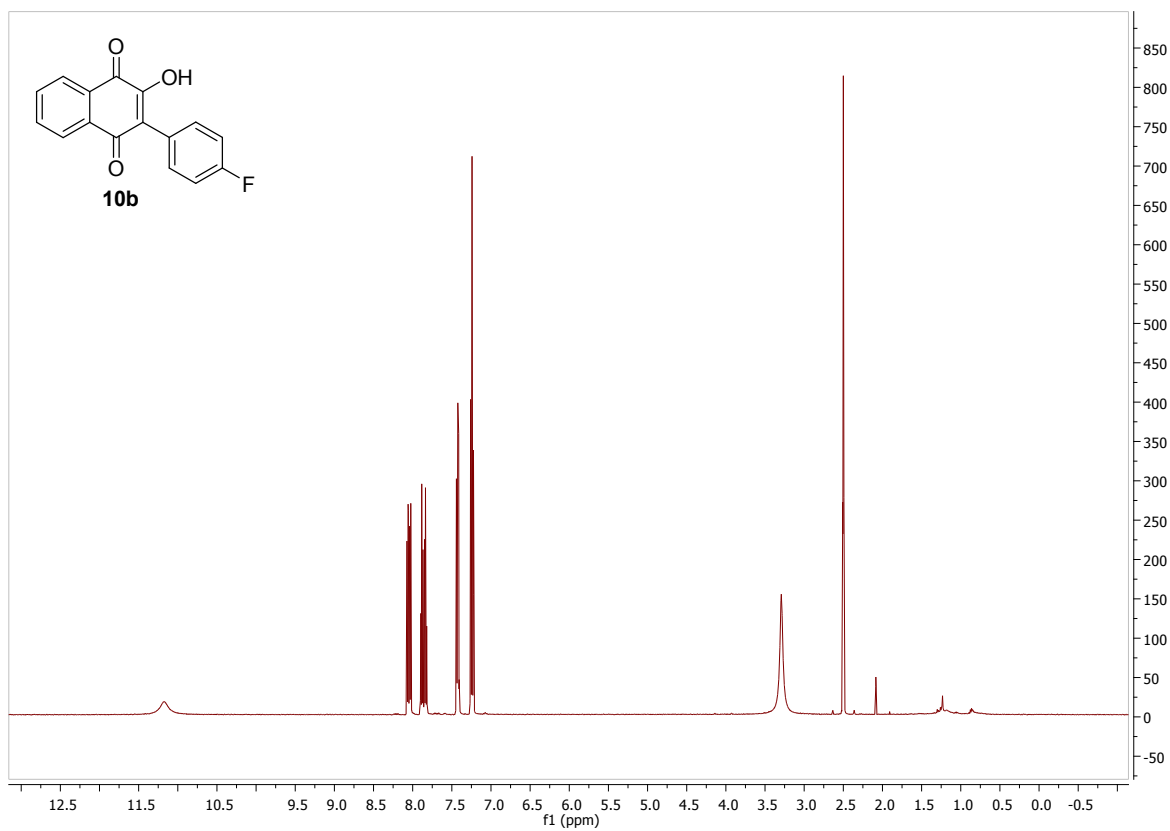

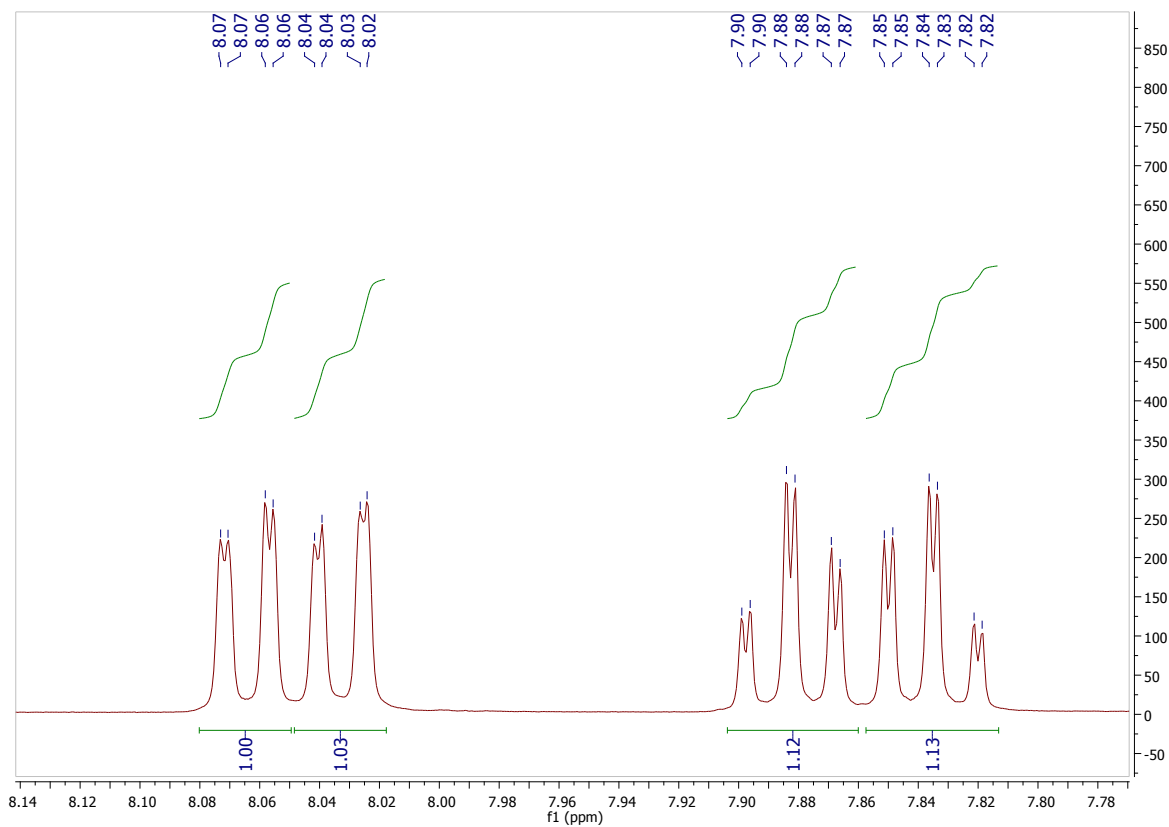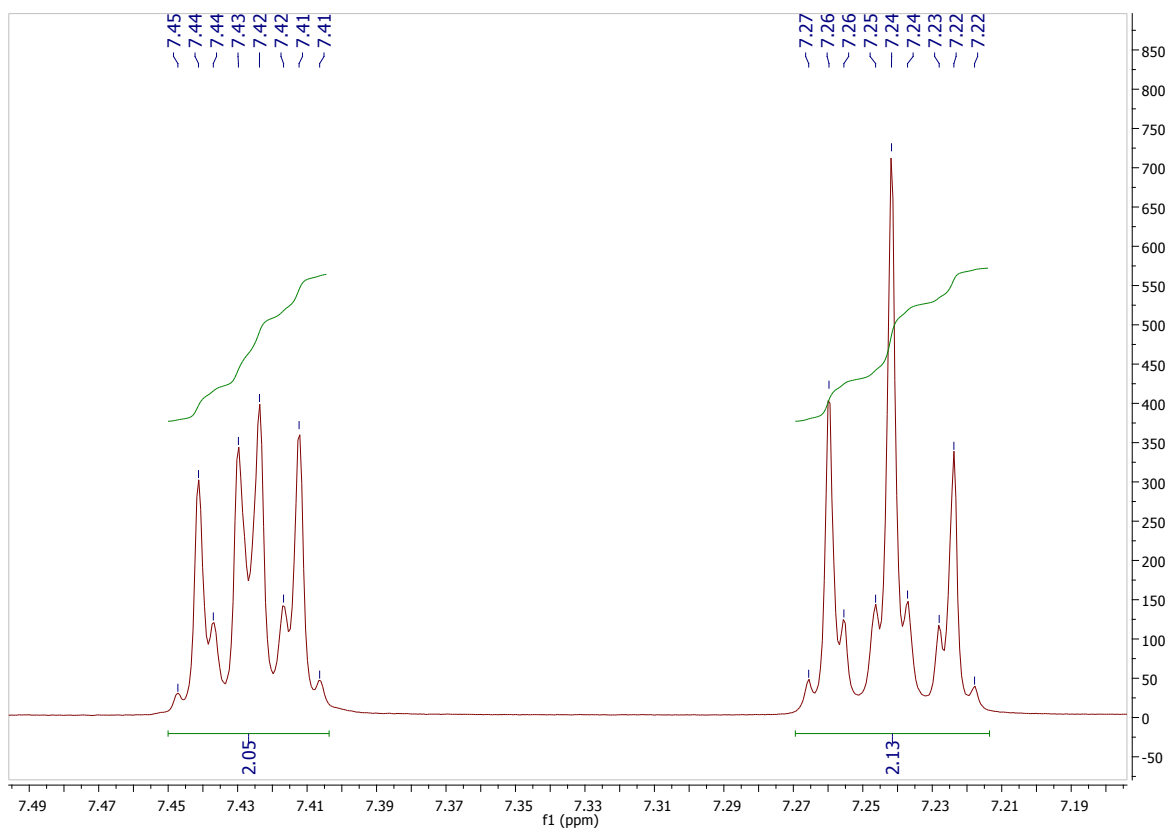

Figure S15 -  $^1\text{H}$  NMR Spectra of 2-(4-fluorophenyl)-3-phenylnaphthalene-1,4-dione (**10b**)

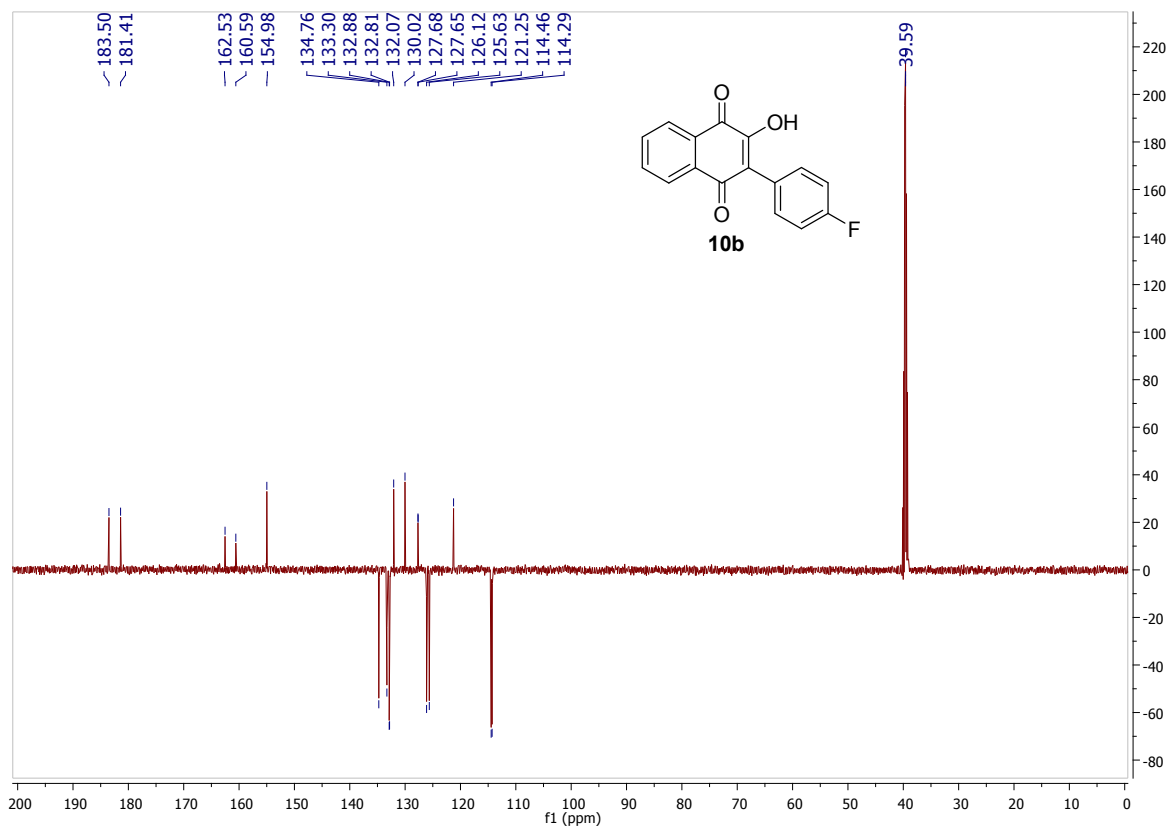

Figure S16 - <sup>13</sup>C NMR Spectra of 2-(4-fluorophenyl)-3-phenylnaphthalene-1,4-dione (**10b**)

2-(3-Fluorophenyl)-3-phenylnaphthalene-1,4-dione (**10c**)

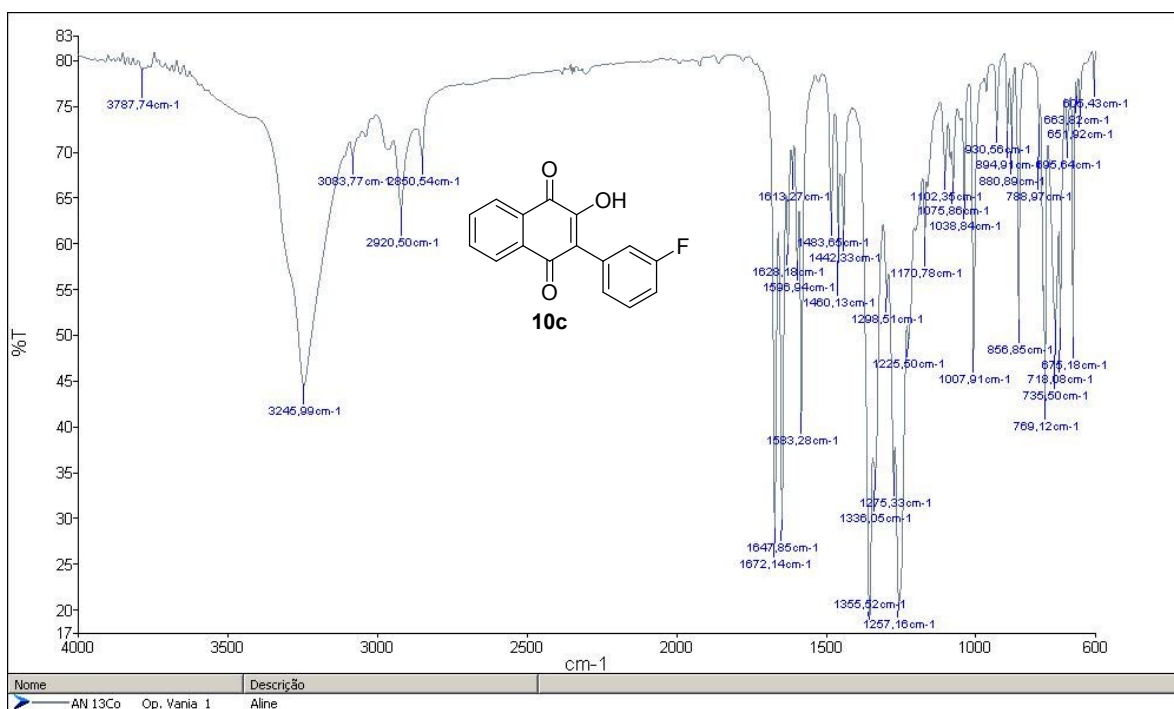

Figure S17 Infrared spectrum of 2-(3-fluorophenyl)-3-phenylnaphthalene-1,4-dione (**10c**)

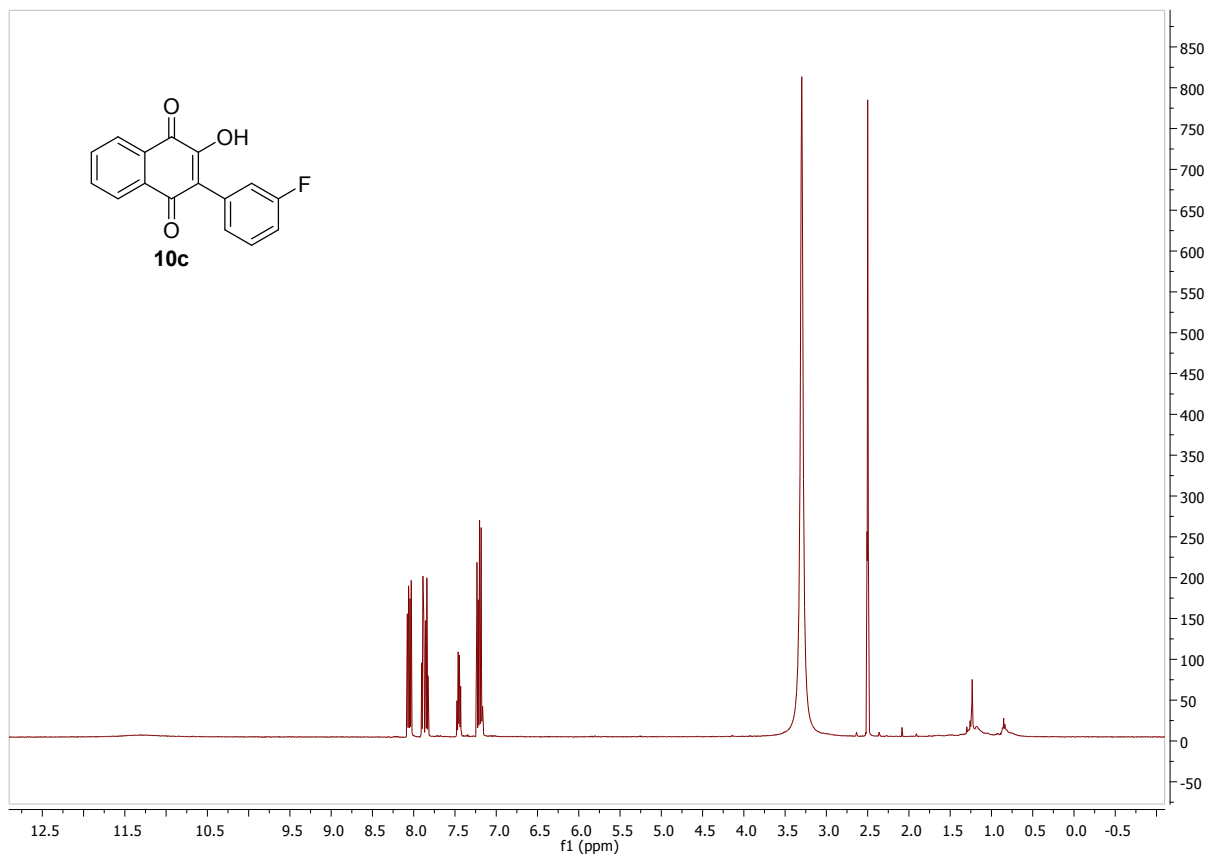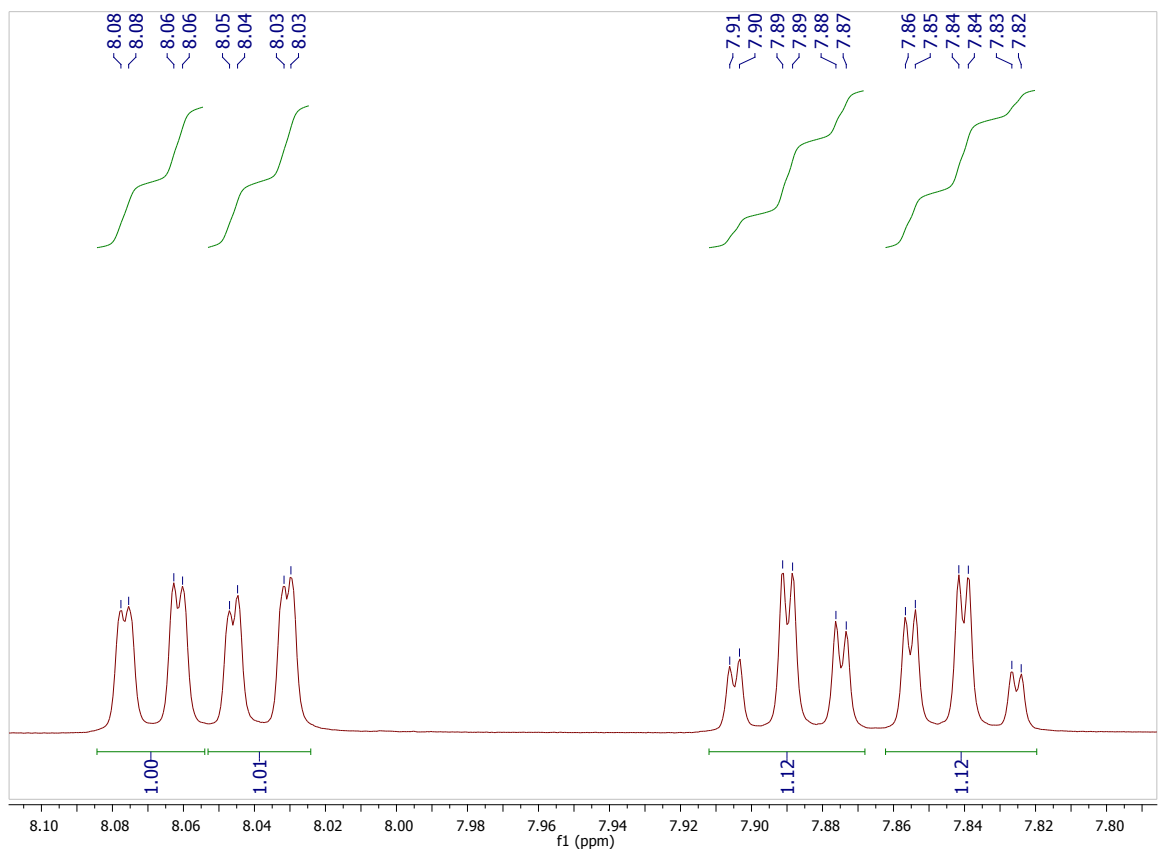

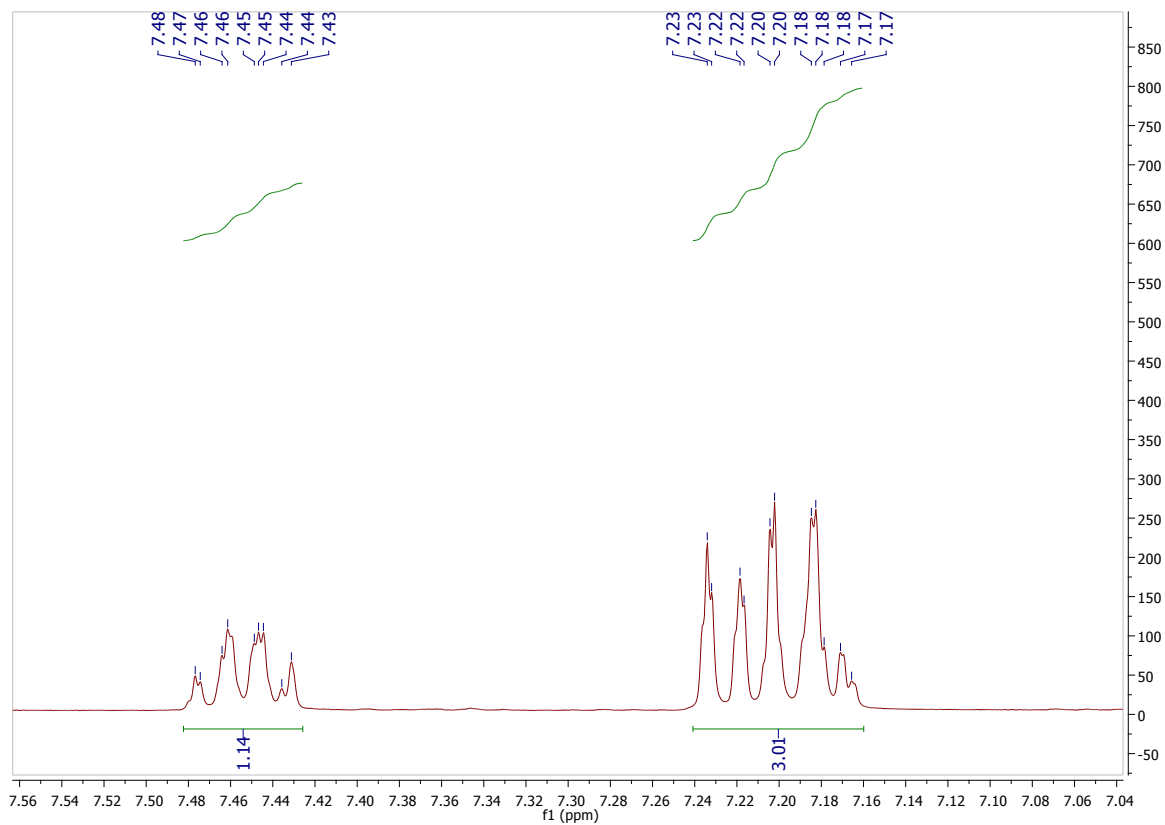

Figure S18 -  $^1\text{H}$  NMR Spectra of 2-(3-fluorophenyl)-3-phenylnaphthalene-1,4-dione (**10c**)

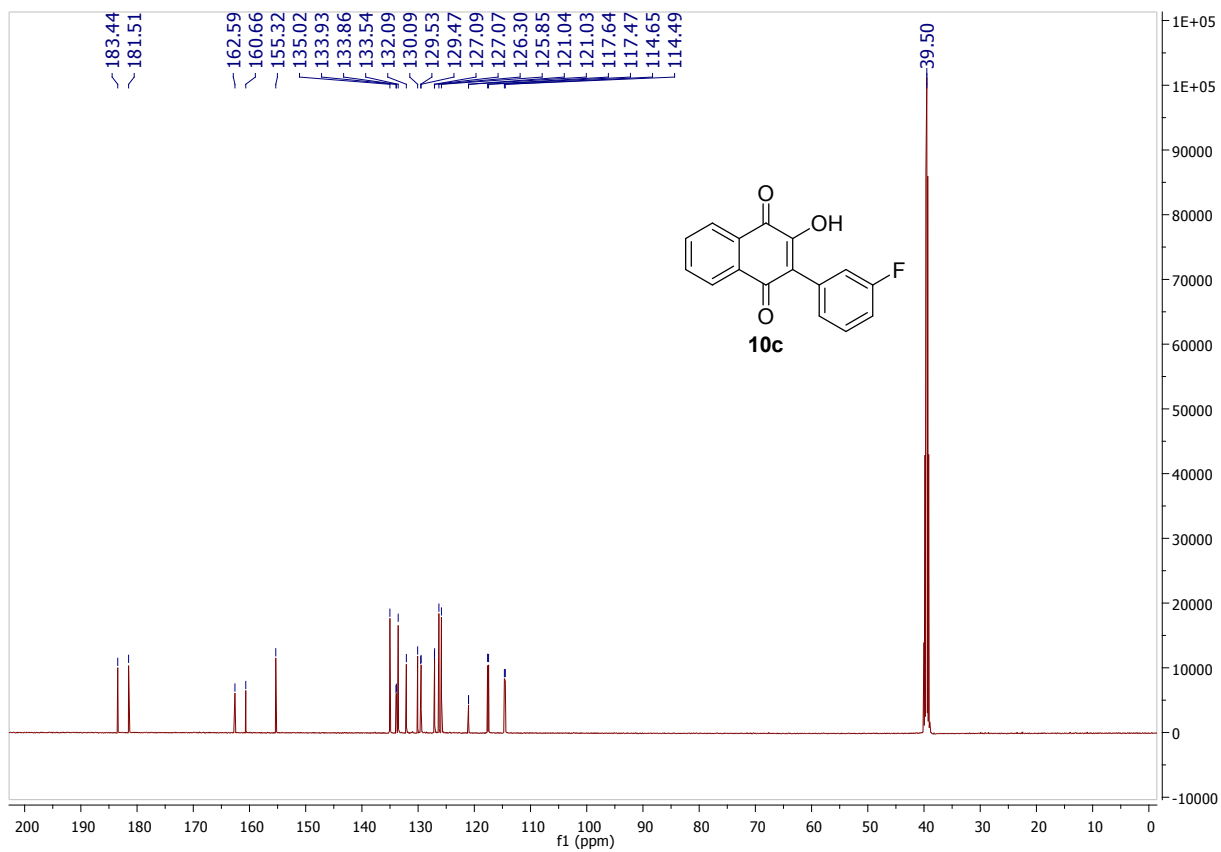

Figure S19 -  $^{13}\text{C}$  NMR Spectra of 2-(3-fluorophenyl)-3-phenylnaphthalene-1,4-dione (**10c**)

### 2-Hydroxy-3-(thiophen-2-yl)naphthalene-1,4-dione (10d)

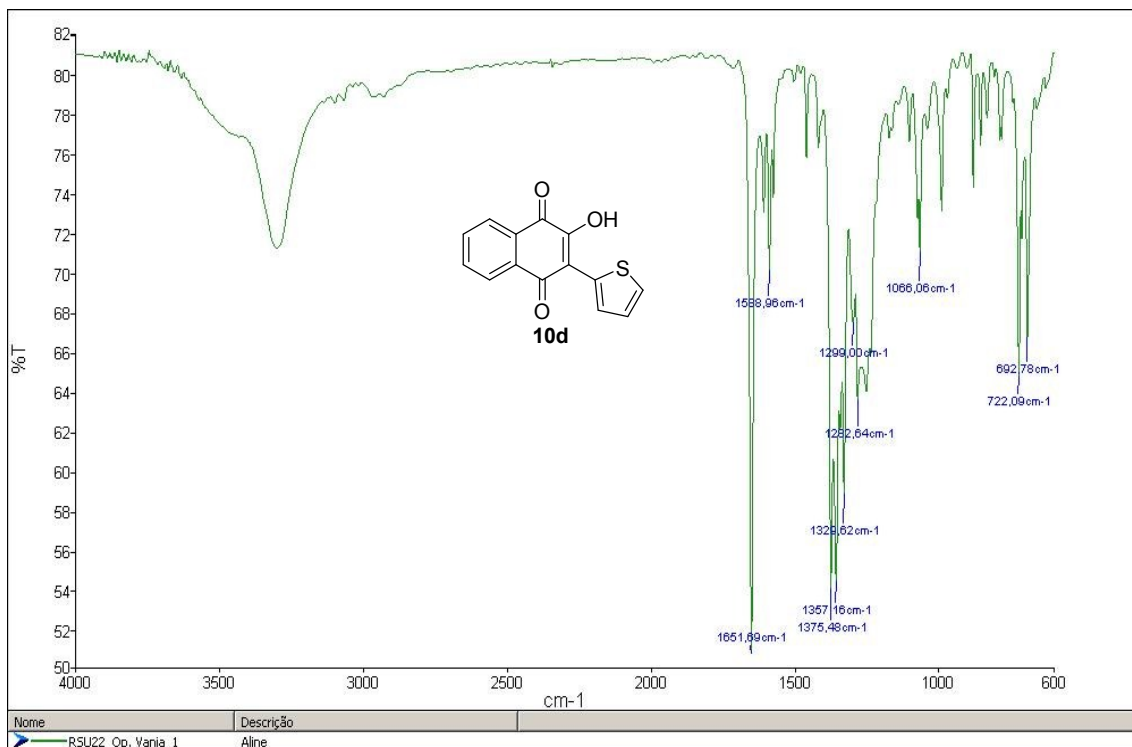

Figure S20 - Infrared spectrum of 2-hydroxy-3-(thiophen-2-yl)naphthalene-1,4-dione (10d)

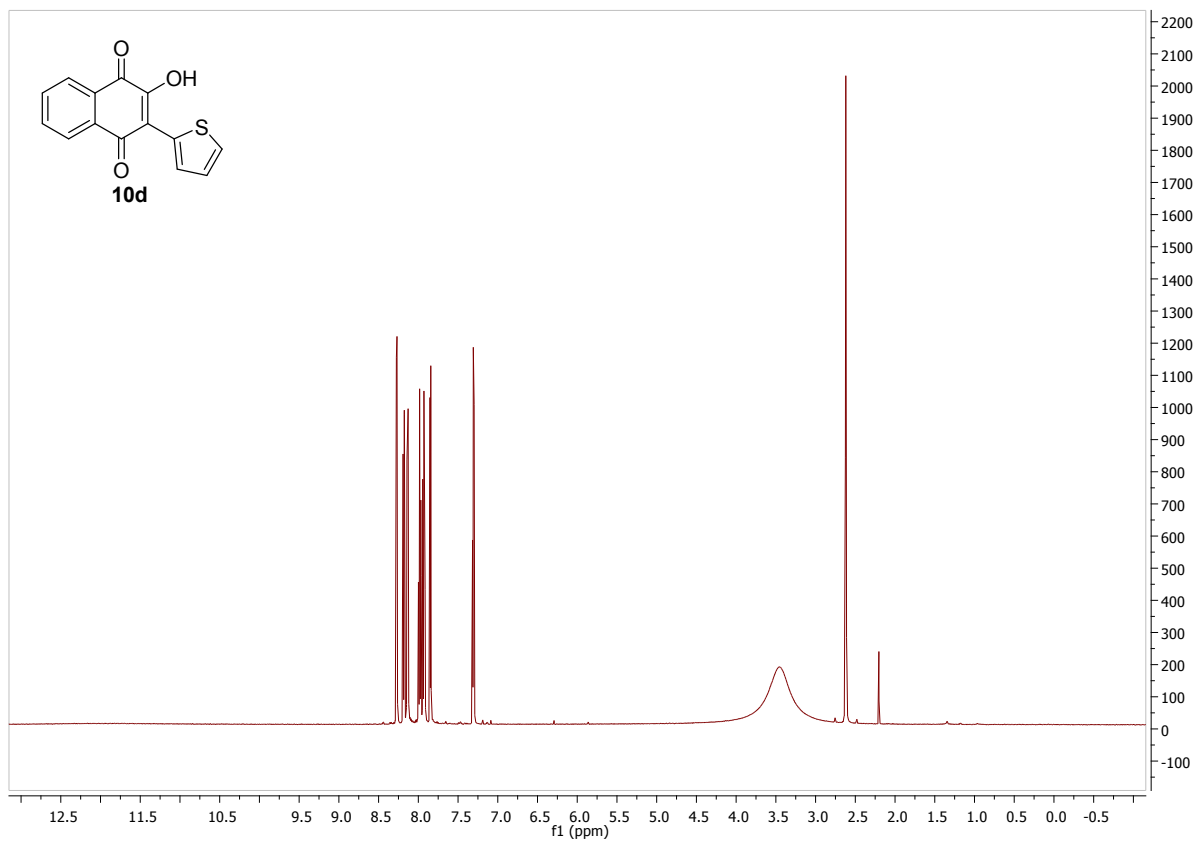

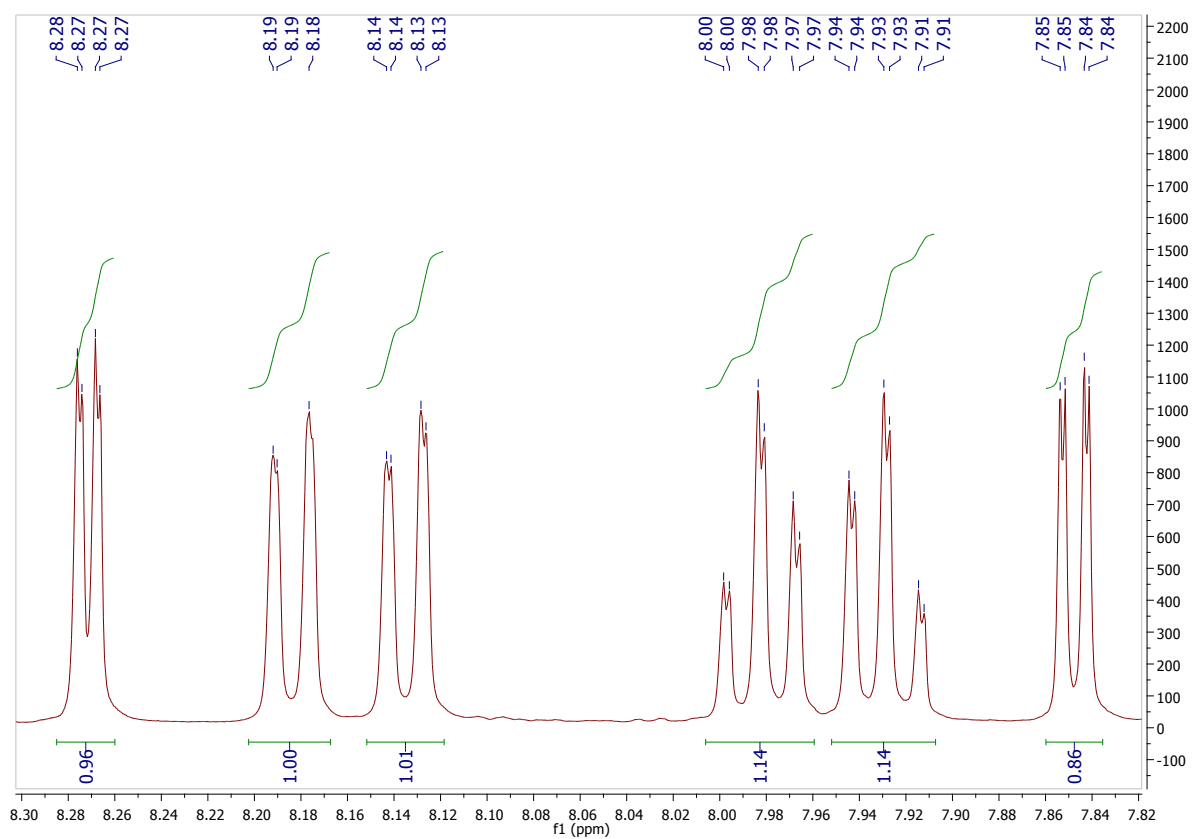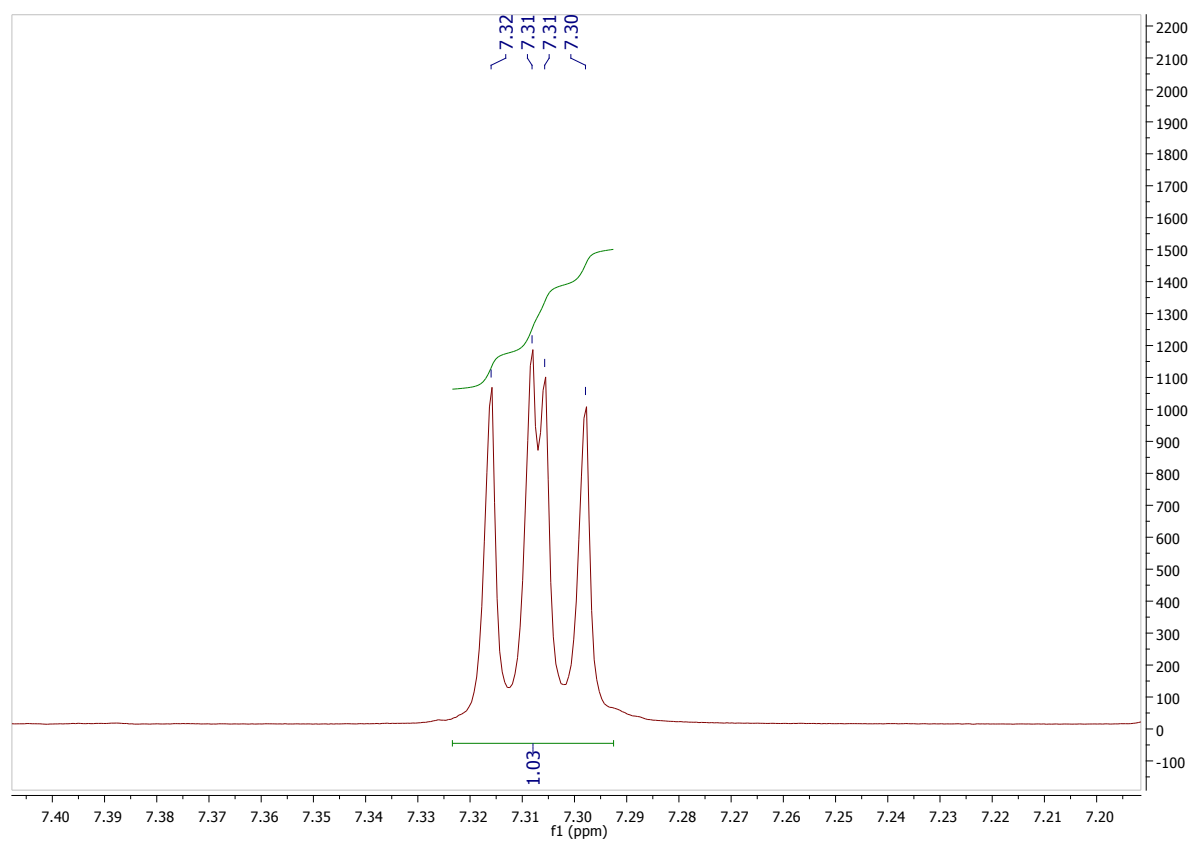

**Figure S21** - <sup>1</sup>H NMR Spectra of 2-hydroxy-3-(thiophen-2-yl)naphthalene-1,4-dione (**10d**)



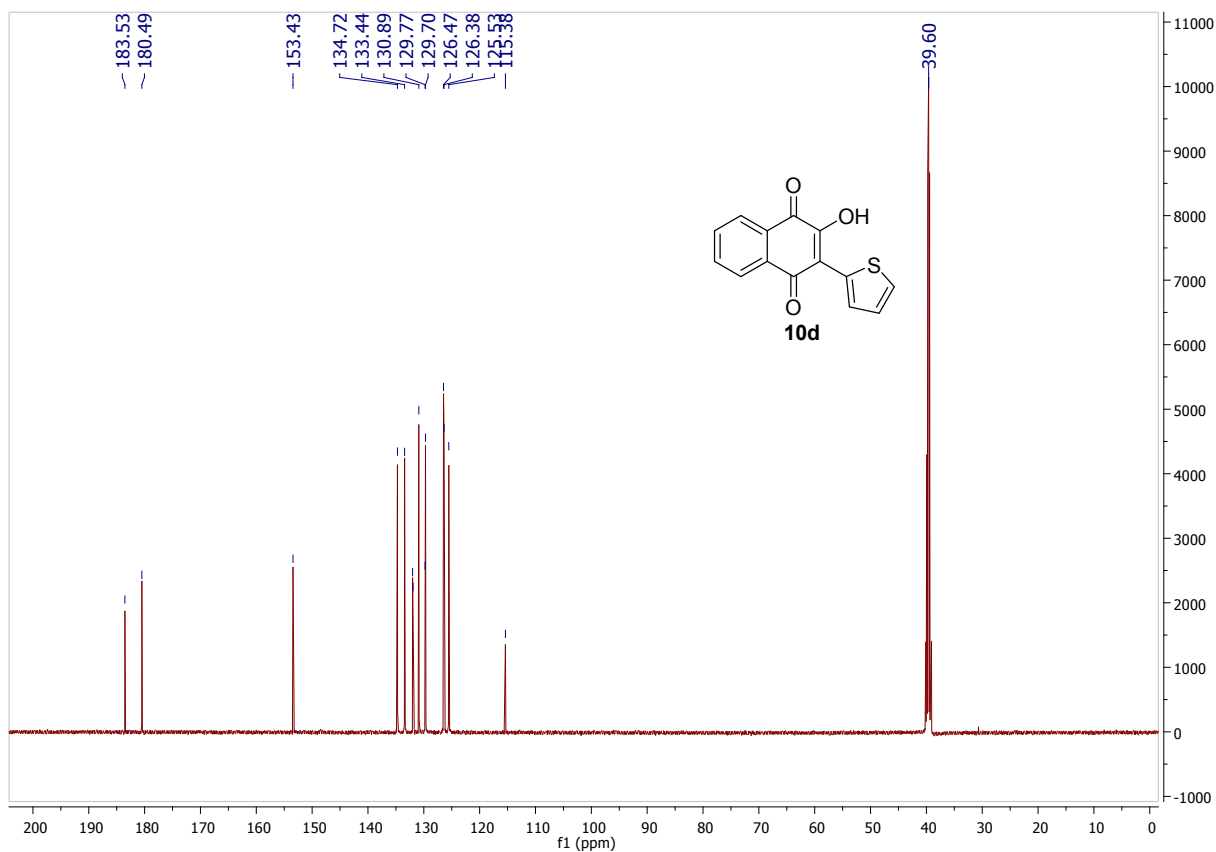

Figure S22 - <sup>13</sup>C NMR Spectra of 2-hydroxy-3-(thiophen-2-yl)naphthalene-1,4-dione (**10d**)

2-Hydroxy-3-(thiophen-3-yl)naphthalene-1,4-dione (**10e**)

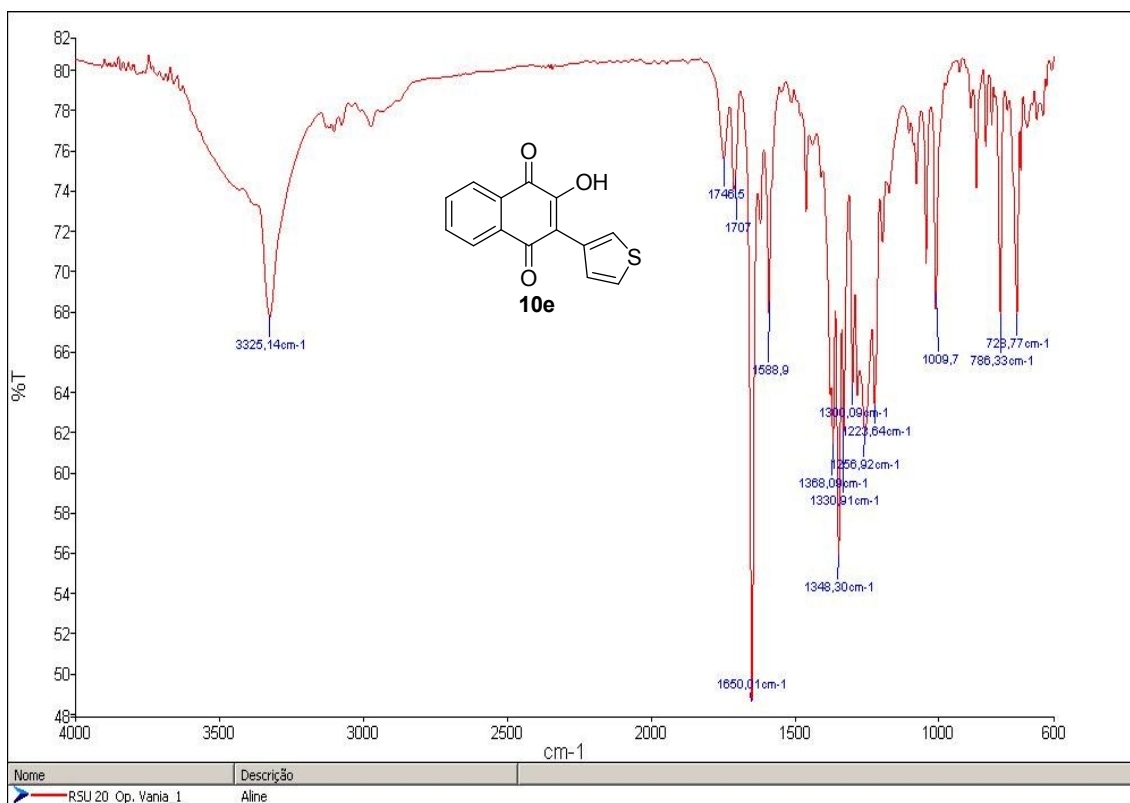

Figure S23 - Infrared spectrum of 2-hydroxy-3-(thiophen-3-yl)naphthalene-1,4-dione (**10e**)

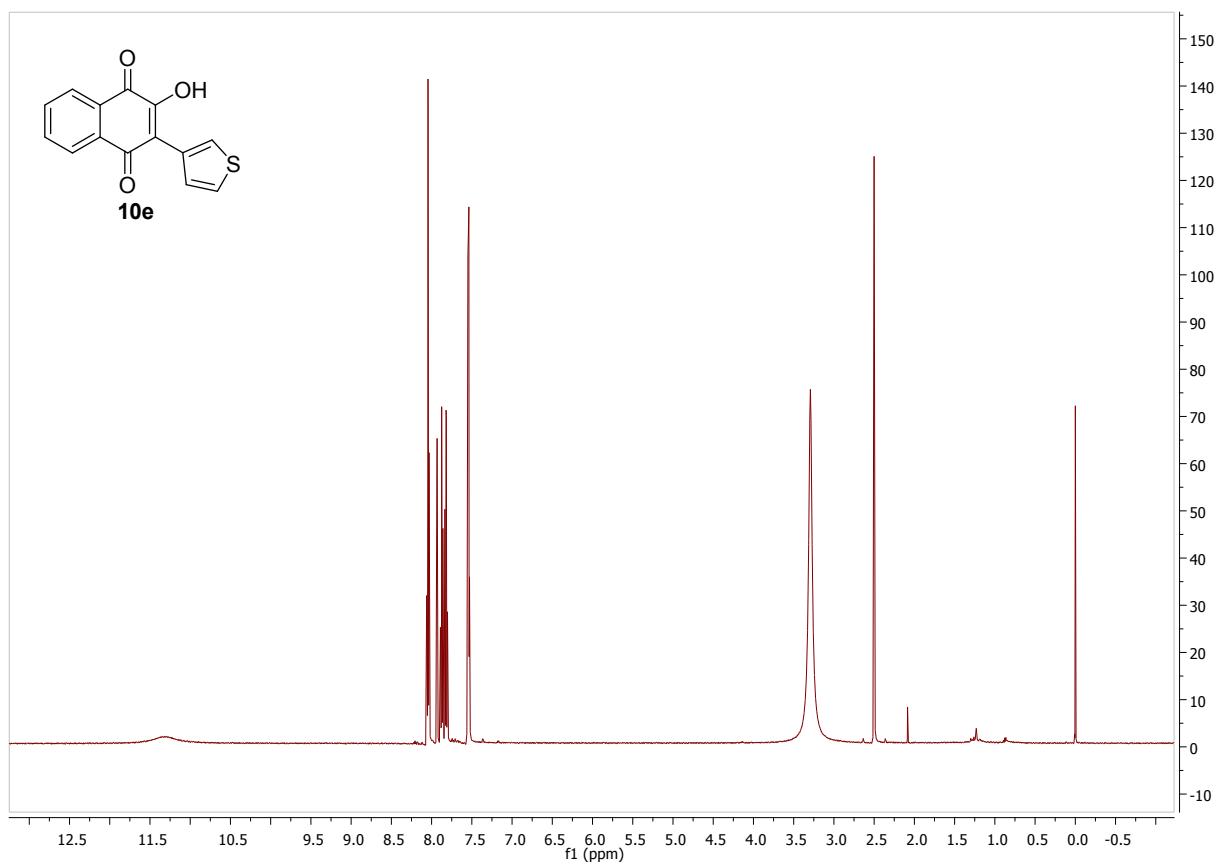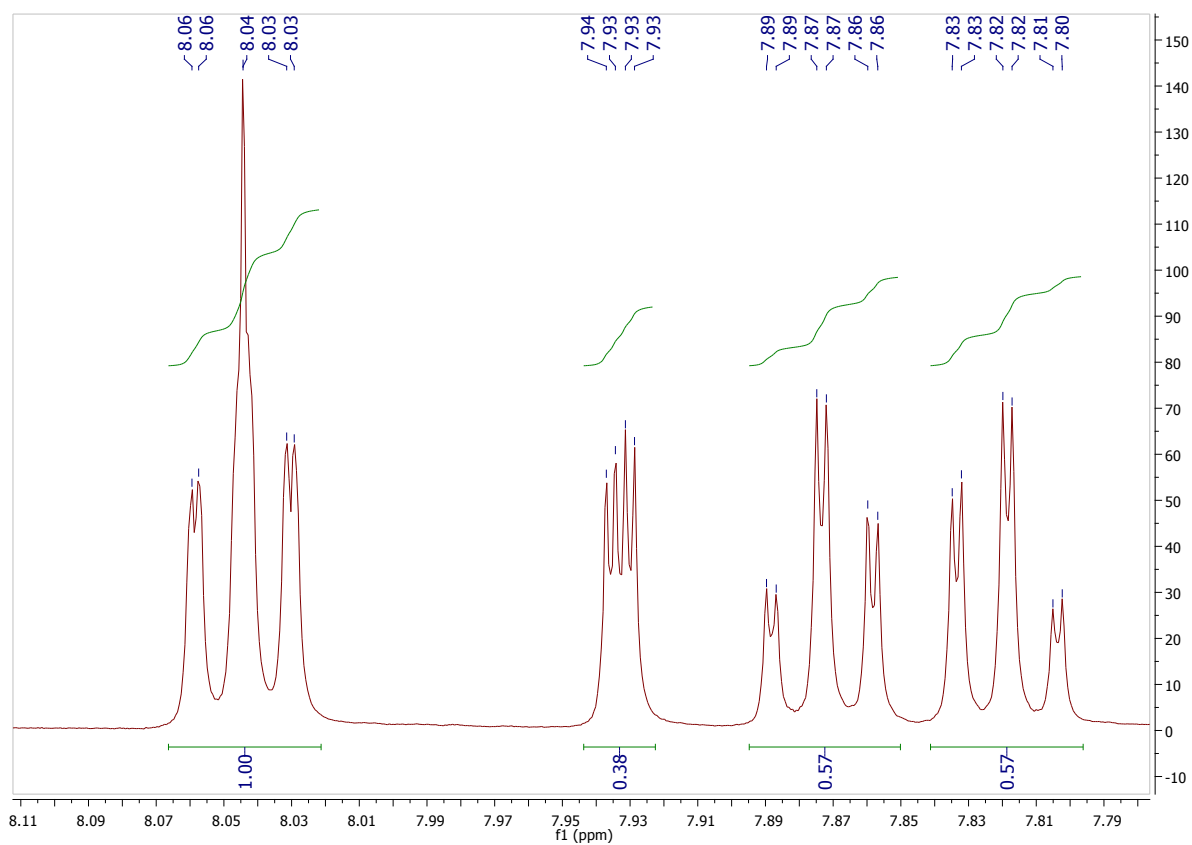

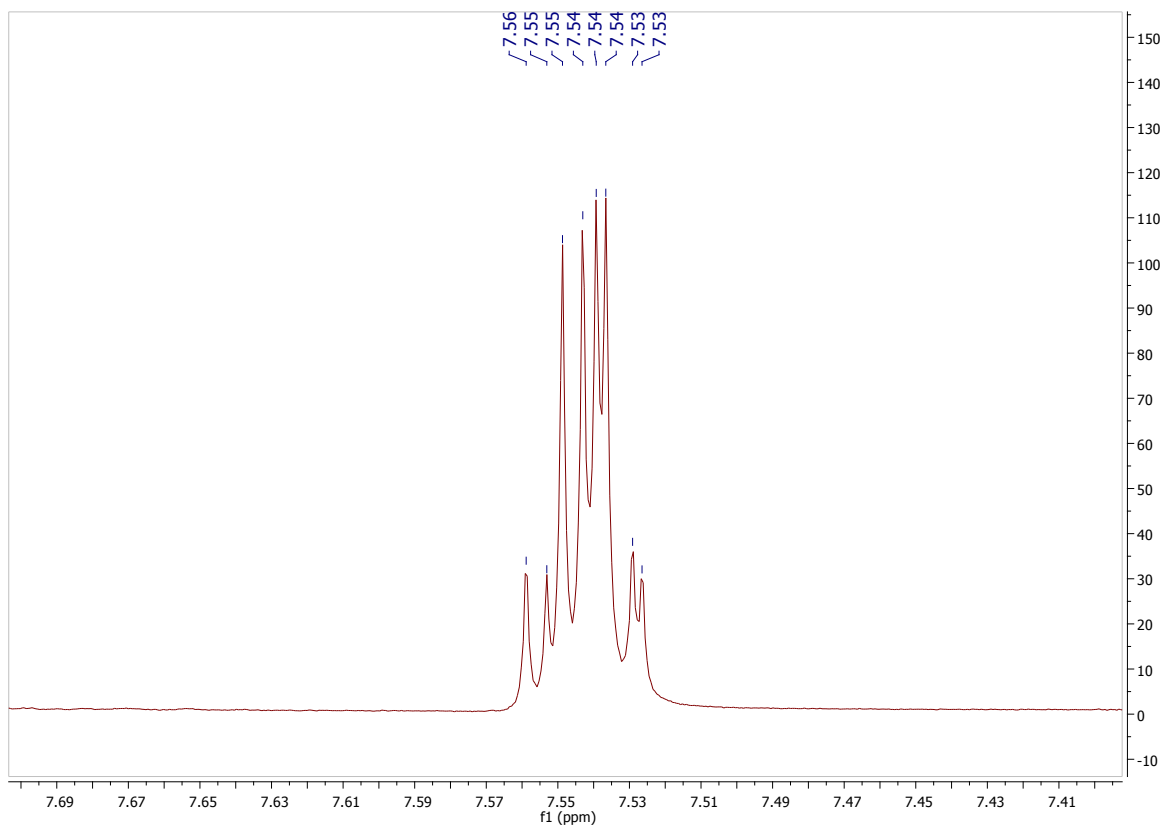

Figure S24 -  $^1\text{H}$  NMR Spectra of 2-hydroxy-3-(thiophen-3-yl)naphthalene-1,4-dione (**10e**)

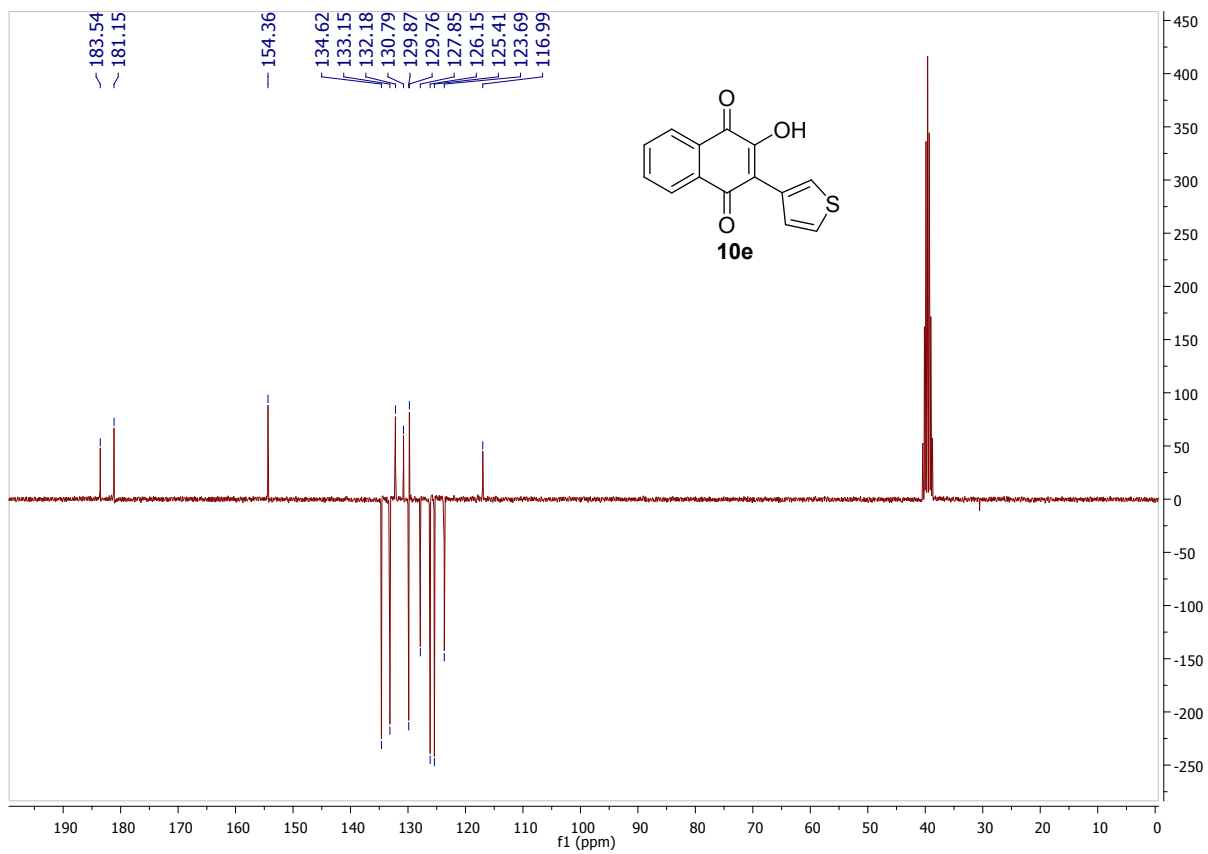

Figure S25 -  $^{13}\text{C}$  NMR Spectra of 2-hydroxy-3-(thiophen-3-yl)naphthalene-1,4-dione (**10e**)

### 3-(3-Hydroxy-1,4-dioxo-1,4-dihydronaphthalen-2-yl)benzaldehyde (10f)

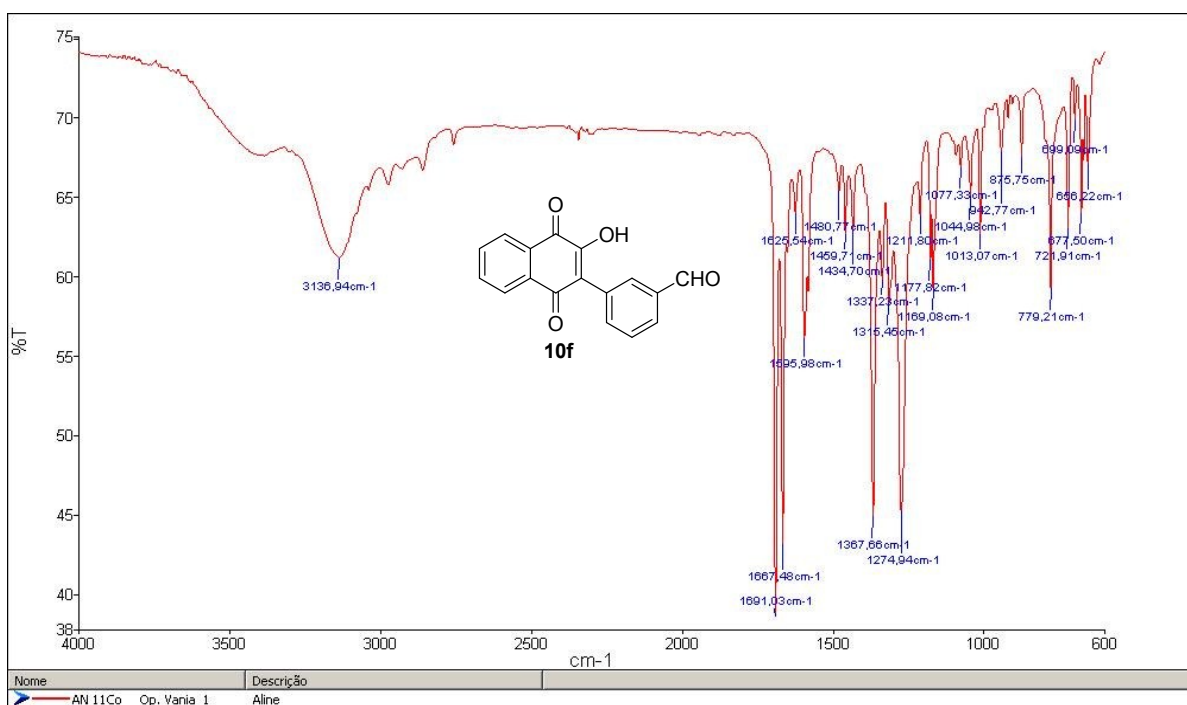

Figure S26 - Infrared spectrum of 3-(3-Hydroxy-1,4-dioxo-1,4-dihydronaphthalen-2-yl)benzaldehyde (10f)

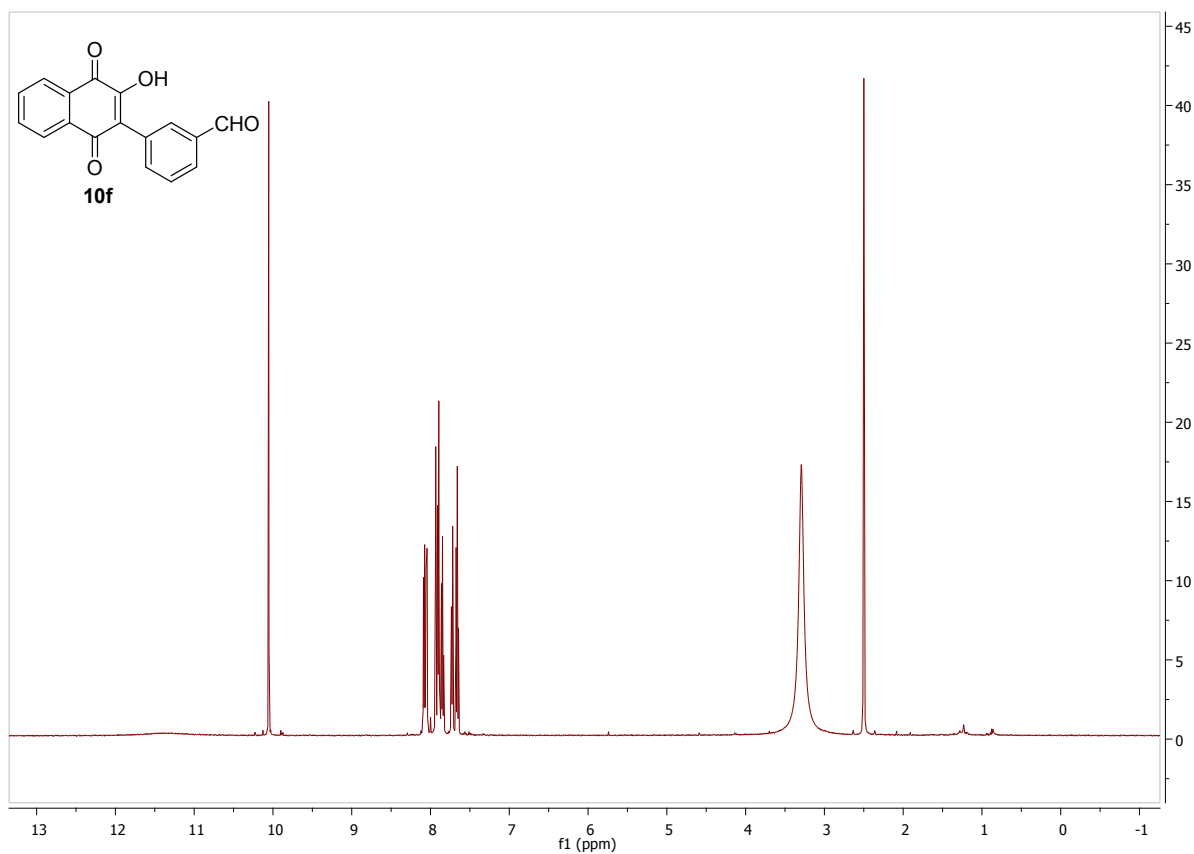

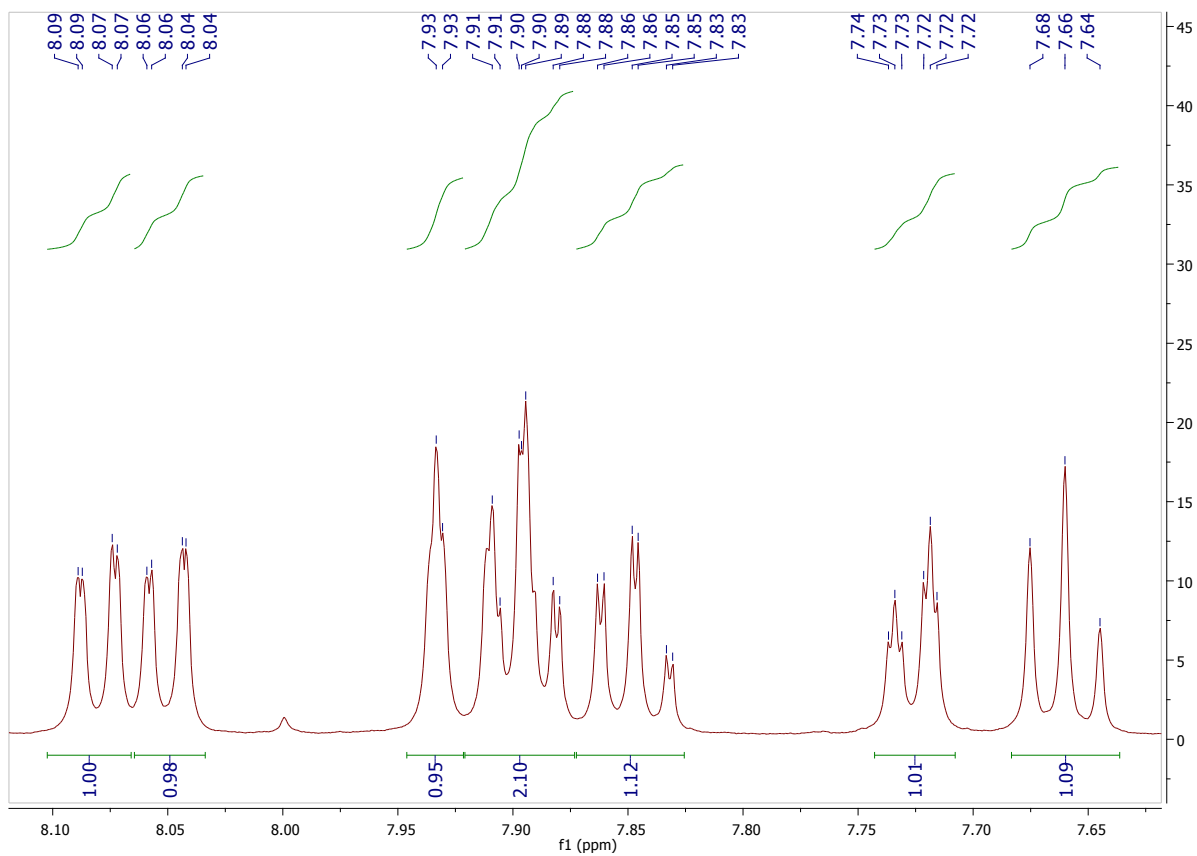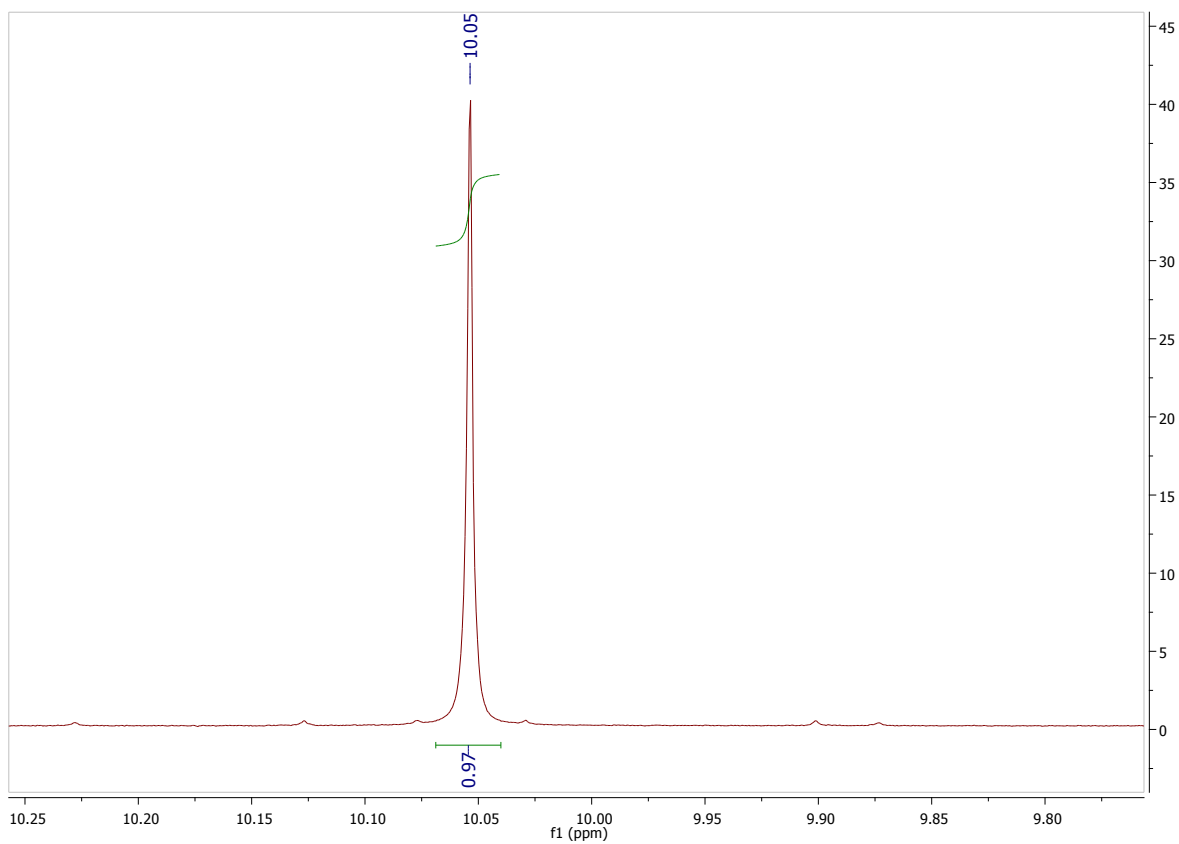

**Figure S27** -  $^1\text{H}$  NMR Spectra of of 3-(3-Hydroxy-1,4-dioxo-1,4-dihydronaphthalen-2-yl)benzaldehyde (10f)

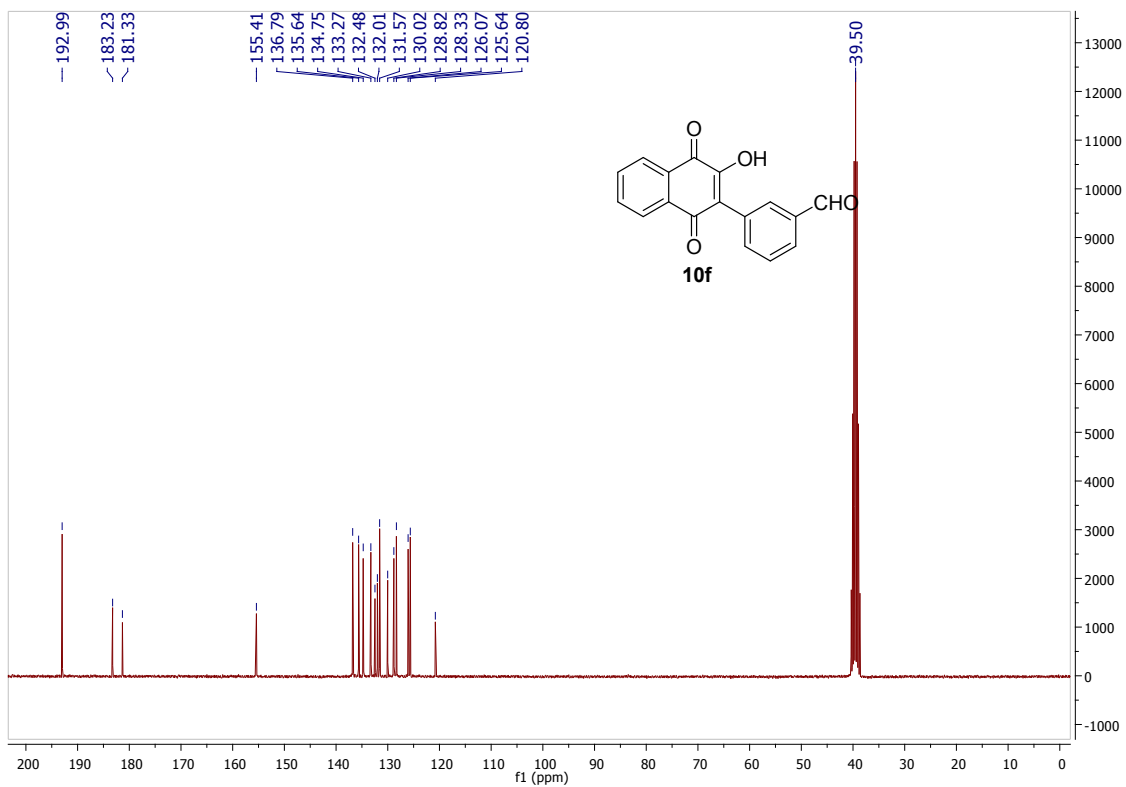

Figure S28 <sup>13</sup>C NMR Spectra of 3-(3-Hydroxy-1,4-dioxo-1,4-dihydronaphthalen-2-yl)benzaldehyde (**10f**)

4-(3-hydroxy-1,4-dioxo-1,4-dihydronaphthalen-2-yl)benzaldehyde (**10g**)

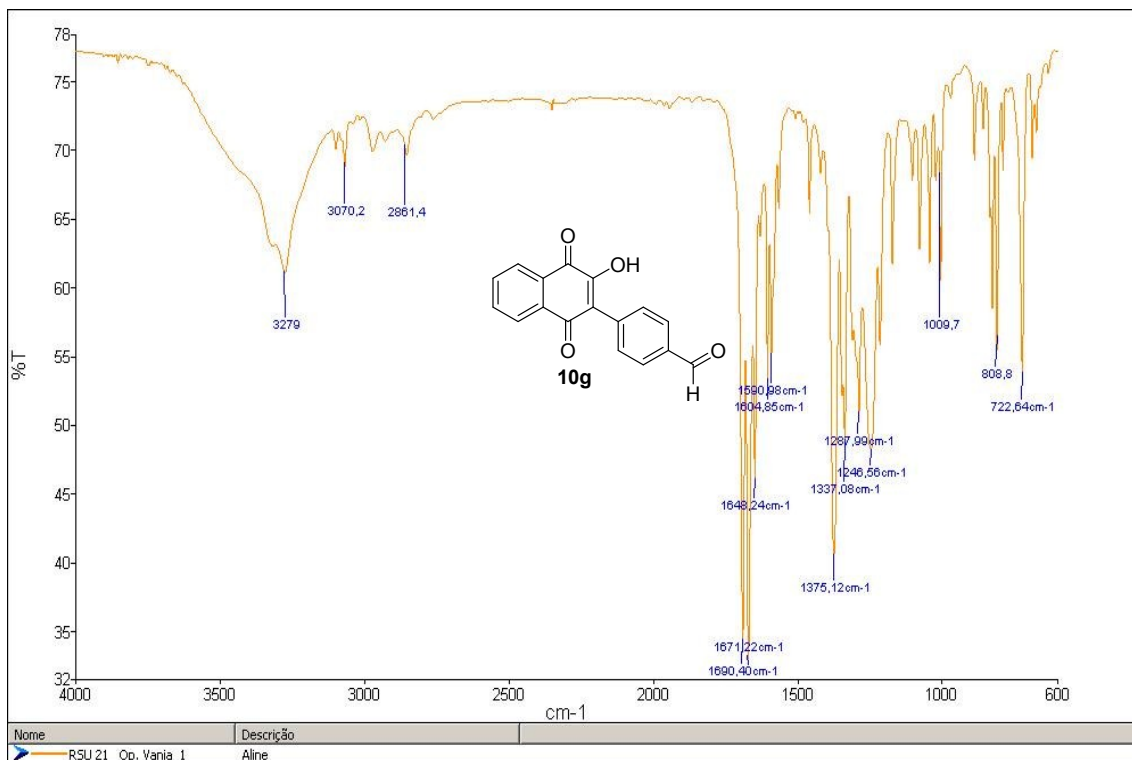

Figure S29 - Infrared spectrum of 4-(3-hydroxy-1,4-dioxo-1,4-dihydronaphthalen-2-yl)benzaldehyde (**10g**)

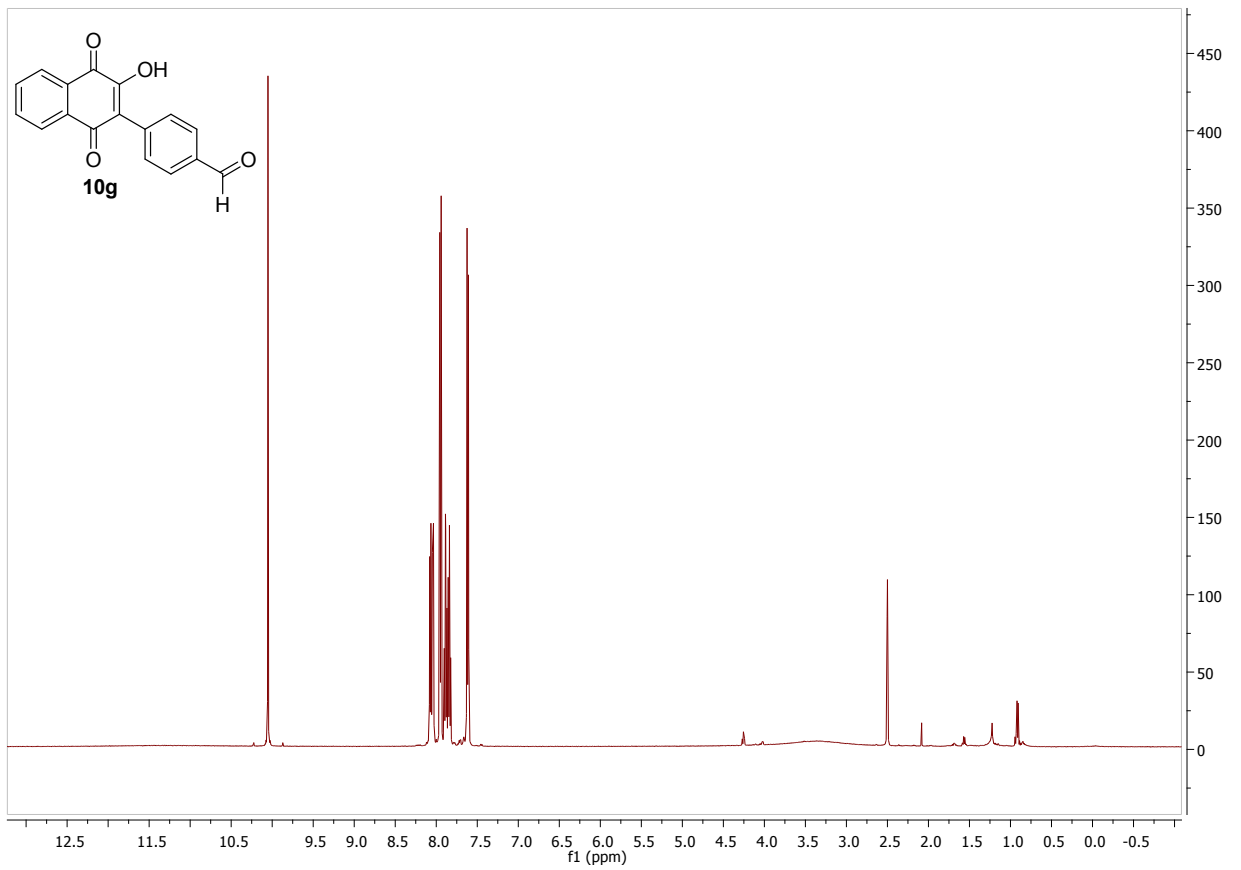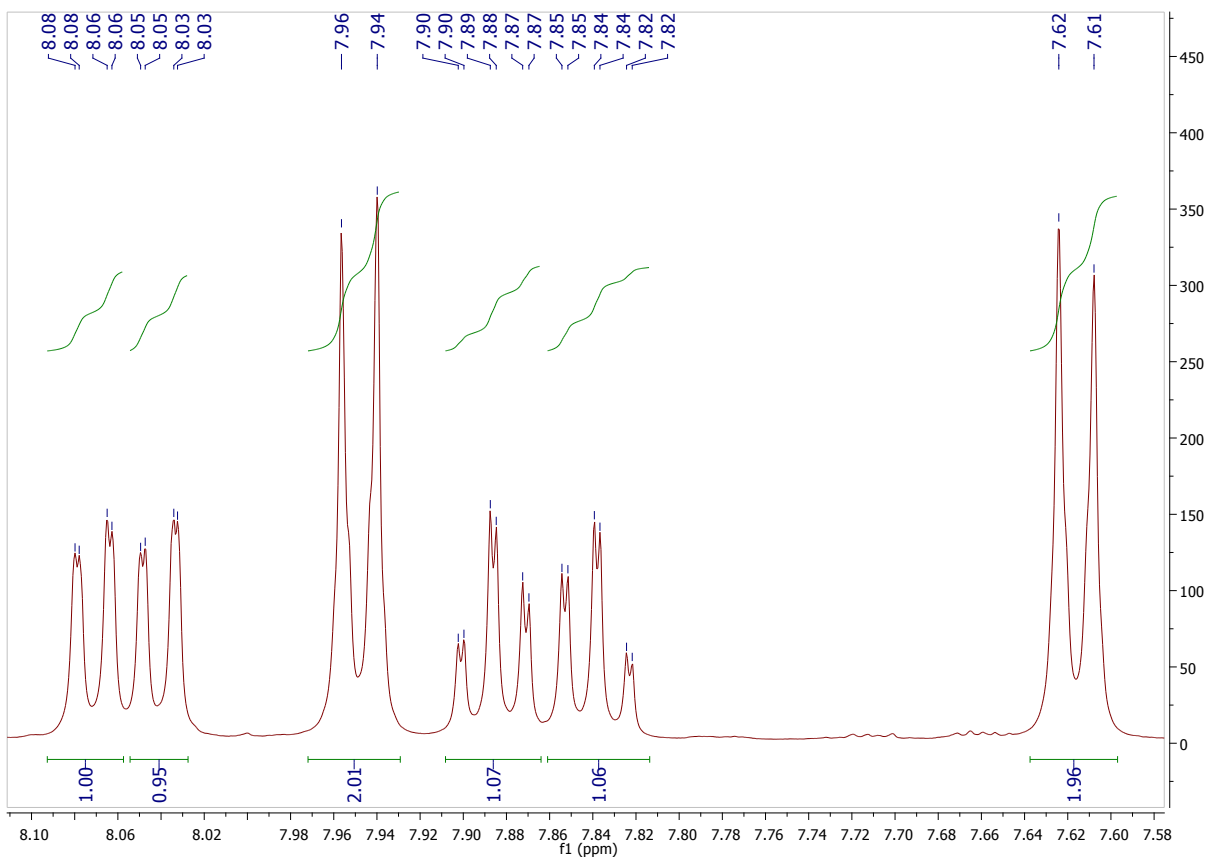

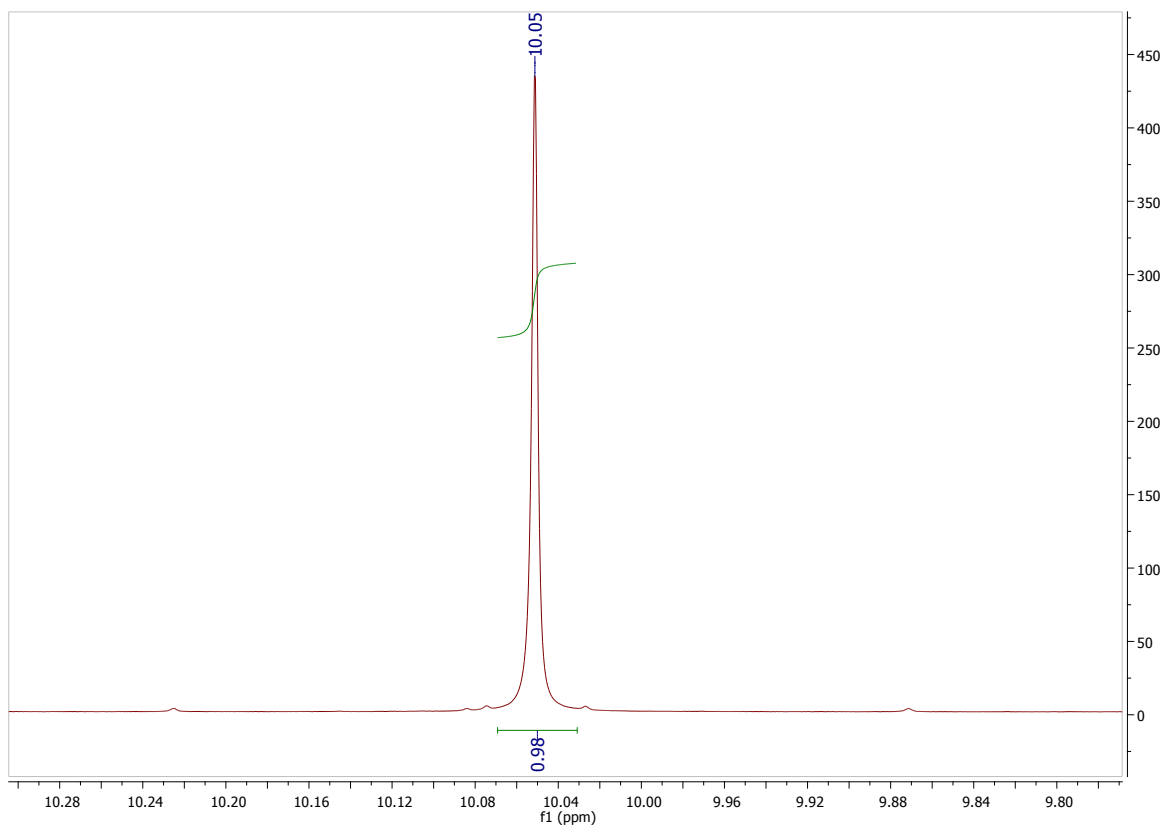

Figure S30 -  $^1\text{H}$  NMR Spectra of 4-(3-hydroxy-1,4-dioxo-1,4-dihydronaphthalen-2-yl)benzaldehyde (**10g**)

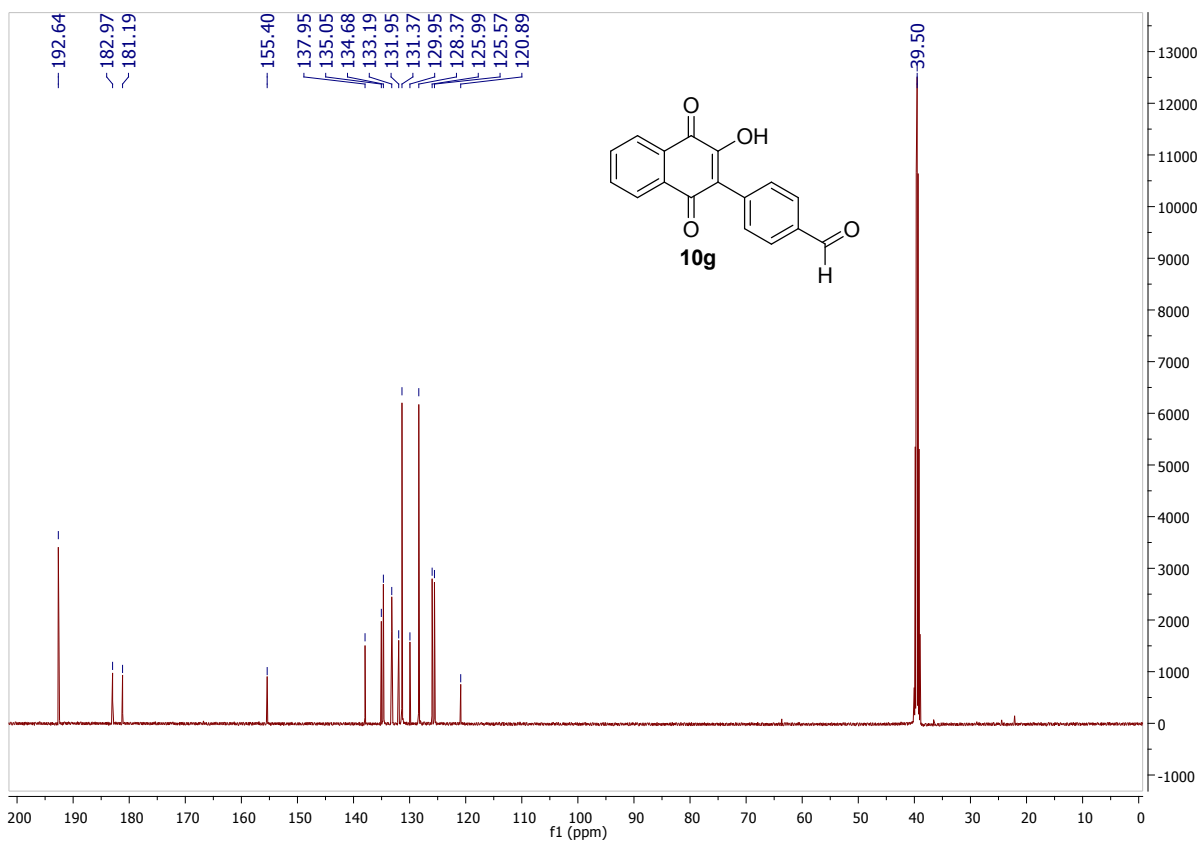

Figure S31 -  $^{13}\text{C}$  NMR Spectra of 4-(3-hydroxy-1,4-dioxo-1,4-dihydronaphthalen-2-yl)benzaldehyde (**10g**)



### 2-Hydroxy-3-(4-methoxyphenyl)naphthalene-1,4-dione (10h)

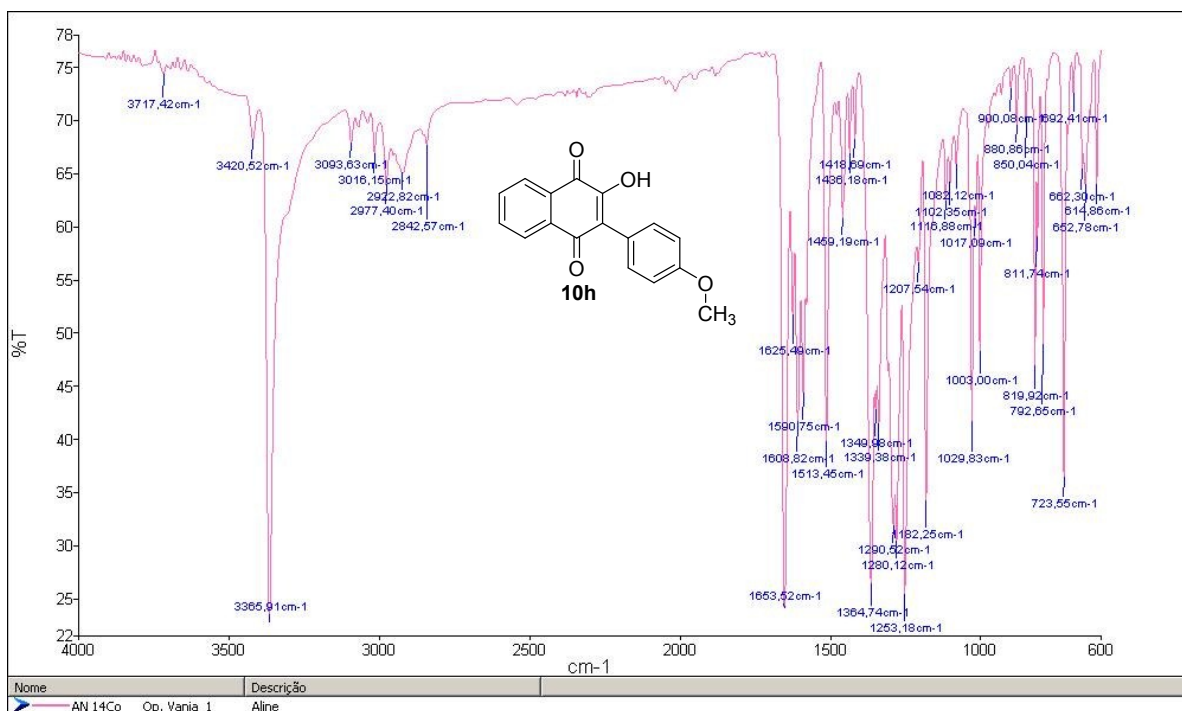

Figure S32 Infrared spectrum of 2-hydroxy-3-(4-methoxyphenyl)naphthalene-1,4-dione (10h)

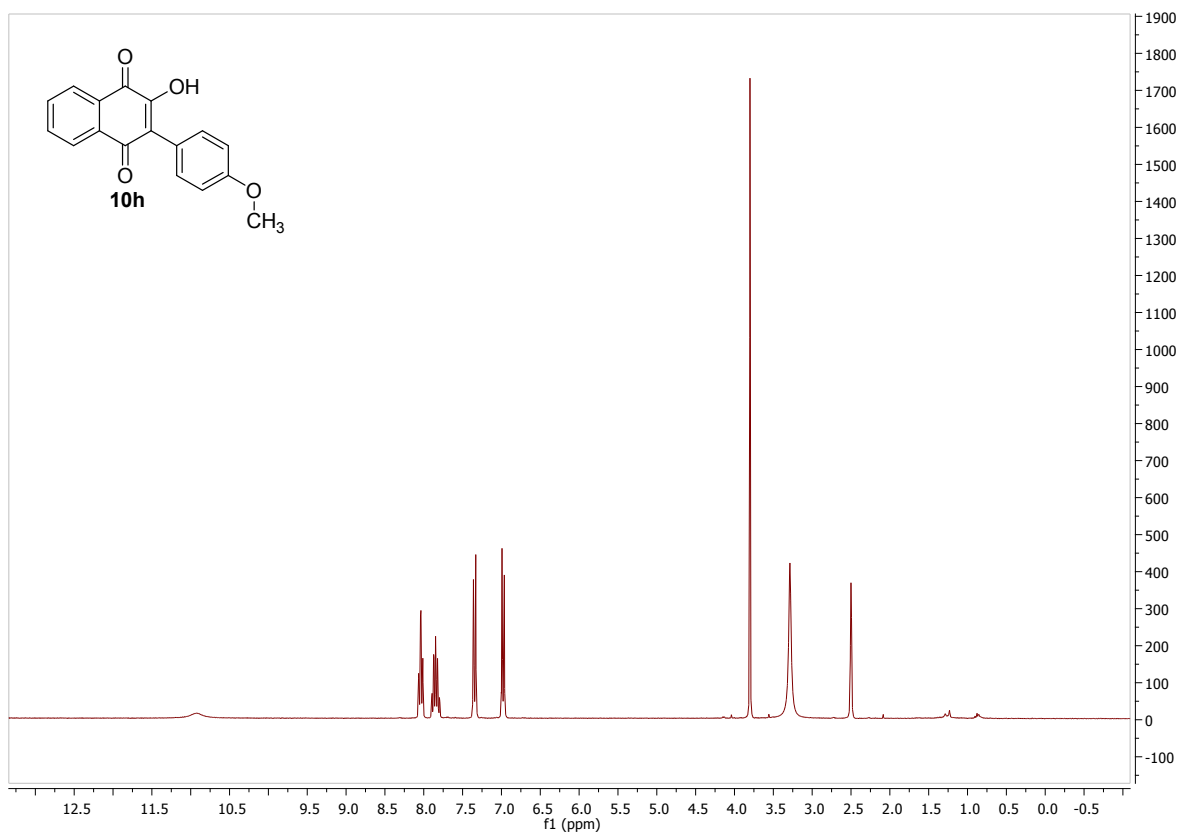

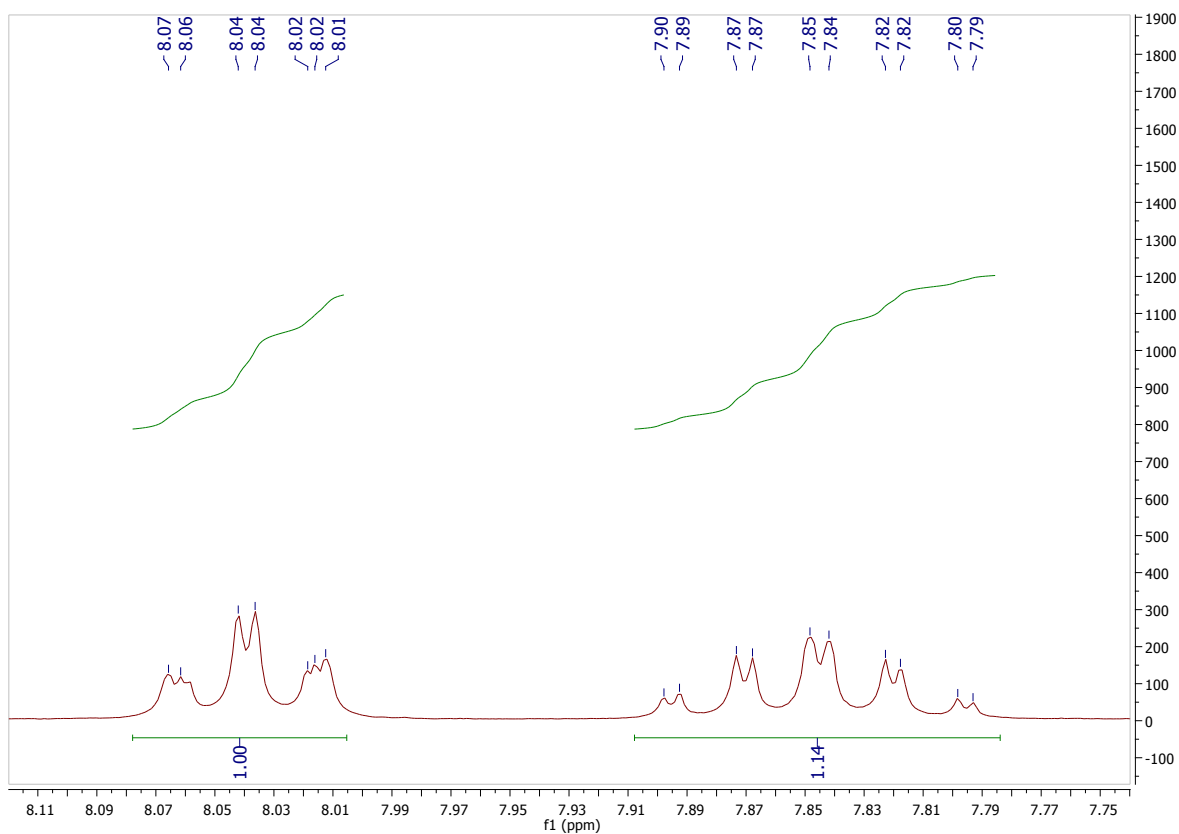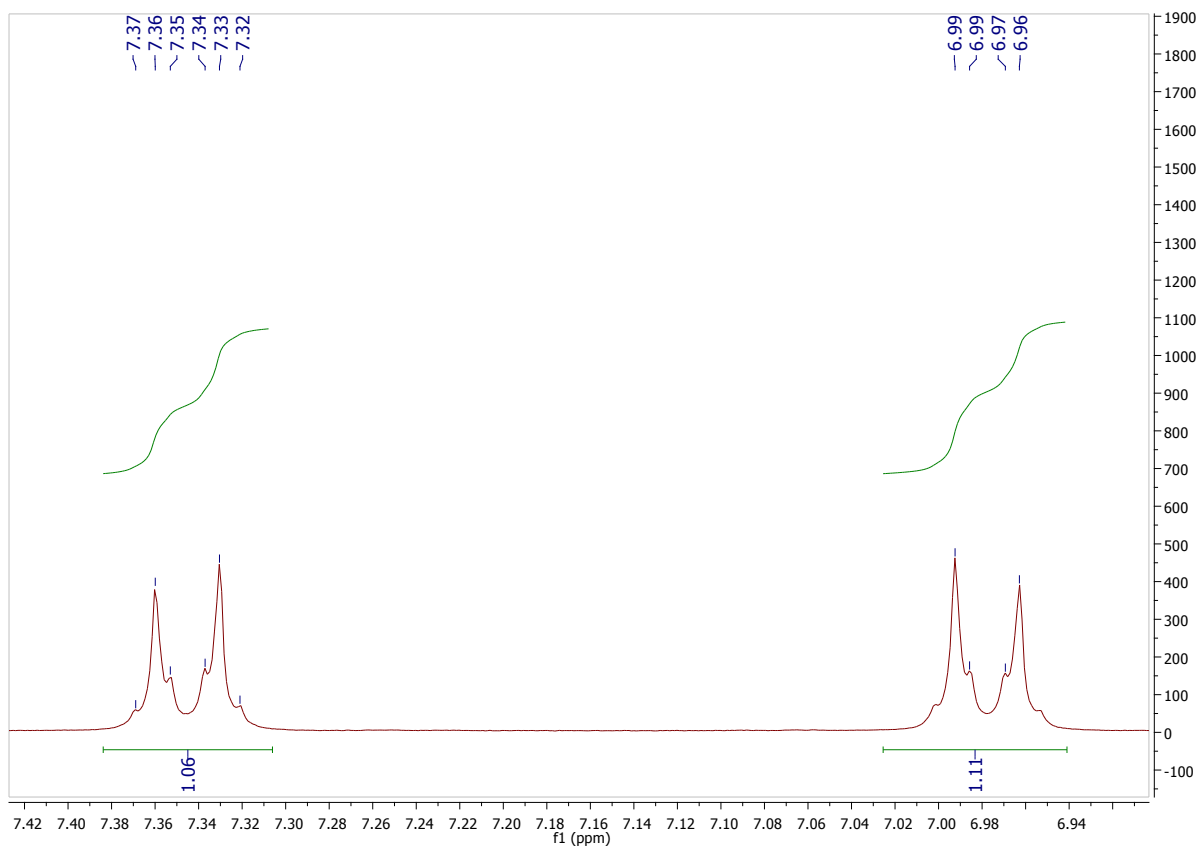

Figure S33 -  $^1\text{H}$  NMR Spectra of 2-hydroxy-3-(4-methoxyphenyl)naphthalene-1,4-dione (**10h**)

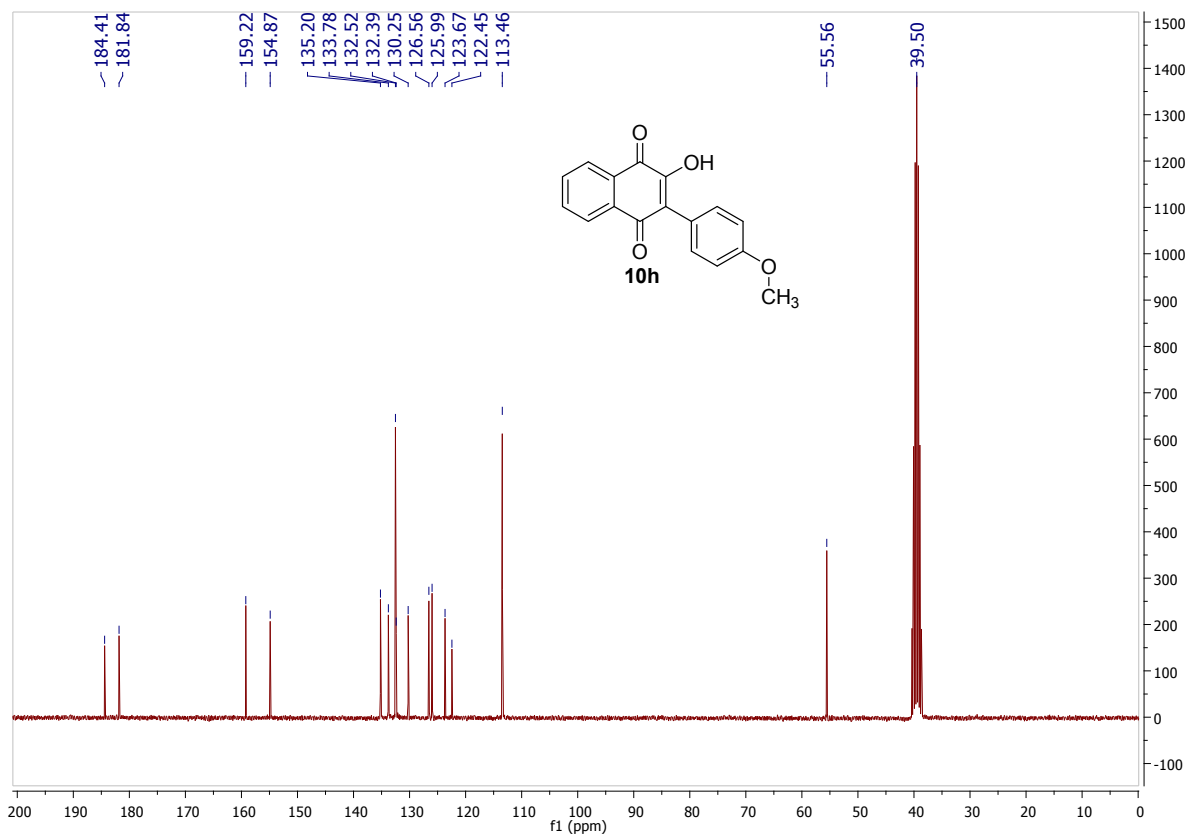

Figure S34 -  $^1\text{H}$  NMR Spectra of 2-hydroxy-3-(4-methoxyphenyl)naphthalene-1,4-dione (10h)

2-Hydroxy-3-(3-methoxyphenyl)naphthalene-1,4-dione (10i)

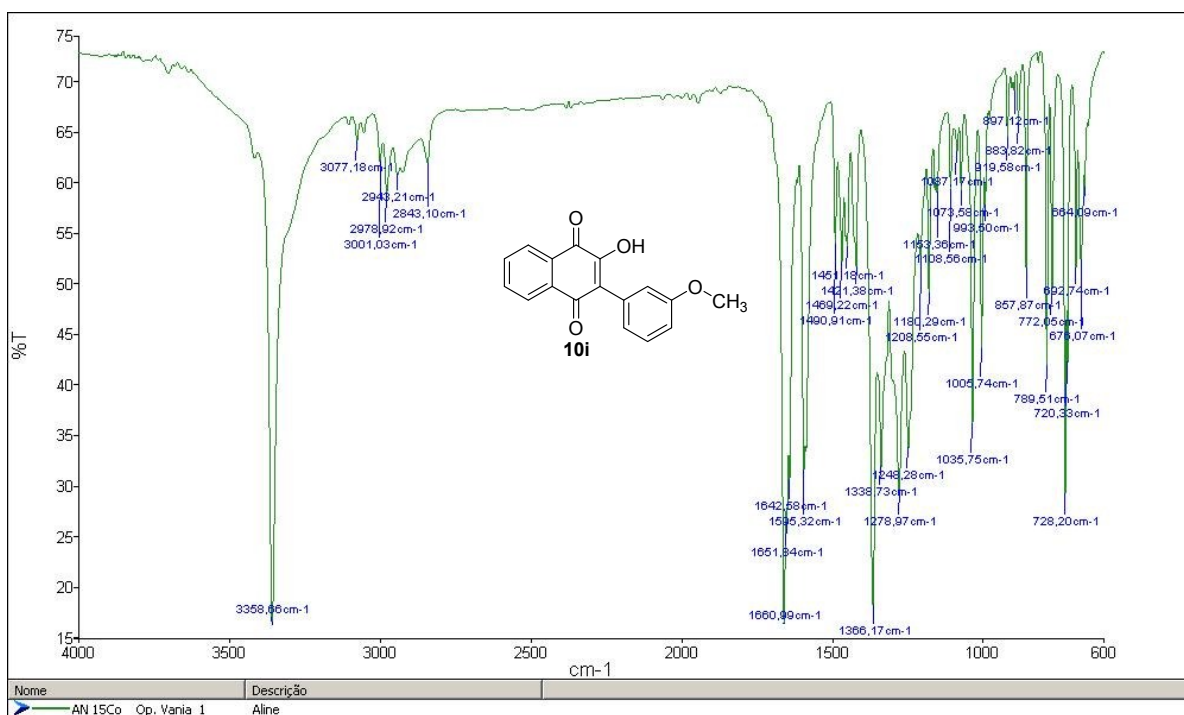

Figure S35 - Infrared spectrum of 2-hydroxy-3-(3-methoxyphenyl)naphthalene-1,4-dione (10i)

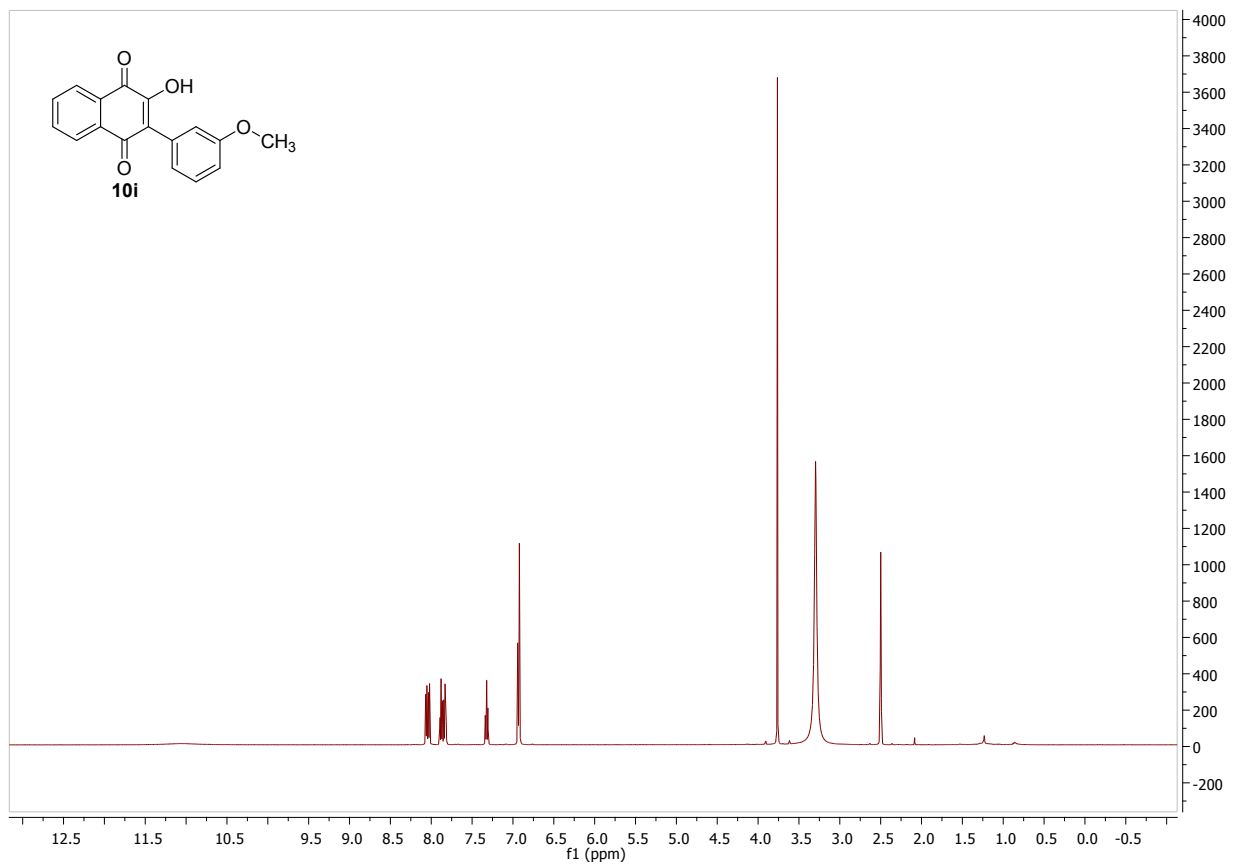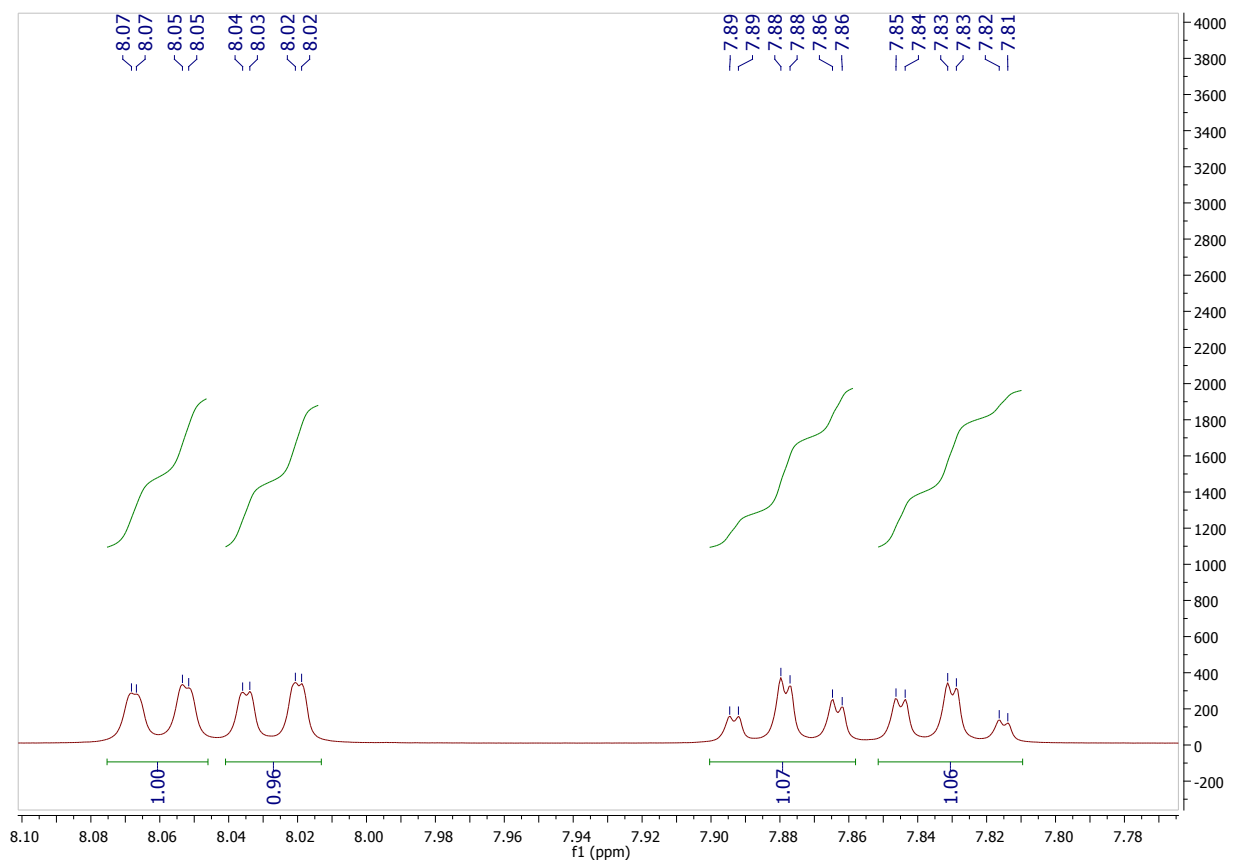

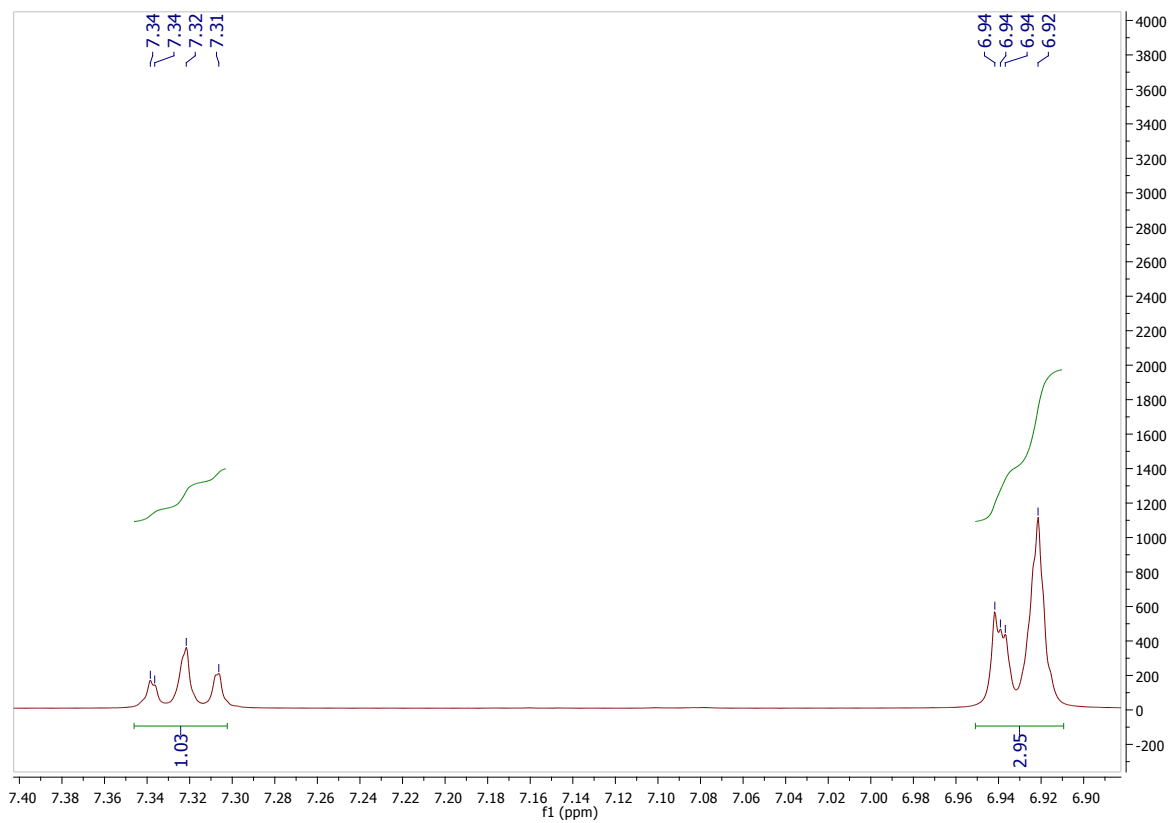

Figure S36 -  $^1\text{H}$  NMR Spectra of 2-hydroxy-3-(3-methoxyphenyl)naphthalene-1,4-dione (**10i**)

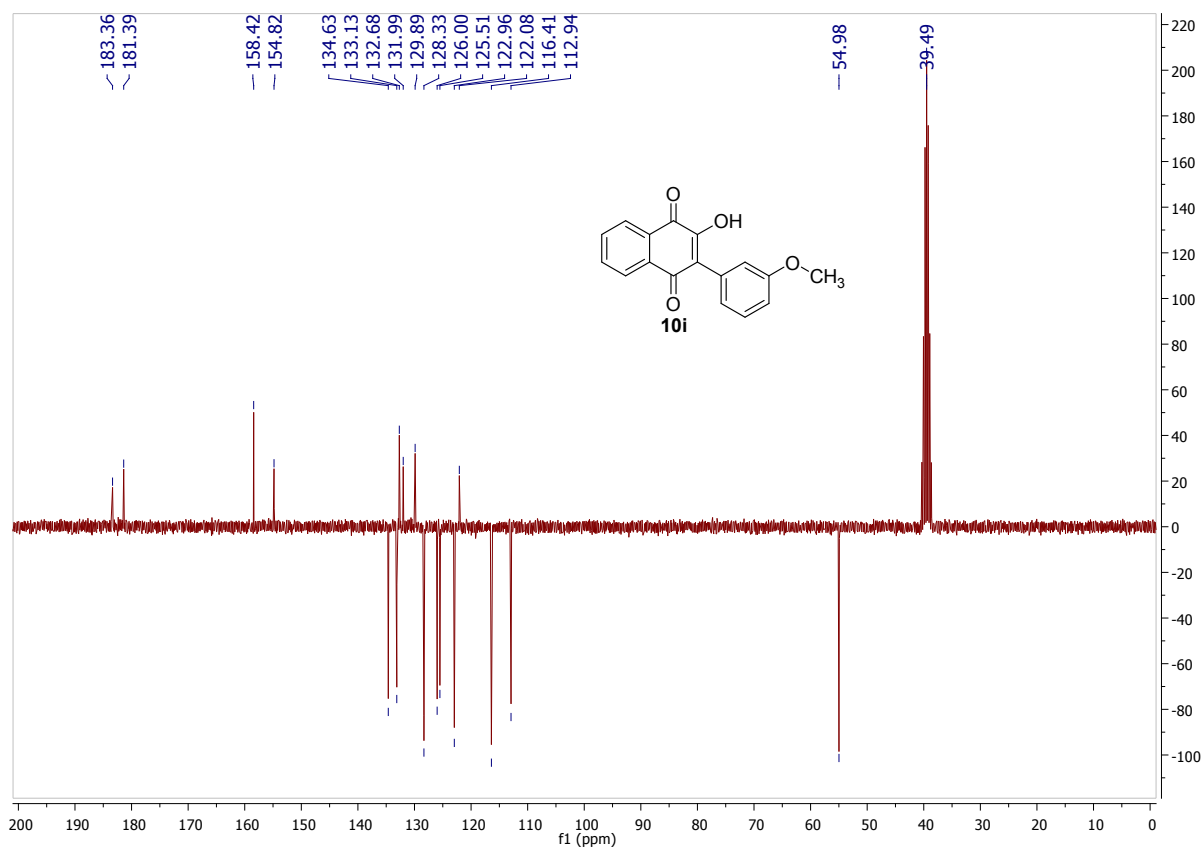

Figure S37 -  $^{13}\text{C}$  NMR Spectra of 2-hydroxy-3-(3-methoxyphenyl)naphthalene-1,4-dione (**10i**)

### 4-(3-Hydroxy-1,4-dioxo-1,4-dihydronaphthalen-2-yl)benzotrile (10j)

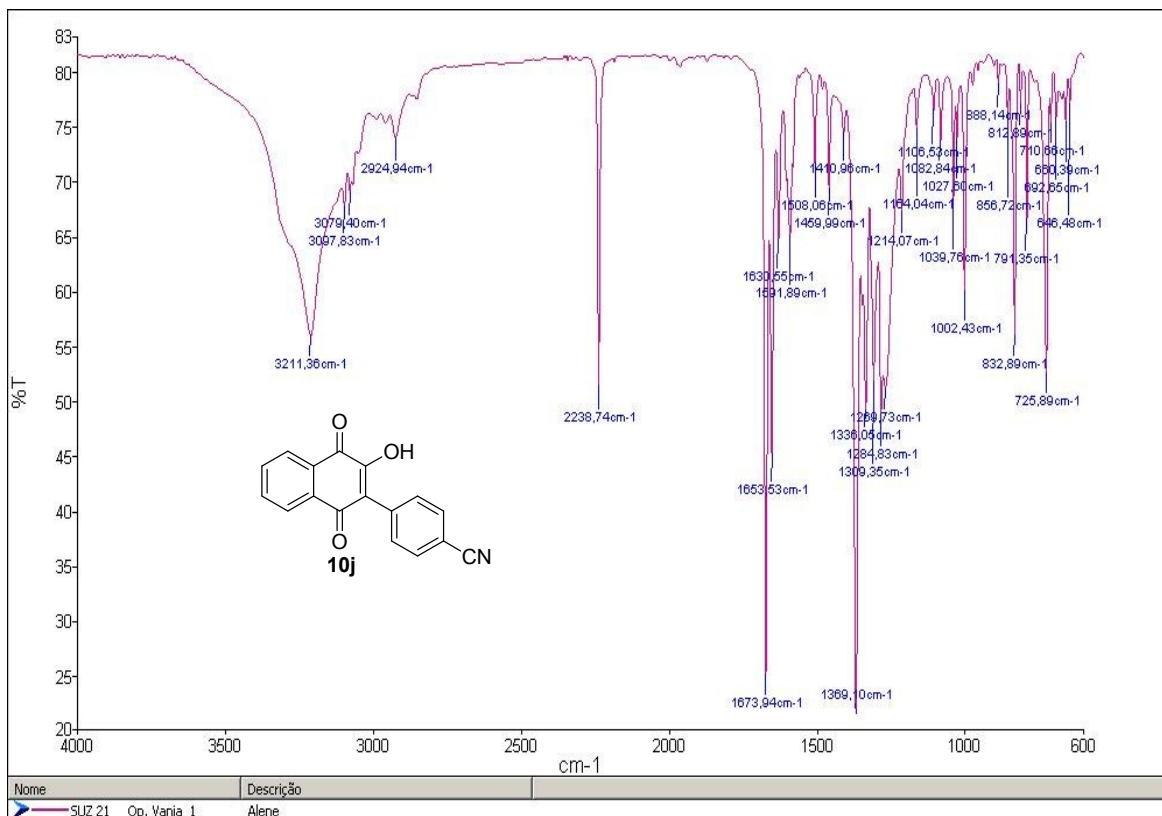

Figure S38 - Infrared spectrum of 4-(3-Hydroxy-1,4-dioxo-1,4-dihydronaphthalen-2-yl)benzotrile (10j)

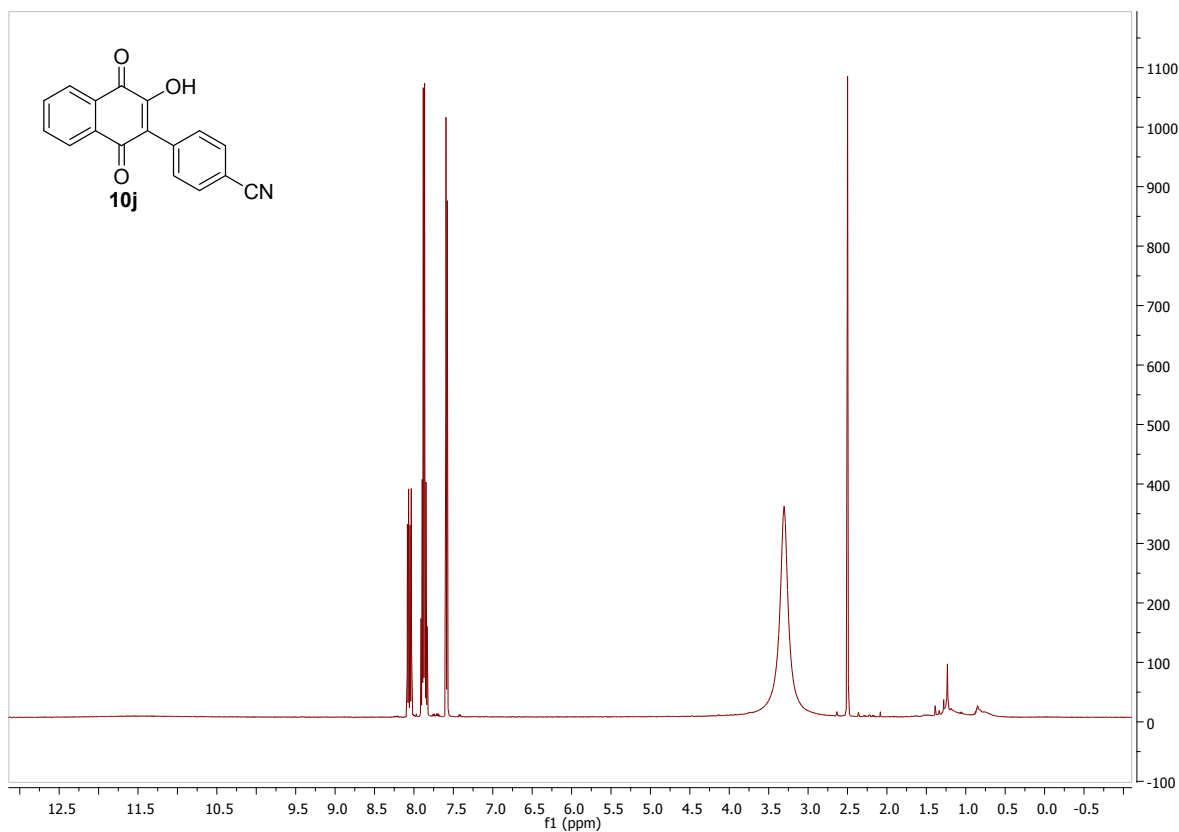

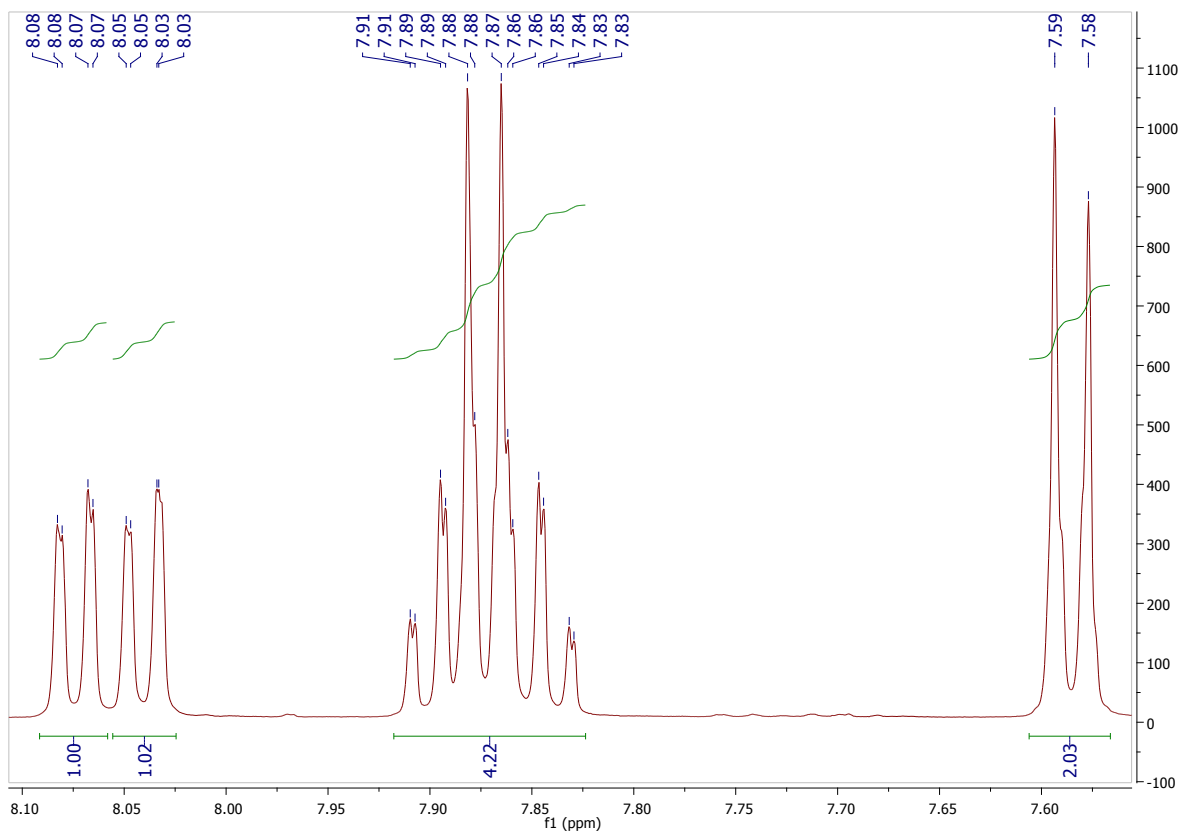

Figure S39 -  $^1\text{H}$  NMR Spectra of 4-(3-Hydroxy-1,4-dioxo-1,4-dihydronaphthalen-2-yl)benzotrile (**10j**)

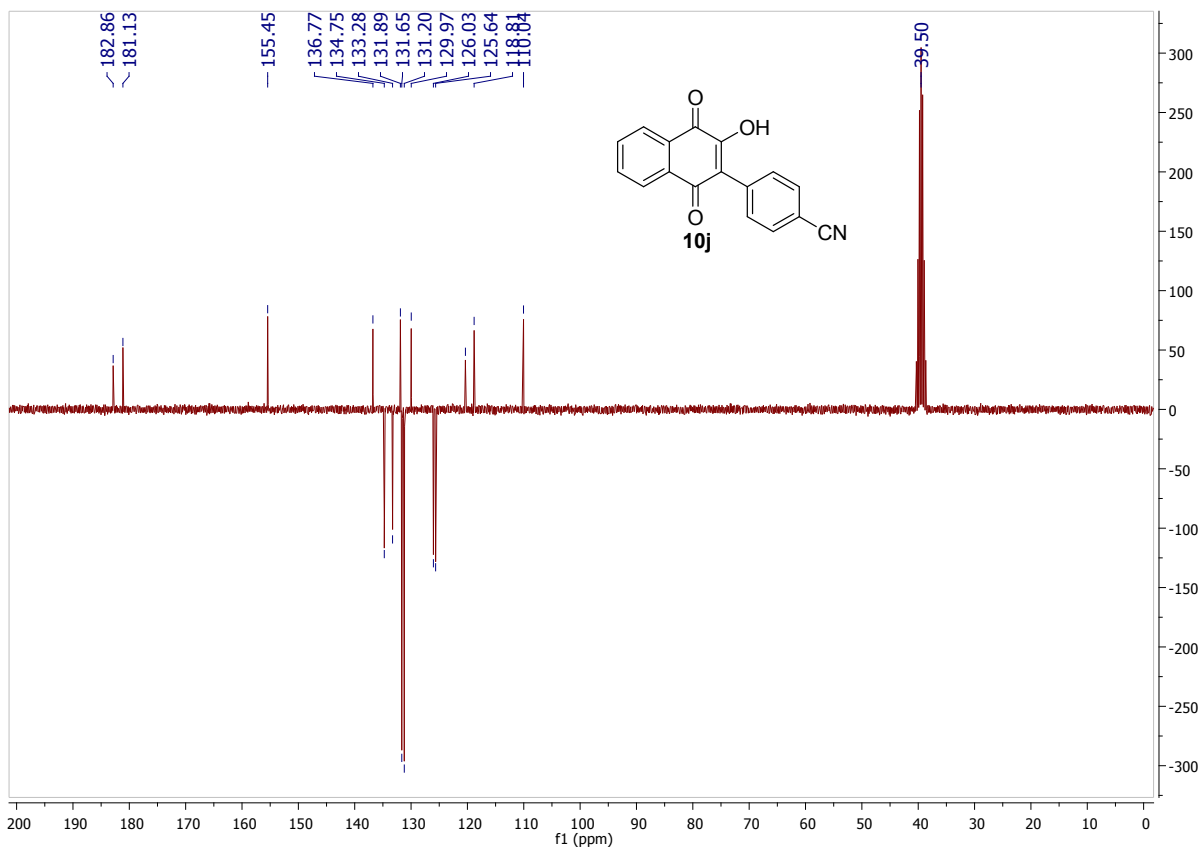

Figure S40 -  $^{13}\text{C}$  NMR Spectra of 4-(1,4-dihydro-2-hydroxy-1,4-dioxonphtalen-3-yl)benzotrile (**10j**)

2-Hydroxy-3-(*p*-tolyl)naphthalene-1,4-dione (10k)

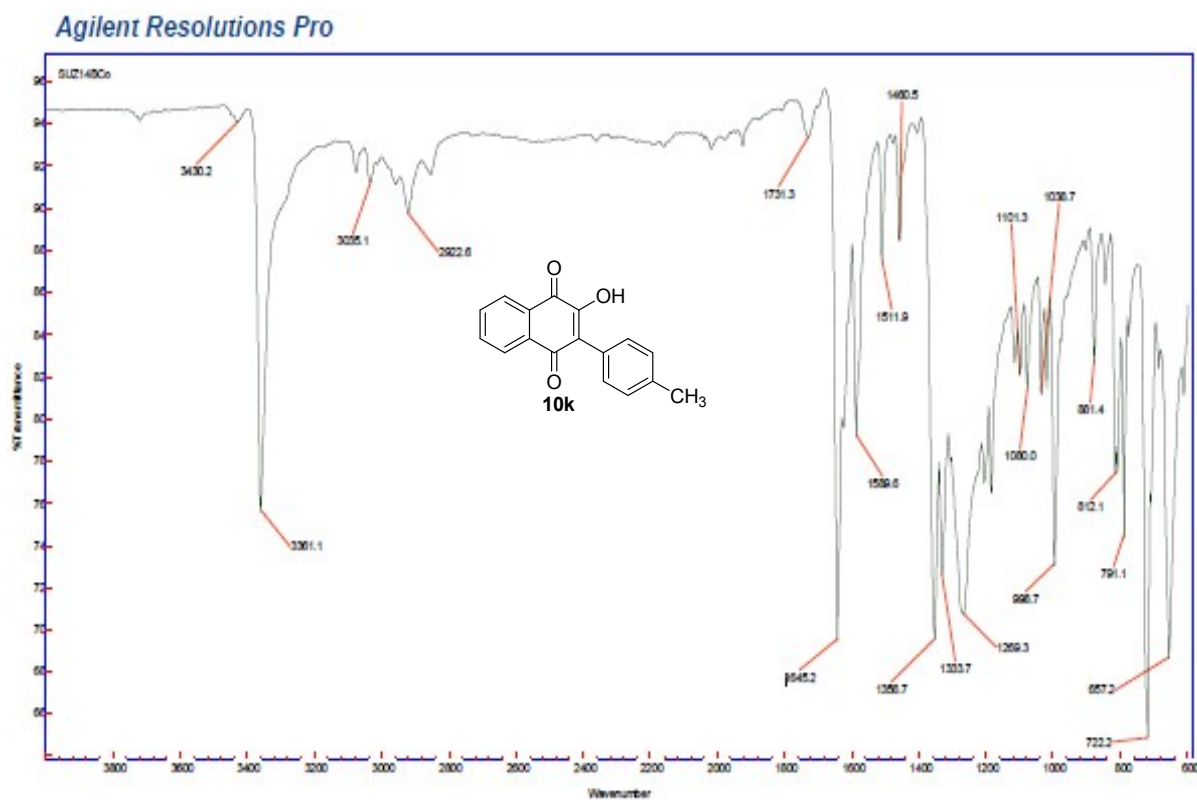

Figure S41 - Infrared spectrum of 2-Hydroxy-3-(*p*-tolyl)naphthalene-1,4-dione (10k)

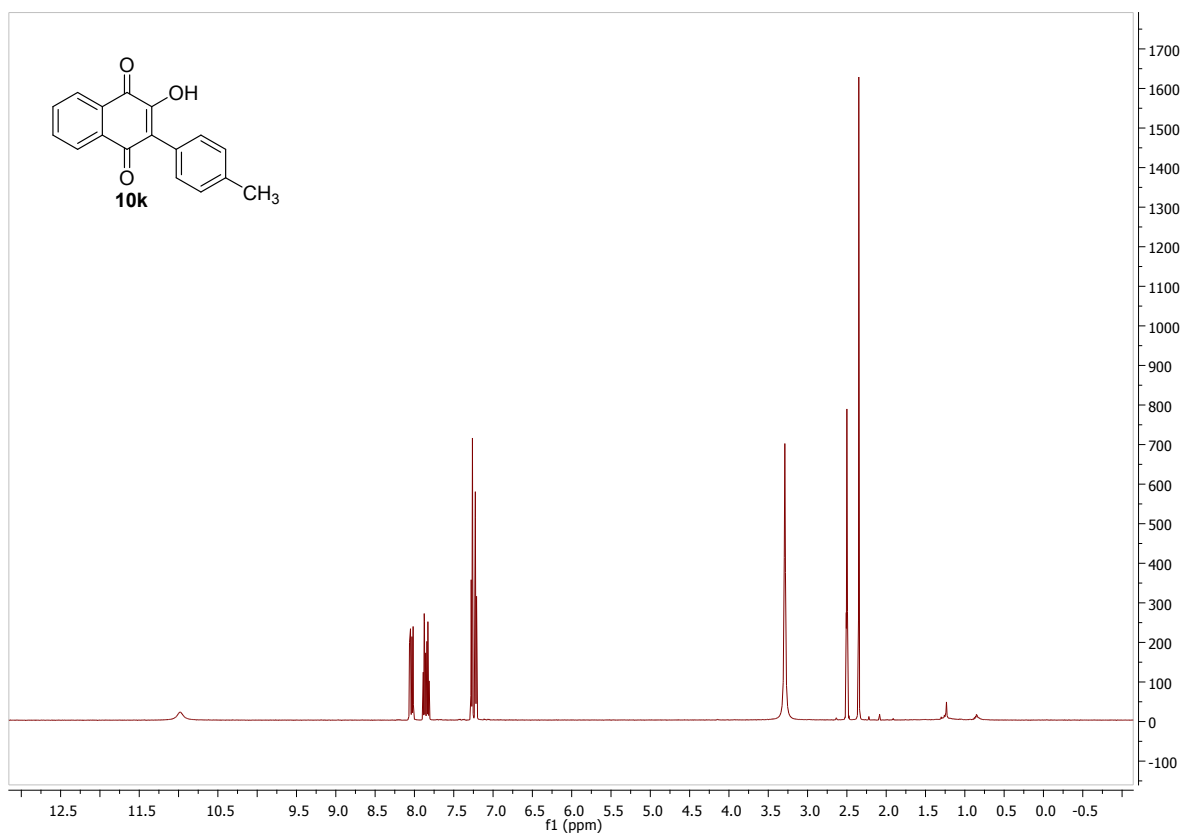



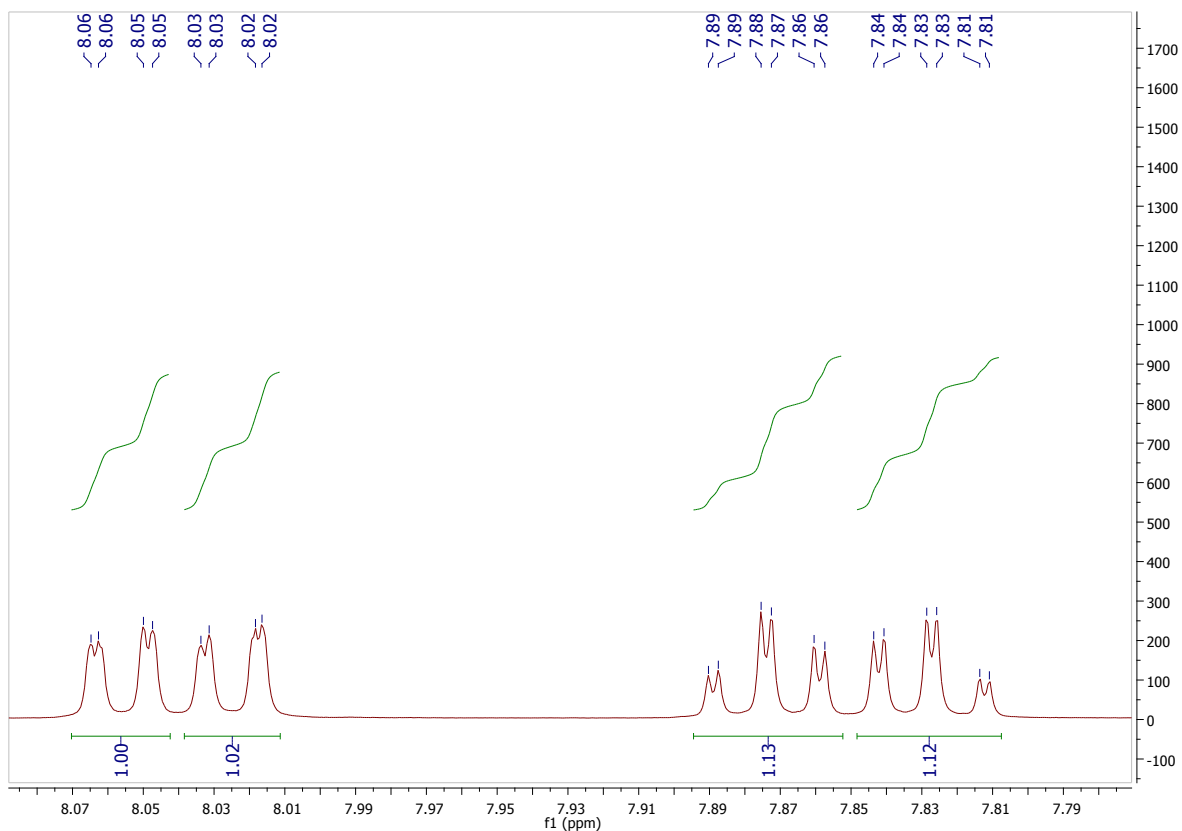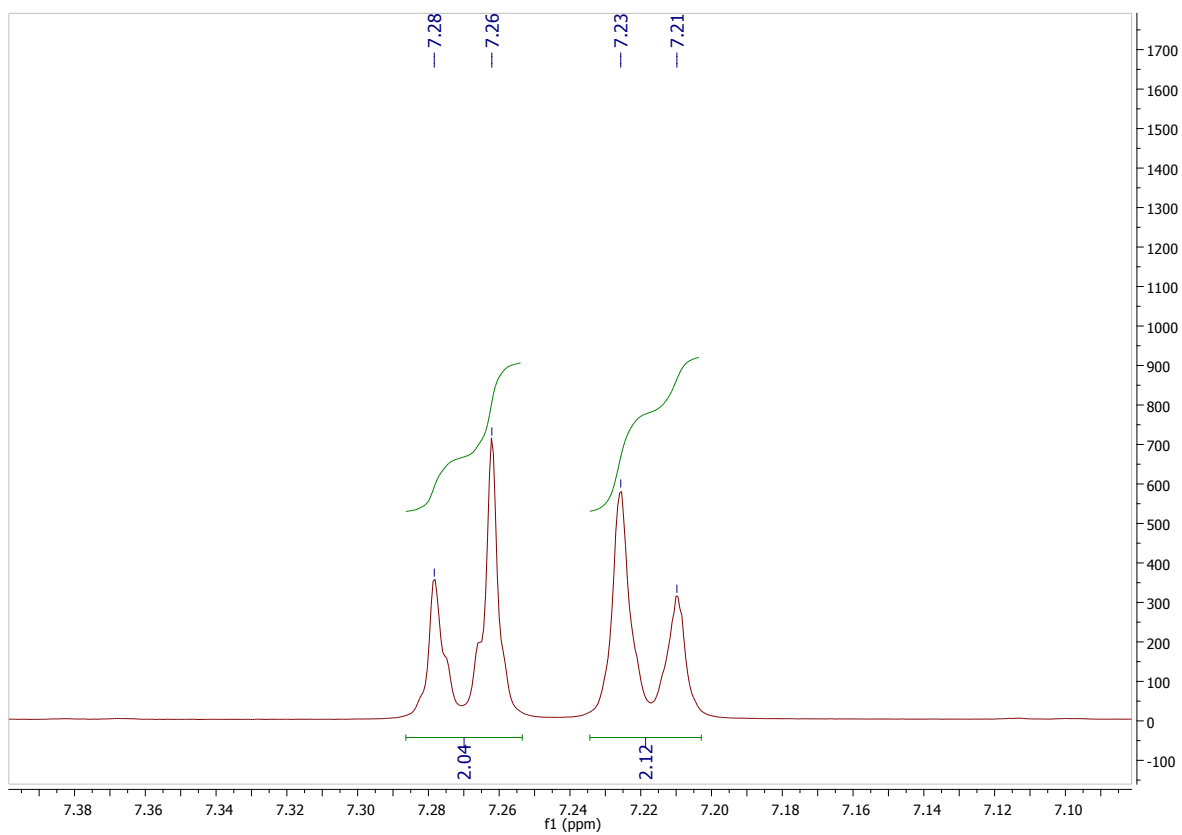

Figure S42 -  $^1\text{H}$  NMR Spectra of 2-Hydroxy-3-(*p*-tolyl)naphthalene-1,4-dione (**10k**)

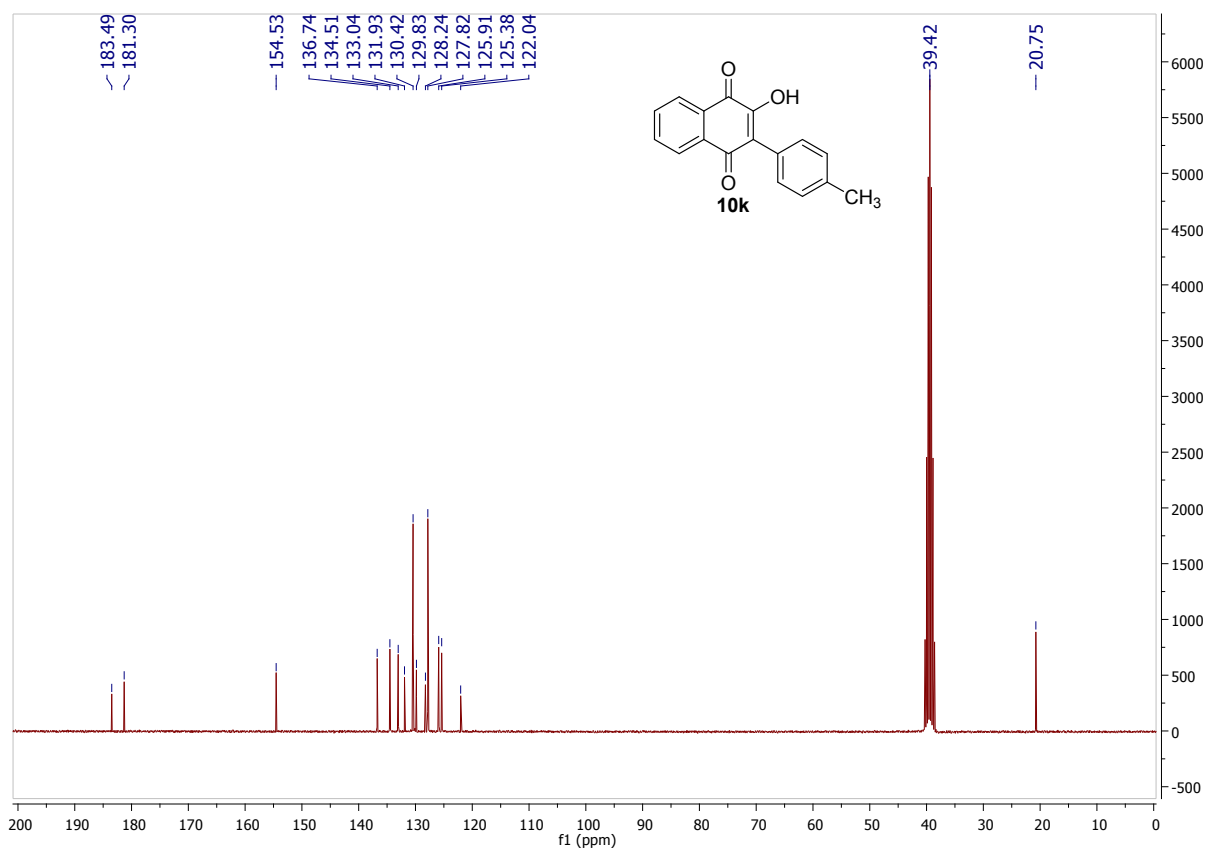

Figure S43 - <sup>13</sup>C NMR Spectra of 2-Hydroxy-3-(*p*-tolyl)naphthalene-1,4-dione (**10k**)

2-Amino-3-phenylnaphthalene-1,4-dione (**11**)

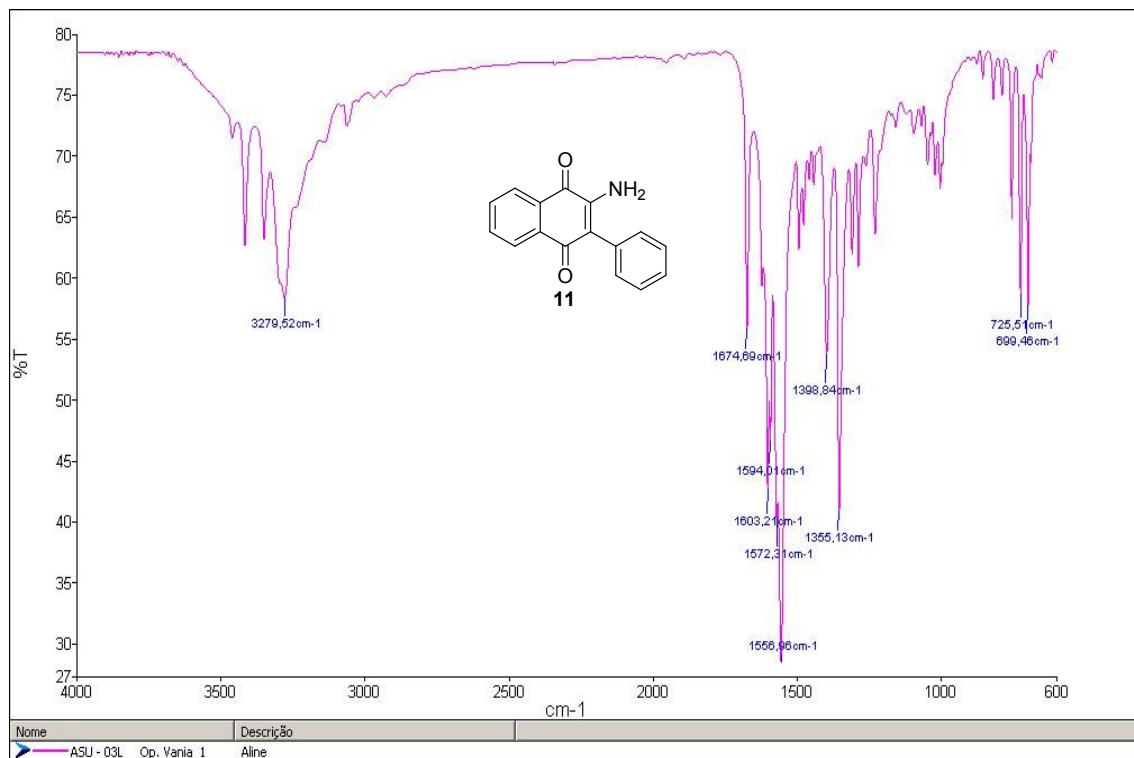

Figure S44 - Infrared spectrum of 2-amino-3-phenylnaphthalene-1,4-dione (**11**)

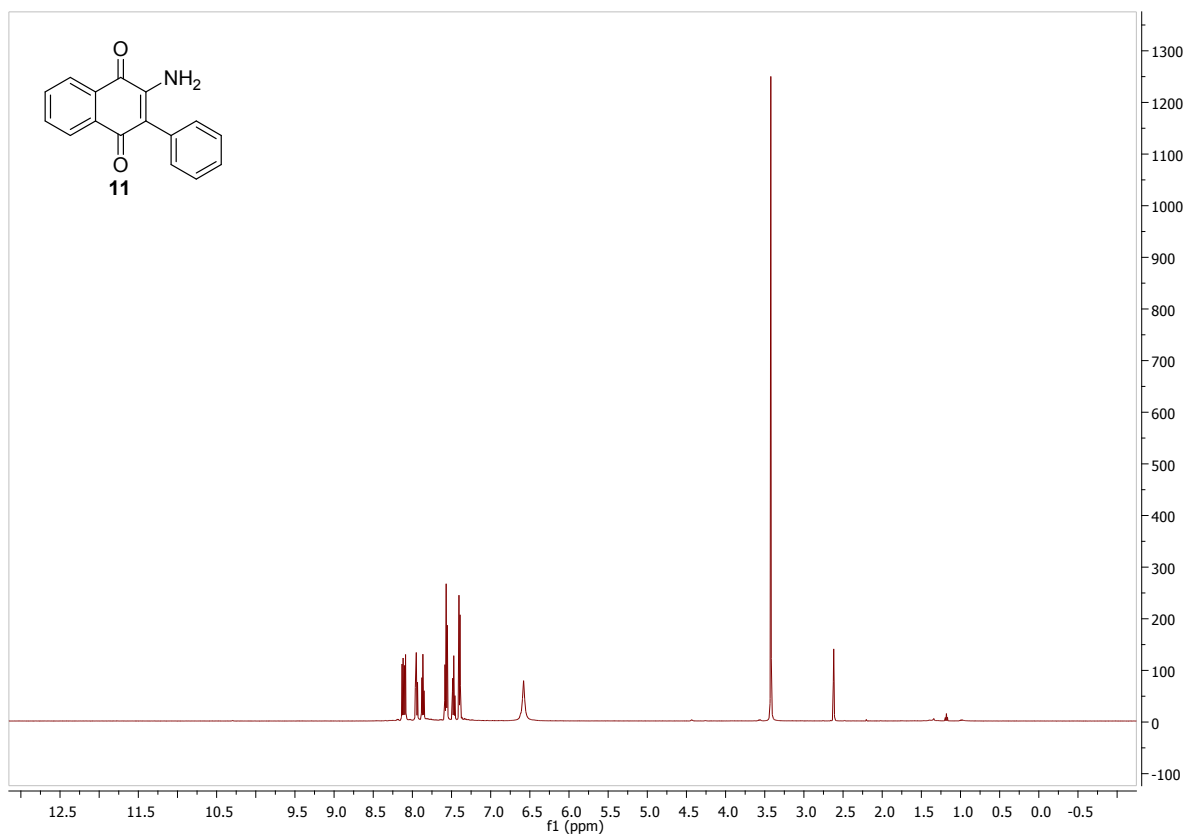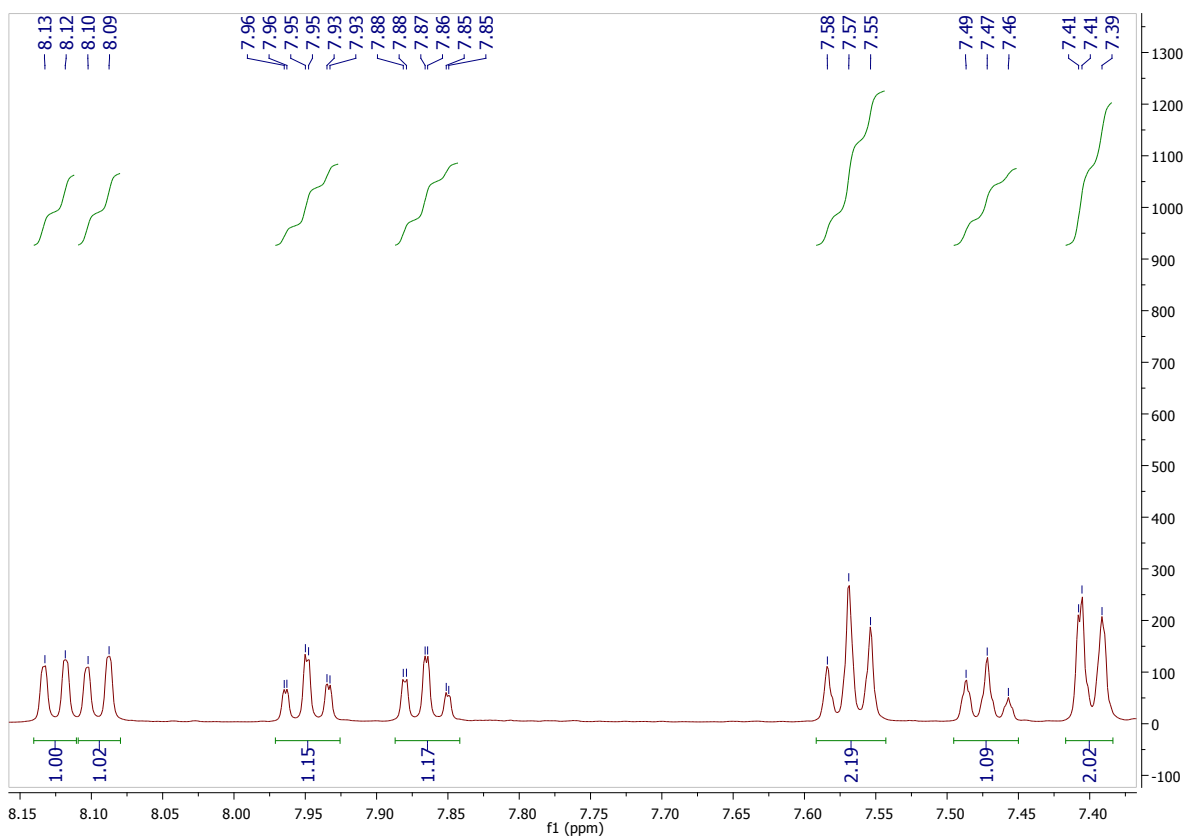

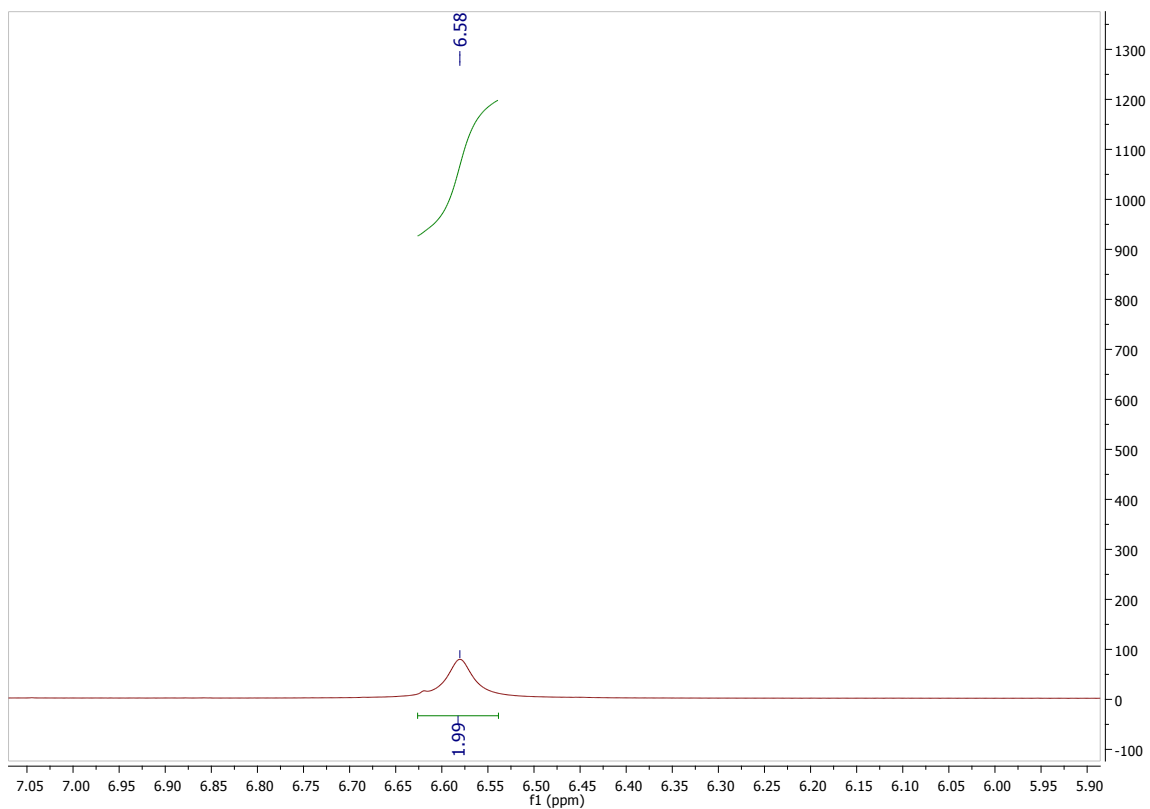

Figure S45 -  $^1\text{H}$  NMR Spectra of 2-amino-3-phenylnaphthalene-1,4-dione (**11**)

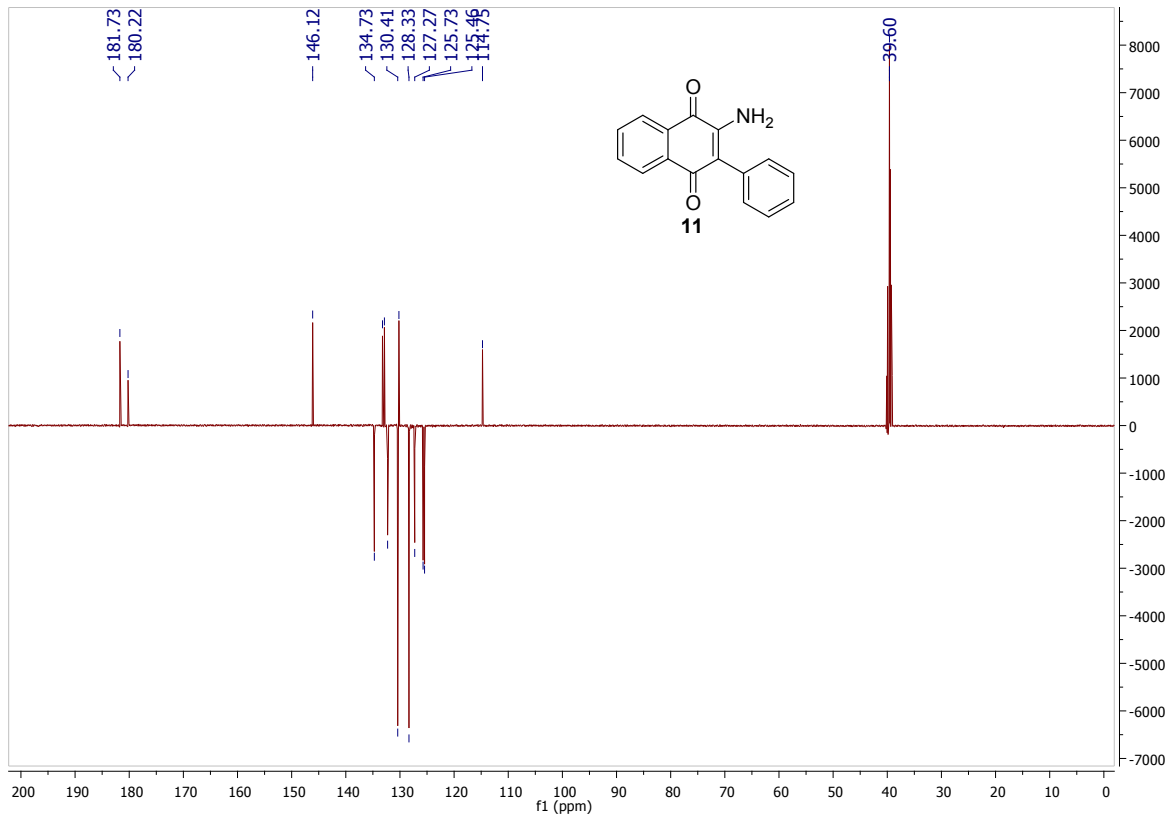

Figure S46 -  $^{13}\text{C}$  NMR Spectra of 2-amino-3-phenylnaphthalene-1,4-dione (**11**)
